# Supplementary material
Source: PubMed Central journal article supplement (PMC8415620)
Supplement: NIHMS1735096-supplement-Fortenberry_Supplement.pdf [file NIHMS1735096-supplement-Fortenberry_Supplement.pdf]

*DOI: 10.1111/ina.12584*

*Supplement of*

Analysis of Indoor Particles and Gases and their Evolution with Natural Ventilation during the Air Composition and Reactivity from Outdoor and Indoor Mixing (ACRONIM) Field Campaign

Claire F. Fortenberry et al.

*Correspondence to:* Brent J. Williams ([brentw@wustl.edu](mailto:brentw@wustl.edu))

## Section S1: Field Site Description and Information

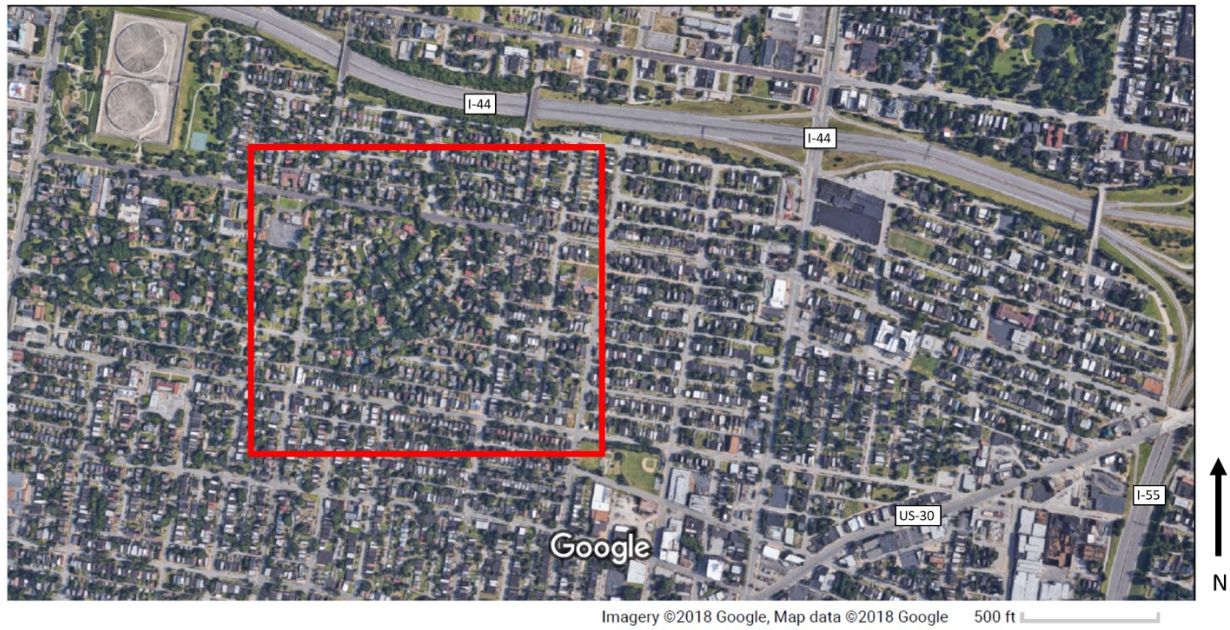

Figure S1. Map showing area in which test home is located (red box).<sup>1</sup> Major highways (I-44, I-55, US-30) are labeled for reference.

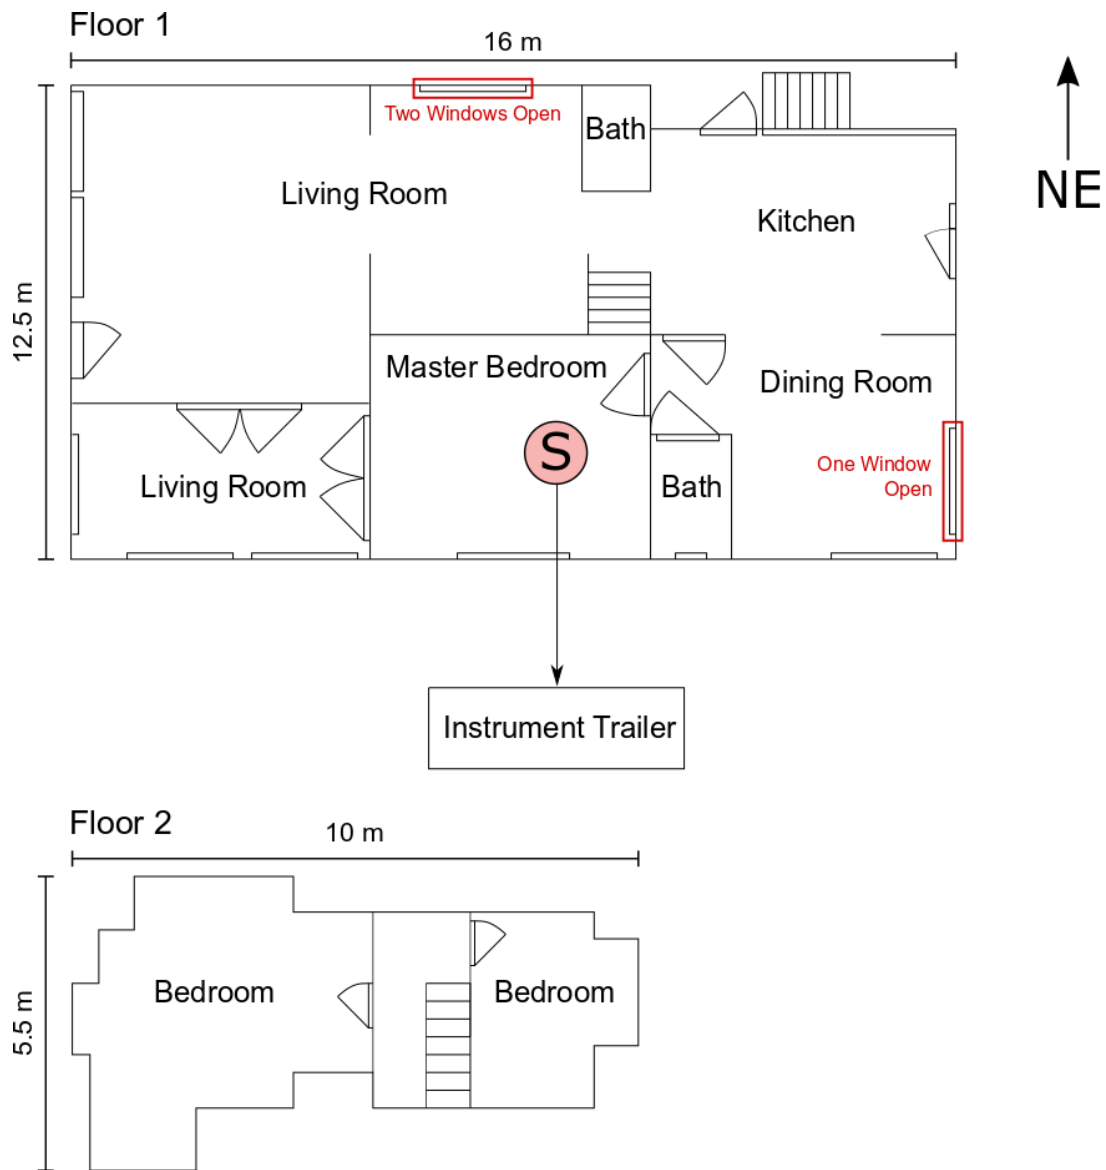

Figure S2. Approximate floor plan of the two floors composing the test home sample volume. The red circles denotes location of sample line inlets. Windows opened during window-opening periods are labeled with red boxes.



## Section S2: Supplemental Measurements

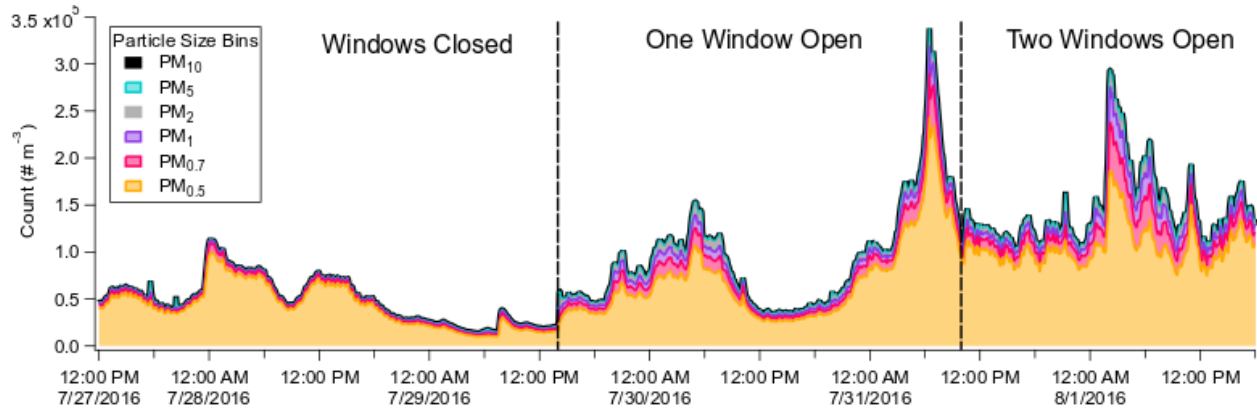

Figure S4. Particle number concentrations ( $\# m^{-3}$ ) for six different size bins measured indoors by the OPC.

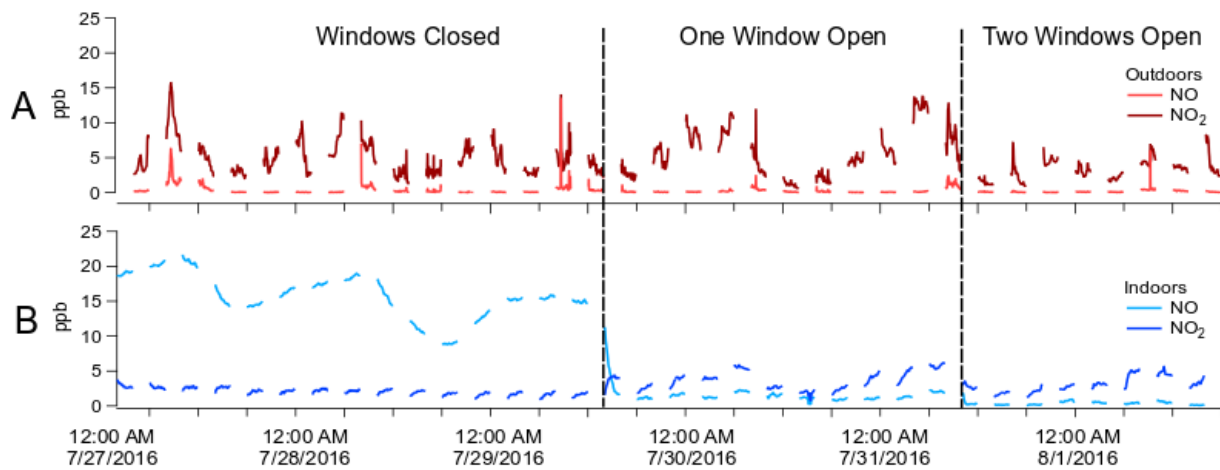

Figure S5. NO<sub>x</sub> (NO and NO<sub>2</sub>) concentrations measured (A) outdoors and (B) indoors. The trace-level NO<sub>x</sub> monitor was operated on the indoor/outdoor switching schedule (Table 1).

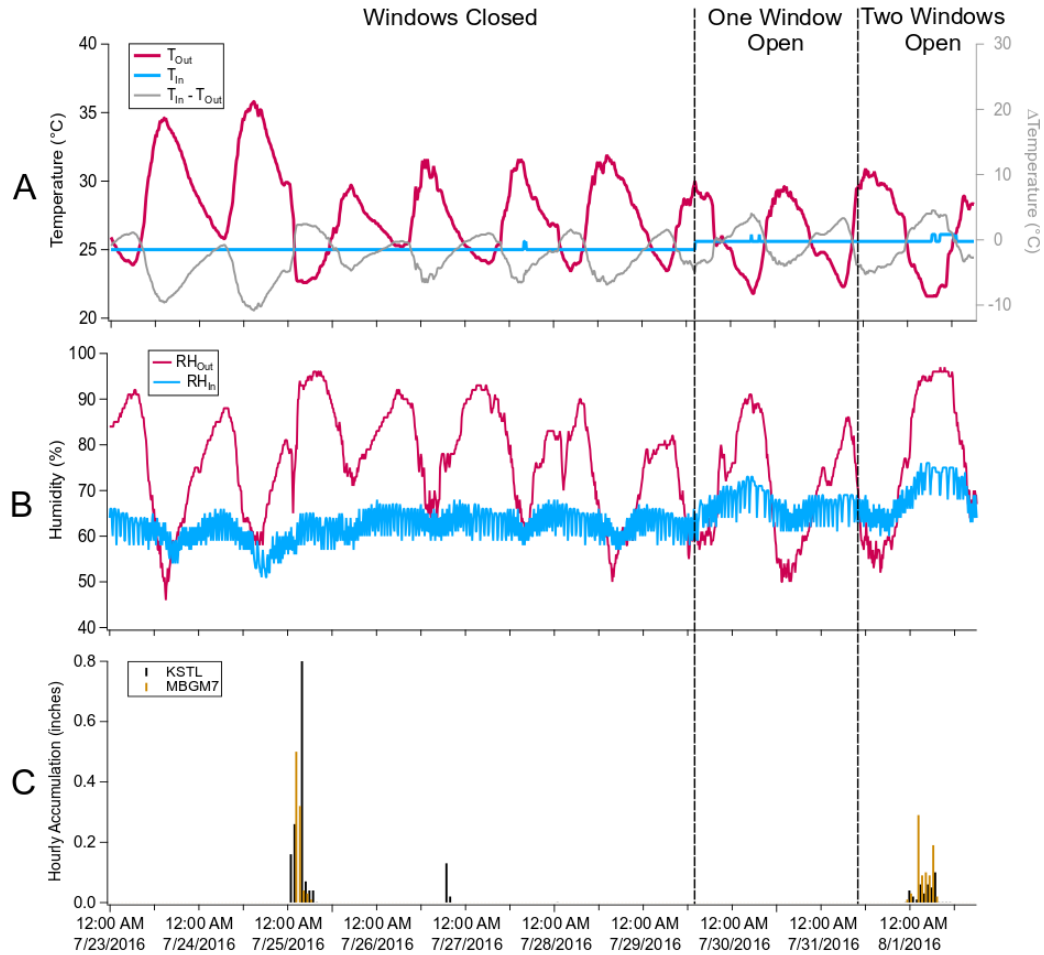

Figure S6. (A) Temperature data recorded outdoors and indoors for the unoccupied study period; (B) relative humidity (RH) recorded outdoors and indoors for the unoccupied study period; (C) rainfall, in units of inches accumulated per hour, recorded at two area weather stations: St. Louis Lambert International Airport (KSTL), located approximately 20 km northwest of the field site, and the Missouri Botanical Gardens/MBOT (MBGM7), located approximately 2.5 km west of the site. These publicly-available data are compiled in the MesoWest database and were accessed through the MesoWest website ([mesowest.utah.edu](http://mesowest.utah.edu)).<sup>2-4</sup>

### Section S3: Gas-Phase Sample Analysis and Mass Quantification Methods

#### *Gas Chromatography-Mass Spectrometry Analysis*

Following collection, VOC adsorbent tubes were analyzed using thermal desorption gas chromatography-mass spectrometry (GC-MS). A Markes Unity 1 was used for desorption, focusing and injection. Tubes were desorbed for 12 minutes at 260°C with 20 mL min<sup>-1</sup> desorption flow (splitless). The trap was held at 10°C during desorption, then heated to 280°C for 3 minutes for injection onto the GC with an initial column flow of 1.3 ml/min and split flow of 20 mL min<sup>-1</sup>. The flow path temperature was 150°C. An Agilent 6890N Gas Chromatograph with an Agilent 5973 Mass Selective Detector were used for separation, detection and quantification. An HP-5MS column (0.25mm × 30m × 0.25µm; Agilent Technologies) was operated in constant pressure mode with an initial flow rate of 1.3 mL min<sup>-1</sup>. The initial temperature, 40°C, was held for 8 minutes followed by a 4°C min<sup>-1</sup> ramp to 100°C, a 15°C min<sup>-1</sup> ramp to 280°C and then held at that temperature for 5 minutes. The mass spectrometer was operated in scan mode from 50 to 550 *m/z*.

For each quantified compound, a 5-point calibration was performed by adding between 0 and 100 ng of analytes diluted in methanol to the sorbent. After adding solution, pure nitrogen flowing at 20 mL min<sup>-1</sup> for 10 minutes was used to evaporate the methanol prior to analysis. The limit of quantification was defined as 3 times the standard deviation of three replicates of an injection of the lowest calibration mass.

#### *High-Performance Liquid Chromatography Analysis*

Dinitrophenylhydrazine (DNPH) samples of C1-C5 aldehydes, plus acetone, were prepared based on EPA method TO-11A (U.S.E.P.A., 1999). The samples were analyzed using an auto-sampler high performance liquid chromatograph (HPLC), equipped with a Phenomenex Gemini 5u C18 110A column. Solvent flow rate was 1 mL min<sup>-1</sup> with a starting solution concentration ratio of 40% deionized water and 60% acetonitrile. This solution ratio was changed via a gradient method to 30%/70% over 20 minutes and to 0%/100% after 21 minutes, where it was maintained for five minutes before being returned to the original 40%/60% ratio after 32 minutes. The output wavelength detected was 360 µm. Mass calibration was performed by analyzing sequential acetonitrile dilutions of carbonyl-hydrazone (Supelco) standards.

### Section S4: TAG Multicomponent Standard

Table S1. Compounds included in the multicomponent TAG standard. All compounds were purchased from Sigma Aldrich (St. Louis, MO).

| Compound                                                                                                                                                                                                                                                                                                                      | Concentration (ng $\mu\text{L}^{-1}$ ) |
|-------------------------------------------------------------------------------------------------------------------------------------------------------------------------------------------------------------------------------------------------------------------------------------------------------------------------------|----------------------------------------|
| n-Tetracosane                                                                                                                                                                                                                                                                                                                 | 2                                      |
| n-Octacosane                                                                                                                                                                                                                                                                                                                  | 2                                      |
| n-Eicosane                                                                                                                                                                                                                                                                                                                    | 2                                      |
| Octacosane - d58                                                                                                                                                                                                                                                                                                              | 2                                      |
| Dotriacontane - d66                                                                                                                                                                                                                                                                                                           | 2                                      |
| 1-tetradecanol                                                                                                                                                                                                                                                                                                                | 10                                     |
| 1-octadecanol                                                                                                                                                                                                                                                                                                                 | 10                                     |
| 1-docosanol                                                                                                                                                                                                                                                                                                                   | 10                                     |
| 1-hexacosanol                                                                                                                                                                                                                                                                                                                 | 10                                     |
| Dodecanoic acid                                                                                                                                                                                                                                                                                                               | 10                                     |
| Hexadecanoic acid                                                                                                                                                                                                                                                                                                             | 10                                     |
| Eicosanoic acid                                                                                                                                                                                                                                                                                                               | 10                                     |
| Anthraquinone                                                                                                                                                                                                                                                                                                                 | 10                                     |
| Dimethyl glutaric acid                                                                                                                                                                                                                                                                                                        | 10                                     |
| Ketoglutaric acid                                                                                                                                                                                                                                                                                                             | 10                                     |
| Cis-pinonic acid                                                                                                                                                                                                                                                                                                              | 10                                     |
| Benzophenone                                                                                                                                                                                                                                                                                                                  | 10                                     |
| Tridecanal                                                                                                                                                                                                                                                                                                                    | 10                                     |
| Phthalimide                                                                                                                                                                                                                                                                                                                   | 10                                     |
| Vanillin                                                                                                                                                                                                                                                                                                                      | 10                                     |
| Cholesterol                                                                                                                                                                                                                                                                                                                   | 10                                     |
| Glyceric acid                                                                                                                                                                                                                                                                                                                 | 10                                     |
| Beta-caryophyllene                                                                                                                                                                                                                                                                                                            | 10                                     |
| Benzoic acid                                                                                                                                                                                                                                                                                                                  | 10                                     |
| 4-methoxyphenol                                                                                                                                                                                                                                                                                                               | 10                                     |
| Phthalic acid                                                                                                                                                                                                                                                                                                                 | 10                                     |
| 2-pentadecanone                                                                                                                                                                                                                                                                                                               | 10                                     |
| 1,6-dioxaspiro[4,4]nonene-2,7                                                                                                                                                                                                                                                                                                 | 10                                     |
| Myrcene                                                                                                                                                                                                                                                                                                                       | 10                                     |
| Squalene                                                                                                                                                                                                                                                                                                                      | 10                                     |
| EPA PAH Mix (1-methylnaphthalene, 2-methylnaphthalene, acenaphthene, acenaphthylene, anthracene, benzo(a)anthracene, benzo(a)pyrene, benzo(b/e)fluoranthene, benzo(g,h,i)perylene, benzo(k)fluoranthene, chrysene, dibenzo(a,h)anthracene, fluoranthene, fluorene, indeno(1,2,3-cd)pyrene, naphthalene, phenanthrene, pyrene) | 2 (each component)                     |



### Section S5: TAG Compound Identifications

Table S2. Full compound list obtained using TAG data (both indoor and outdoor chromatograms) for this study. CAS identification numbers and common names (in bold font in parentheses within “Compound Name” column) are provided where available. Ions used to identify compounds in chromatograms are given in the “Ions” column, with the base peak (most abundant ion) in bold and the quantification ion underlined for compounds included in PMF analyses. Compounds were identified to varying degrees of certainty using retention times and according to the following criteria: A) the compound was positively identified using standard injections; B) the compound was identified with a match quality above 75% using mass spectral libraries; C) the compound was identified with a low-to-moderate match quality, between 25% and 75%, using mass spectral libraries. Other properties provided include compound molecular formula, molecular weight (MW), and subcooled liquid vapor pressures. Vapor pressures were predicted using the Advanced Chemistry Development (ACD/Labs) Software V11.02 (© 1994-2017 ACD/Labs) through the SciFinder website;<sup>5</sup> a cell marked “NF” denotes that no vapor pressure information was found for that compound.

| #                       | Compound Name                          | CAS        | Ions                               | Confidence | Molec. Formula | MW (g mol <sup>-1</sup> ) | Predicted pL <sup>o</sup> (torr) |
|-------------------------|----------------------------------------|------------|------------------------------------|------------|----------------|---------------------------|----------------------------------|
| <b>Linear Alkanes</b>   |                                        |            |                                    |            |                |                           |                                  |
| 1                       | Dodecane                               | 112-40-3   | <b>57</b> ; 43; 71; 85; 170        | A          | C12H26         | 170                       | 2.09E-01                         |
| 2                       | Tridecane                              | 211-093-4  | <b>57</b> ; 43; 71; 85; 184        | B          | C13H28         | 184                       | 8.07E-02                         |
| 3                       | Tetradecane                            | 629-59-4   | <b>57</b> ; 43; 71; 85; 198        | A          | C14H30         | 198                       | 2.85E-02                         |
| 4                       | Pentadecane <sup>D,ND</sup>            | 629-62-9   | <u>57</u> ; 43; 71; 85; 212        | B          | C15H32         | 212                       | 1.12E-02                         |
| 5                       | Hexadecane <sup>D,ND</sup>             | 544-76-3   | <b>57</b> ; 43; 71; 85; 226        | A          | C16H34         | 226                       | 4.52E-03                         |
| 6                       | Heptadecane <sup>D,ND</sup>            | 629-78-7   | <u>57</u> ; 43; 71; 85; 240        | B          | C17H36         | 240                       | 1.85E-03                         |
| 7                       | Octadecane <sup>D,ND</sup>             | 593-45-3   | <u>57</u> ; 43; 71; 85; 254        | A          | C18H38         | 254                       | 7.69E-04                         |
| 8                       | Nonadecane <sup>D,ND</sup>             | 629-92-5   | <u>57</u> ; 43; 71; 85; 268        | B          | C19H40         | 268                       | 3.25E-04                         |
| 9                       | Eicosane <sup>D,ND</sup>               | 112-95-8   | <u>57</u> ; 43; 71; 85; 282        | A          | C20H42         | 282                       | 1.40E-04                         |
| 10                      | Heneicosane <sup>D,ND</sup>            | 629-94-7   | <u>57</u> ; 43; 71; 85; 296        | B          | C21H44         | 296                       | 6.14E-05                         |
| 11                      | Docosane <sup>D,ND</sup>               | 629-97-0   | <u>57</u> ; 43; 71; 85; 310        | A          | C22H46         | 310                       | 2.73E-05                         |
| 12                      | Tricosane <sup>D,ND</sup>              | 638-67-5   | <u>57</u> ; 43; 71; 85; 324        | B          | C23H48         | 324                       | 1.24E-05                         |
| 13                      | Tetracosane <sup>D,ND</sup>            | 646-31-1   | <u>57</u> ; 43; 71; 85; 338        | A          | C24H50         | 338                       | 5.69E-06                         |
| 14                      | Pentacosane <sup>ND</sup>              | 629-99-2   | <b>57</b> ; 43; 71; 85; 352        | B          | C25H52         | 352                       | 2.66E-06                         |
| 15                      | Hexacosane                             | 630-01-3   | <b>57</b> ; 43; 71; 85; 366        | A          | C26H54         | 366                       | 1.26E-06                         |
| <b>Branched Alkanes</b> |                                        |            |                                    |            |                |                           |                                  |
| 16                      | Pentadecane, 5-methyl-                 | 25117-33-3 | <b>57</b> ; 71; 85; 168            | C          | C16H34         | 226                       | 6.32E-03                         |
| 17                      | Pentadecane, 3-methyl- <sup>D,ND</sup> | 2882-96-4  | <u>57</u> ; 71; 85; 197            | C          | C16H34         | 226                       | 5.64E-03                         |
| 18                      | Pentadecane, 2,6,10-trimethyl-         | 3892-00-0  | <b>57</b> ; 71; 169; 183; 225; 239 | C          | C18H38         | 254                       | 2.28E-03                         |

| #                                        | Compound Name                                                | CAS        | Ions                                    | Confidence | Molec. Formula | MW (g mol <sup>-1</sup> ) | Predicted pL <sup>o</sup> (torr) |
|------------------------------------------|--------------------------------------------------------------|------------|-----------------------------------------|------------|----------------|---------------------------|----------------------------------|
| <b>Branched Alkanes, cont'd.</b>         |                                                              |            |                                         |            |                |                           |                                  |
| 19                                       | Hexadecane, 4-methyl-                                        | 25117-26-4 | <b>43</b> ; 57; 71; 85; 197             | B          | C17H36         | 240                       | 2.55E-03                         |
| 20                                       | Hexadecane, 3-methyl-                                        | 6418-43-5  | <b>57</b> ; 43; 71; 85; 211             | C          | C17H36         | 240                       | 2.42E-03                         |
| 21                                       | Pentadecane, 2,6,10,14-tetramethyl- (norphytane)             | 1921-70-6  | <b>57</b> ; 71; 113; 183                | B          | C19H40         | 268                       | 2.60E-03                         |
| 22                                       | Heptadecane, 4-methyl-                                       | 26429-11-8 | <b>71</b> ; 43; 57; 85; 210; 211        | C          | C18H38         | 254                       | 9.61E-04                         |
| 23                                       | Hexadecane, 2,6,10,14-tetramethyl- (phytane)<br>D,ND         | 638-36-8   | <b>57</b> ; 183; 197                    | B          | C20H42         | 282                       | 5.26E-04                         |
| <b>Alkenes</b>                           |                                                              |            |                                         |            |                |                           |                                  |
| 24                                       | 1-Dodecene                                                   | 112-41-4   | <b>83</b> ; 41; 55; 69; 97; 168         | C          | C12H24         | 168                       | 2.34E-01                         |
| 25                                       | 1-Tridecene                                                  | 2437-56-1  | <b>83</b> ; 41; 55; 69; 97; 182         | B          | C13H26         | 182                       | 8.56E-02                         |
| 26                                       | 1-Tetradecene <sup>D,ND</sup>                                | 1120-36-1  | <b>55</b> ; 41; 69; <b>83</b> ; 97; 196 | B          | C14H28         | 196                       | 3.23E-02                         |
| 27                                       | 1-Pentadecene                                                | 13360-61-7 | <b>83</b> ; 41; 55; 69; 97; 210         | C          | C15H30         | 210                       | 1.25E-02                         |
| 28                                       | 1-Heptadecene                                                | 6765-39-5  | <b>83</b> ; 41; 55; 69; 97; 238         | C          | C16H32         | 238                       | 2.05E-03                         |
| <b>PAHs, Branched PAHs, and Oxy-PAHs</b> |                                                              |            |                                         |            |                |                           |                                  |
| 29                                       | Naphthalene                                                  | 91-20-3    | <b>128</b> ; 64; 102                    | C          | C10H8          | 128                       | 1.59E-01                         |
| 30-31                                    | Methylnaphthalenes (2), individual configurations unknown    |            | <b>142</b> ; 115; 141                   | C          | C11H10         | 142                       | 6.05E-02                         |
| 32                                       | 2-Naphthalenol                                               | 135-19-3   | <b>144</b> ; 89; 115; 116               | C          | C10H8O         | 144                       | 1.63E-03                         |
| 33-34                                    | Dimethylnaphthalenes (2), individual configurations unknown  |            | <b>156</b> ; 141; 155                   | C          | C12H12         | 156                       | (1.24-1.59)E-02                  |
| 35                                       | Biphenylene                                                  | 259-79-0   | <b>152</b> ; 76; 126; 151               | C          | C12H8          | 152                       | 1.78E-02                         |
| 36-37                                    | Trimethylnaphthalenes (2), individual configurations unknown |            | <b>170</b> ; 155                        | C          | C13H14         | 170                       | 1.67E-02-3.16E-03                |
| 38                                       | 4,6,8-Trimethylazulene                                       | 941-81-1   | <b>170</b> ; 155                        | C          | C13H14         | 170                       | 5.05E-03                         |
| 39                                       | Fluorene                                                     | 86-73-7    | <b>166</b> ; 115; 139; 165              | C          | C13H10         | 166                       | 3.00E-03                         |
| 40                                       | 1-Methyl-9-methoxyfluorene                                   |            | <b>195</b> ; 165; 210                   | C          | C15H14O        | 210                       | 1.82E-04                         |
| 41                                       | 9H-Fluoren-9-one <sup>D,ND</sup>                             | 486-25-9   | <b>180</b> ; 76; 126; 152               | C          | C13H8O         | 180                       | 8.01E-05                         |
| 42                                       | Phenanthrene <sup>D,ND</sup>                                 | 85-01-8    | <b>178</b> ; 76; 89; 152                | A          | C14H10         | 178                       | 2.06E-04                         |
| 43                                       | Anthracene                                                   | 120-12-7   | <b>178</b> ; 76; 89; 152                | A          | C14H10         | 178                       | 2.06E-04                         |

| #                                                 | Compound Name                                                                    | CAS       | Ions                            | Confidence | Molec. Formula | MW (g mol <sup>-1</sup> ) | Predicted pL <sup>o</sup> (torr) |
|---------------------------------------------------|----------------------------------------------------------------------------------|-----------|---------------------------------|------------|----------------|---------------------------|----------------------------------|
| <b>PAHs, Branched PAHs, and Oxy-PAHs, cont'd.</b> |                                                                                  |           |                                 |            |                |                           |                                  |
| 44                                                | Anthracene, dimethyl, configuration unknown <sup>D,ND</sup>                      |           | <u>206</u> ; 69; 81; 83; 205    | C          | C16H14         | 206                       | 2.76E-05                         |
| 45-49                                             | Methylphenanthrenes and Methylanthracenes (5), individual configurations unknown |           | <u>192</u> ; 165                | B          | C15H12         | 192                       | 7.27E-05                         |
| 50                                                | 9,10-Anthracenedione (anthraquinone)                                             | 84-65-1   | <u>208</u> ; 76; 152; 180       | B          | C14H8O2        | 208                       | 6.97E-06                         |
| 51                                                | Fluoranthene <sup>D,ND</sup>                                                     | 205-912-4 | <u>202</u> ; 101; 102           | C          | C16H10         | 202                       | 1.73E-05                         |
| 52                                                | 9,10-Anthracenedione, 1,4-dimethyl-                                              | 1519-36-4 | <u>236</u> ; 165; 178; 193      | C          | C16H12O2       | 236                       | 2.69E-07                         |
| 53                                                | Pyrene <sup>D,ND</sup>                                                           | 129-00-0  | <u>202</u> ; 101; 102           | B          | C16H10         | 202                       | 2.28E-06                         |
| 54-56                                             | Methylpyrenes (3), individual configurations unknown                             |           | <u>216</u> ; 108; 215           | C          | C17H12         | 216                       | (1.48-7.38)E-06                  |
| 57                                                | Retene                                                                           | 483-65-8  | <u>219</u> ; 205; 206; 234      | C          | C18H18         | 234                       | 5.34E-06                         |
| 58                                                | 11H-Benzo[b]fluorene                                                             | 243-17-4  | <u>216</u> ; 108; 215           | C          | C17H12         | 216                       | 3.43E-06                         |
| 59                                                | 11H-Benzo[a]fluorene                                                             | 238-84-6  | <u>216</u> ; 108; 215           | C          | C17H12         | 216                       | 3.43E-06                         |
| 60                                                | 2,2'-Binaphthalene                                                               | 612-78-2  | <u>254</u> ; 126; 228; 253; 255 | C          | C20H14         | 254                       | 3.67E-07                         |
| 61                                                | 9H-Fluorene, 9-(phenylmethylene)-                                                | 1836-87-9 | <u>254</u> ; 252; 253; 255      | C          | C20H14         | 254                       | 5.01E-06                         |
| 62                                                | Benzo[c]phenanthrene <sup>D,ND</sup>                                             | 195-19-7  | <u>228</u> ; 101; 113; 226      | C          | C18H12         | 228                       | 2.02E-07                         |
| 63                                                | Chrysene <sup>D,ND</sup>                                                         | 218-01-9  | <u>228</u> ; 113; 114           | A          | C18H12         | 228                       | 8.50E-08                         |
| <b>Alkylcyclohexanes</b>                          |                                                                                  |           |                                 |            |                |                           |                                  |
| 64                                                | 1,2-Dimethylenecyclohexane                                                       | 2819-48-9 | <u>93</u> ; 79; 108             | C          | C8H12          | 108                       | 9.92E+00                         |
| 65                                                | Cyclohexane, heptyl-                                                             | 5617-41-4 | <u>83</u> ; 55; 82; 182         | C          | C13H26         | 182                       | 4.51E-02                         |
| 66                                                | Cyclohexane, octyl-                                                              | 1795-15-9 | <u>83</u> ; 55; 67; 82; 196     | C          | C14H28         | 196                       | 1.58E-02                         |
| <b>Alkylbenzenes</b>                              |                                                                                  |           |                                 |            |                |                           |                                  |
| 67                                                | Benzene, heptyl- <sup>D,ND</sup>                                                 | 1078-71-3 | <u>91</u> ; 92; 176             | B          | C13H20         | 176                       | 4.43E-02                         |
| 68                                                | Benzene, octyl-                                                                  | 2189-60-8 | <u>91</u> ; 92; 190             | C          | C14H22         | 190                       | 1.58E-02                         |
| 69                                                | Benzene, nonyl-                                                                  | 1081-77-2 | <u>91</u> ; 92; 204             | C          | C15H24         | 204                       | 5.74E-03                         |
| 70                                                | Benzene, (1-propyloctyl)-                                                        | 4536-86-1 | <u>91</u> ; 105; 133; 189; 232  | C          | C17H28         | 232                       | 1.39E-03                         |
| 71                                                | Benzene, decyl-                                                                  | 104-72-3  | <u>91</u> ; 92; 184             | C          | C16H26         | 218                       | 2.12E-03                         |
| 72                                                | Benzene, (1-pentylheptyl)- <sup>D,ND</sup>                                       | 2719-62-2 | <u>91</u> ; 105; 161; 175; 246  | C          | C18H30         | 246                       | 5.00E-04                         |
| 73                                                | Benzene, (1-butylloctyl)- <sup>D,ND</sup>                                        | 2719-63-3 | <u>91</u> ; 105; 147; 189       | C          | C18H30         | 246                       | 5.00E-04                         |

| #                             | Compound Name                                     | CAS        | Ions                            | Confidence | Molec. Formula | MW (g mol <sup>-1</sup> ) | Predicted pL <sup>o</sup> (torr) |
|-------------------------------|---------------------------------------------------|------------|---------------------------------|------------|----------------|---------------------------|----------------------------------|
| <b>Alkylbenzenes, cont'd.</b> |                                                   |            |                                 |            |                |                           |                                  |
| 74                            | Benzene, (1-propylonyl)-                          | 2719-64-4  | <b>91</b> ; 133; 203            | C          | C18H30         | 246                       | 5.00E-04                         |
| 75                            | Benzene, (1-ethyldecyl)-                          | 2400-00-2  | <b>91</b> ; 119; 217; 246       | C          | C18H30         | 246                       | 5.00E-04                         |
| 76                            | Benzene, undecyl-                                 | 6742-54-7  | <b>91</b> ; 92; 232             | C          | C17H28         | 232                       | 7.91E-04                         |
| 77                            | Benzene, (1-pentylonyl)-                          | 4534-49-0  | <b>91</b> ; 105; 161; 260       | C          | C19H32         | 260                       | 1.79E-04                         |
| 78                            | Benzene, (1-butylonyl)-                           | 4534-50-3  | <b>91</b> ; 92; 147             | C          | C19H32         | 260                       | 1.79E-04                         |
| 79                            | Benzene, (1-propyldecyl)-                         | 4534-51-4  | <b>91</b> ; 92; 133             | C          | C19H32         | 260                       | 1.79E-04                         |
| 80                            | Benzene, (1-ethylundecyl)-                        | 4534-52-5  | <b>91</b> ; 119; 231; 260       | C          | C19H32         | 260                       | 1.79E-04                         |
| 81                            | Benzene, (1-methyldodecyl)-                       | 4534-53-6  | <b>105</b> ; 91; 260            | C          | C19H32         | 260                       | 1.79E-04                         |
| 82                            | Benzene, dicyclohexyl                             | 1087-02-1  | <b>242</b> ; 91; 117; 159       | C          | C18H26         | 242                       | 3.23E-05                         |
| 83                            | Benzene, (1-methyltridecyl)- <sup>D,ND</sup>      | 4534-59-2  | <b>105</b> ; 91; 274            | C          | C20H34         | 274                       | 6.43E-05                         |
| <b>Other Phenyls</b>          |                                                   |            |                                 |            |                |                           |                                  |
| 84                            | Benzene, (1-methylethenyl)- (alpha methylstyrene) | 98-83-9    | <b>118</b> ; 78; 91; 103        | C          | C9H10          | 118                       | 2.82E+01                         |
| 85                            | p-Cymene                                          | 99-87-6    | <b>119</b> ; 134                | C          | C10H14         | 134                       | 1.65E+01                         |
| 86                            | Trimethylbenzaldehyde, configuration unknown      |            | <b>120</b> ; 77; 91; 105        | C          | C9H12          | 120                       | (2.08-3.57)E-02                  |
| 87-88                         | Dimethylstyrenes (2), configurations unknown      |            | <b>117</b> ; 91; 92; 116; 132   | C          | C10H12         | 132                       | (5.54-6.59)E-01                  |
| 89                            | Benzene, (2-ethylbutyl)-                          | 19219-85-3 | <b>92</b> ; 91; 162             | C          | C12H18         | 162                       | 1.89E-01                         |
| 90                            | Benzene, 1,4-bis-1-methylethenyl-                 | 1605-18-1  | <b>158</b> ; 115; 117; 128; 143 | C          | C12H14         | 158                       | 6.06E-02                         |
| 91                            | Benzene, trimethyl(1-methylethyl)-                | 33991-29-6 | <b>147</b> ; 162                | C          | C12H18         | 162                       | NF                               |
| 92                            | Biphenyl                                          | 92-52-4    | <b>154</b> ; 76; 152; 153       | B          | C12H10         | 154                       | 2.27E-02                         |
| 93                            | 1,1'-Biphenyl, 4-methyl-                          | 644-08-6   | <b>168</b> ; 152; 153; 167      | B          | C13H12         | 168                       | 1.32E-02                         |
| 94                            | Benzene, [1-(2,4-cyclopentadien-1-ylidene)ethyl]- | 2320-32-3  | <b>153</b> ; 152; 166; 167; 168 | C          | C13H12         | 168                       | 3.70E-03                         |
| 95                            | 2-(p-Tolylmethyl)-p-xylene                        | 721-45-9   | <b>195</b> ; 210                | C          | C16H18         | 210                       | 8.34E-04                         |
| 96                            | 1,1'-Biphenyl, 2,2'-diethyl-                      | 13049-35-9 | <b>181</b> ; 165; 195; 210      | C          | C16H18         | 210                       | 2.26E-04                         |
| 97                            | Benzene, 1,1'-cyclohexylidenebis- <sup>D,ND</sup> | 21113-55-3 | <b>236</b> ; 167; 168; 178; 180 | C          | C18H20         | 236                       | 1.28E-04                         |
| 98                            | 1-(o-Biphenyl)-2-phenylethyne                     | 10271-65-5 | <b>253</b> ; 252; 254           | C          | C20H14         | 254                       | 4.04E-07                         |

| #                             | Compound Name                                                           | CAS        | Ions                                  | Confidence | Molec. Formula | MW (g mol <sup>-1</sup> ) | Predicted pL <sup>o</sup> (torr) |
|-------------------------------|-------------------------------------------------------------------------|------------|---------------------------------------|------------|----------------|---------------------------|----------------------------------|
| <b>Other Phenyls, cont'd.</b> |                                                                         |            |                                       |            |                |                           |                                  |
| 99                            | 1H-Indene, 2,3-dihydro-1,1,3-trimethyl-3-phenyl- <sup>D,ND</sup>        | 3910-35-8  | <u>221</u> ; 91; 143; 235; 236        | C          | C18H20         | 236                       | 1.23E-03                         |
| <b>Other Hydrocarbons</b>     |                                                                         |            |                                       |            |                |                           |                                  |
| 100                           | Naphthalene, 1,2,3,4-tetrahydro-1,1,6-trimethyl- (alpha ionene)         | 475-03-6   | <u>159</u> ; 105; 115; 129; 131; 174  | C          | C13H18         | 174                       | 5.33E-02                         |
| 101                           | Sandaracopimaradiene <sup>D,ND</sup>                                    | 1686-56-2  | <u>137</u> ; 136; 257; 272            | C          | C20H32         | 272                       | 2.11E-04                         |
| 102                           | 15-Isobutyl-(13 $\alpha$ H)-isocopalane                                 | 87953-47-7 | <u>191</u> ; 55; 69; 95; 109; 332     | C          | C24H44         | 332                       | 8.21E-06                         |
| <b>Acids</b>                  |                                                                         |            |                                       |            |                |                           |                                  |
| 103                           | Hexanoic acid                                                           | 142-62-1   | <u>60</u> ; 73; 87                    | C          | C6H12O2        | 116                       | 1.58E-01                         |
| 104                           | Hexanoic acid, 2-ethyl-                                                 | 149-57-5   | <u>88</u> ; 73; 101; 116              | C          | C8H16O2        | 144                       | 2.70E-02                         |
| 105                           | Octanoic acid <sup>D,ND</sup>                                           | 124-07-2   | <u>60</u> ; 41; 43; 73; 85; 101; 115  | B          | C8H16O2        | 144                       | 2.20E-02                         |
| 106                           | Nonanoic acid                                                           | 112-05-0   | <u>60</u> ; 57; 73; 115               | B          | C9H18O2        | 158                       | 8.67E-03                         |
| <b>Aldehydes</b>              |                                                                         |            |                                       |            |                |                           |                                  |
| 107                           | Benzaldehyde                                                            | 100-52-7   | <u>77</u> ; 105; 106                  | B          | C7H6O          | 106                       | 9.74E-01                         |
| 108                           | Nonanal <sup>D,ND</sup>                                                 | 124-19-6   | <u>57</u> ; 70; 82; 98; 114           | B          | C9H18O         | 142                       | 5.32E-01                         |
| 109                           | Dodecanal <sup>D,ND</sup>                                               | 112-54-9   | <u>82</u> ; 57; 68; 96; 110; 140      | C          | C12H24O        | 184                       | 3.44E-02                         |
| 110                           | Benzeneethanal, 4-[1,1-dimethylethyl]-.alpha.-methyl-                   | 61307-73-1 | <u>147</u> ; 117; 175; 190            | C          | C13H18O        | 190                       | 7.30E-03                         |
| 111                           | Tridecanal                                                              | 10486-19-8 | <u>82</u> ; 57; 68; 96; 110; 154; 170 | A          | C13H26O        | 198                       | 1.46E-02                         |
| 112                           | Heptanal, 2-(phenylmethylene)-                                          | 122-40-7   | <u>117</u> ; 115; 129; 202            | C          | C14H18O        | 202                       | 2.33E-03                         |
| 113                           | Octanal, 2-(phenylmethylene)- (Hexyl cinnamic aldehyde) <sup>D,ND</sup> | 101-86-0   | <u>129</u> ; 91; 115; 117; 145; 216   | B          | C15H20O        | 216                       | 6.97E-04                         |
| <b>Phthalates</b>             |                                                                         |            |                                       |            |                |                           |                                  |
| 114                           | Phthalic Acid <sup>D,ND</sup>                                           | 85-44-9    | <u>104</u> ; 76; 148                  | A          | C8H6O4         | 166                       | 2.14E-06                         |
| 115                           | Dimethyl phthalate <sup>D,ND</sup>                                      | 131-11-3   | <u>163</u> ; 77; 92; 133; 135; 194    | B          | C10H10O4       | 194                       | 3.31E-03                         |
| 116                           | Diethyl phthalate <sup>D,ND</sup>                                       | 84-66-2    | <u>149</u> ; 150; 177; 221; 222       | B          | C12H14O4       | 222                       | 1.67E-03                         |

| #                          | Compound Name                                                                                          | CAS        | Ions                                            | Confidence | Molec. Formula | MW (g mol <sup>-1</sup> ) | Predicted pL <sup>o</sup> (torr) |
|----------------------------|--------------------------------------------------------------------------------------------------------|------------|-------------------------------------------------|------------|----------------|---------------------------|----------------------------------|
| <b>Phthalates, cont'd.</b> |                                                                                                        |            |                                                 |            |                |                           |                                  |
| 117                        | Diisobutyl Phthalate <sup>D,ND</sup>                                                                   | 84-69-5    | <u>149</u> ; 167; 205; 223                      | C          | C19H28O4       | 320                       | 1.54E-03                         |
| 118                        | Dibutyl Phthalate <sup>D,ND</sup>                                                                      | 84-74-2    | <u>149</u> ; 205; 223                           | C          | C16H22O4       | 278                       | 1.08E-04                         |
| 119                        | Bis-(2-ethylhexyl)phthalate (DEHP) <sup>ND</sup>                                                       | 117-81-7   | <u>149</u> ; 104; 113; 167; 279                 | C          | C24H38O4       | 390                       | 3.95E-06                         |
| <b>Other Esters</b>        |                                                                                                        |            |                                                 |            |                |                           |                                  |
| 120                        | Nonanoic acid, methyl ester                                                                            | 1731-84-6  | <u>74</u> ; 87; 101; 129; 141; 143              | C          | C9H12O3        | 168                       | 1.93E-01                         |
| 121                        | Benzoic acid, butyl ester                                                                              | 136-60-7   | <u>105</u> ; 77; 123                            | B          | C11H14O2       | 178                       | 2.17E-02                         |
| 122                        | Dodecanoic acid, methyl ester <sup>D,ND</sup>                                                          | 111-82-0   | <u>74</u> ; 57; 41; 43; 87; 74;                 | B          | C13H26O2       | 214                       | 1.05E-02                         |
| 123                        | Propanoic acid, 2-methyl-, 1-(1,1-dimethylethyl)-2-methyl-1,3-propanediyl ester (TXIB) <sup>D,ND</sup> | 74381-40-1 | <u>71</u> ; 111; 143; 159; 243                  | B          | C16H30O4       | 286                       | 3.88E-03                         |
| 124                        | Dodecanoic acid, 1-methylethyl ester (isopropyl laurate)                                               | 10233-13-3 | <u>43</u> ; <u>242</u> ; 60; 102; 129; 201; 202 | C          | C15H30O2       | 242                       | 3.58E-03                         |
| 125                        | Benzoic acid, 2-ethylhexyl ester <sup>D,ND</sup>                                                       | 5444-75-7  | <u>105</u> ; <u>70</u> ; 77; 112; 123           | B          | C15H22O2       | 234                       | 5.07E-04                         |
| 126                        | Benzeneacetic acid, 2-phenylethyl ester                                                                | 102-20-5   | <u>104</u> ; 77; 91; 105                        | C          | C16H16O2       | 240                       | 2.30E-05                         |
| 127                        | Benzyl Benzoate <sup>D,ND</sup>                                                                        | 120-51-4   | <u>105</u> ; 77; 91; 194; 212                   | B          | C14H12O2       | 212                       | 2.50E-04                         |
| 128                        | Isopropyl myristate <sup>D,ND</sup>                                                                    | 110-27-0   | <u>102</u> ; 43; 60; 129; 211; 228; 229         | B          | C17H34O2       | 270                       | 3.29E-04                         |
| 129                        | Hexadecanoic acid, methyl ester (methyl palmitate) <sup>ND,D</sup>                                     | 112-39-0   | <u>74</u> ; 43; 55; 87; 143; 227; 239; 270      | B          | C17H34O2       | 270                       | 1.49E-04                         |
| 130                        | Isopropyl palmitate <sup>D,ND</sup>                                                                    | 142-91-6   | <u>43</u> ; <u>102</u> ; 60; 129; 256; 298      | C          | C19H38O2       | 298                       | 8.44E-05                         |
| 131                        | Hexadecanoic acid, 14-methyl-, methyl ester                                                            | 2490-49-5  | <u>74</u> ; 87; 143; 241; 284                   | C          | C18H36O2       | 284                       | 2.15E-04                         |
| <b>Ketones</b>             |                                                                                                        |            |                                                 |            |                |                           |                                  |
| 132                        | 2-Nonanone                                                                                             | 821-55-6   | <u>58</u> ; 43; 71; 142                         | C          | C9H18O         | 142                       | 6.45E-01                         |
| 133                        | Ethanone, 1-(4-methylphenyl)- <sup>D,ND</sup>                                                          | 577-16-2   | <u>119</u> ; 91; 134                            | C          | C9H10O         | 134                       | 1.87E-01                         |
| 134                        | 2-Decanone <sup>D,ND</sup>                                                                             | 693-54-9   | <u>58</u> ; 43; 71; 85; 156                     | C          | C10H20O        | 156                       | 2.48E-01                         |
| 135                        | 2-Undecanone                                                                                           | 112-12-9   | <u>58</u> ; 43; 71; 170                         | C          | C11H22O        | 170                       | 9.78E-02                         |
| 136                        | Bicyclo[3.2.0]heptan-2-one, 1,4,4-trimethyl-                                                           | 52171-52-1 | <u>82</u> ; 95; 109; 152                        | C          | C10H16O        | 152                       | 2.88E-01                         |
| 137                        | Ethanone, 1-[4-(1-methylethenyl)phenyl]-                                                               | 645-13-6   | <u>145</u> ; 91; 115; 160                       | C          | C11H12O        | 160                       | 8.64E-03                         |

| #                                               | Compound Name                                                                                     | CAS        | Ions                                      | Confidence | Molec. Formula | MW (g mol <sup>-1</sup> ) | Predicted pL <sup>o</sup> (torr) |
|-------------------------------------------------|---------------------------------------------------------------------------------------------------|------------|-------------------------------------------|------------|----------------|---------------------------|----------------------------------|
| <b>Other Ketones, cont'd.</b>                   |                                                                                                   |            |                                           |            |                |                           |                                  |
| 138                                             | 1(2H)-Naphthalenone, 3,4-dihydro- (alpha tetralone) <sup>D,ND</sup>                               | 529-34-0   | <u>118</u> ; 146                          | C          | C10H10O        | 146                       | 1.60E-02                         |
| 139                                             | 5,9-Undecadien-2-one, 6,10-dimethyl- (geranyl lactone) <sup>D,ND</sup>                            | 3796-70-1  | <u>43</u> ; 69; 107; 125; 136; 151        | C          | C13H22O        | 194                       | 1.57E-02                         |
| 140                                             | 2,5-Cyclohexadiene-1,4-dione, 2,6-bis(1,1-dimethylethyl)- (2,6-Di-tert-butylbenzoquinone)         | 719-22-2   | <u>177</u> ; 135; 149; 163; 192; 205; 220 | B          | C14H20O2       | 220                       | 2.81E-03                         |
| 141                                             | 2,6-di-t-butyl-4-methylene-2,5-cyclohexadiene-1-one (BHT-quinone)                                 | 2607-52-5  | <u>161</u> ; 175; 189; 203; 218           | B          | C15H24         | 218                       | 7.89E-04                         |
| 142                                             | 6-methyl-.gamma.-ionone                                                                           | 27417-37-4 | <u>135</u> ; 107; 123; 150; 191; 206      | B          | C14H22O        | 206                       | 4.05E-03                         |
| 143                                             | 2-Pentadecanone                                                                                   | 2345-28-0  | <u>58</u> ; 168; 226                      | A          | C15H30O        | 226                       | 3.04E-03                         |
| 144                                             | Benzophenone <sup>D,ND</sup>                                                                      | 119-61-9   | <u>105</u> ; 77; 182                      | A          | C13H10O        | 182                       | 8.23E-04                         |
| 145                                             | 1-Penten-3-one, 1-(2,6,6-trimethyl-1-cyclohexen-1-yl)- (beta methyl ionone)                       | 127-43-5   | <u>191</u> ; 109; 119; 121; 135; 191      | C          | C14H22O        | 206                       | 1.08E-03                         |
| 146                                             | Ethanone, 1-(5,6,7,8-tetrahydro-3,5,5,6,8,8-hexamethyl-2-naphthalenyl)- (tonalid) <sup>D,ND</sup> | 21145-77-7 | <u>243</u> ; 159; 187; 201; 258           | B          | C18H26O        | 258                       | 2.86E-05                         |
| <b>Multifunctional/Other Oxidized Compounds</b> |                                                                                                   |            |                                           |            |                |                           |                                  |
| 147                                             | Phenol                                                                                            | 108-95-2   | <u>94</u> ; 39; 66                        | C          | C6H6O          | 94                        | 6.14E+01                         |
| 148                                             | 1-Hexanol, 2-ethyl-                                                                               | 104-76-7   | <u>57</u> ; 41; 70; 83; 98; 112           | B          | C8H18O         | 130                       | 2.07E-01                         |
| 149                                             | Benzenemethanol                                                                                   | 100-51-6   | <u>79</u> ; 77; 107; 108                  | C          | C7H8O          | 108                       | 1.58E-01                         |
| 150                                             | Phenol, 2-(1-methylethyl)-                                                                        | 88-69-7    | <u>121</u> ; 103; 136                     | C          | C9H12O         | 136                       | 1.12E-01                         |
| 151                                             | Levoglucosenone <sup>ND</sup>                                                                     | 37112-31-5 | <u>98</u> ; 39; 53; 68; 96                | B          | C6H6O3         | 126                       | 1.73E-02                         |
| 152                                             | Benzoic acid, 2-hydroxy-, methyl ester                                                            | 119-36-8   | <u>120</u> ; 65; 92; 93; 121; 152         | C          | C8H8O3         | 152                       | 7.00E-02                         |
| 153                                             | Benzene, 1-methoxy-4-(1-propenyl)- (anethole)                                                     | 104-46-1   | <u>148</u> ; 117; 121; 133; 147           | C          | C10H12O        | 148                       | 6.87E-02                         |
| 154                                             | Ethanol, 2-phenoxy- <sup>D,ND</sup>                                                               | 122-99-6   | <u>94</u> ; 77; 138                       | B          | C8H10O2        | 138                       | 1.55E-02                         |
| 155                                             | (2Z,4Z)-3-Methylhexa-2,4-dien-1,6-diol                                                            |            | <u>97</u> ; 71; 81; 95; 98; 110           | C          | C7H12O2        | 128                       | NF                               |
| 156                                             | 2-Propanol, 1,1'-oxybis- (dipropylene glycol)                                                     | 25265-71-8 | <u>59</u> ; 31; 41; 45; 103               | C          | C6H14O3        | 134                       | NF                               |

| #                                                        | Compound Name                                                                                 | CAS        | Ions                                     | Confidence | Molec. Formula | MW (g mol <sup>-1</sup> ) | Predicted pL <sup>o</sup> (torr) |
|----------------------------------------------------------|-----------------------------------------------------------------------------------------------|------------|------------------------------------------|------------|----------------|---------------------------|----------------------------------|
| <b>Multifunctional/Other Oxidized Compounds, cont'd.</b> |                                                                                               |            |                                          |            |                |                           |                                  |
| 157                                                      | 2-Propanol, 1-[1-methyl-2-(2-propenyloxy)ethoxy]-                                             | 55956-25-7 | <b>59</b> ; 45; 57; 103                  | C          | C9H18O3        | 192                       | 7.31E-03                         |
| 158                                                      | Benzaldehyde, 4-methoxy- (anisaldehyde)                                                       | 123-11-5   | <b>135</b> ; 77; 92; 136                 | C          | C8H8O2         | 136                       | 2.49E-02                         |
| 159                                                      | 2(3H)-Furanone, 5-butyldihydro- (gamma octanolactone)                                         | 104-50-7   | <b>85</b> ; 100; 141                     | C          | C8H14O2        | 142                       | 4.08E-02                         |
| 160                                                      | Benzene, 1-methoxy-4-(2-propenyl)- (allylanisole)                                             | 140-67-0   | <b>148</b> ; 77; 91; 115; 117; 121; 133  | B          | C10H12O        | 148                       | 2.10E-01                         |
| 161                                                      | Propanoic acid, 2-methyl-, 2,2-dimethyl-1-(2-hydroxy-1-methylethyl)propyl ester <sup>ND</sup> | 74367-33-2 | <b>71</b> ; 43; 56; 83; 89; 98; 143; 173 | B          | C12H24O3       | 216                       | 1.09E-03                         |
| 162                                                      | 2[3H]-Furanone, dihydro-5-pentyl- (gamma nonalactone) <sup>D,ND</sup>                         | 108-29-2   | <b>85</b> ; 100; 114; 128; 138           | B          | C9H16O2        | 156                       | 8.58E-03                         |
| 163                                                      | Propanoic acid, 2-methyl-, 3-hydroxy-2,4,4-trimethylpentyl ester                              | 74367-34-3 | <b>71</b> ; 43; 56; 89; 143; 173         | B          | C12H24O3       | 216                       | 3.78E-03                         |
| 164                                                      | Benzene, 1,1'-oxybis-                                                                         | 101-84-8   | <b>170</b> ; 141; 142                    | B          | C12H10O        | 170                       | 2.23E-02                         |
| 165                                                      | Benzaldehyde, 3,4-dimethoxy- (vanillin methyl ether)                                          | 120-14-9   | <b>166</b> ; 165                         | C          | C9H10O3        | 166                       | 3.66E-03                         |
| 166                                                      | 2H-1-Benzopyran-2-one (coumarin) <sup>D,ND</sup>                                              | 91-64-5    | <b>146</b> ; 89; 90; 118; 119            | B          | C9H6O2         | 146                       | 1.30E-03                         |
| 167                                                      | 2(3H)-Furanone, 5-hexyldihydro- (gamma decalactone)                                           | 706-14-9   | <b>85</b> ; 128                          | C          | C10H18O2       | 170                       | 8.52E-03                         |
| 168                                                      | Isobutanoic acid, phenoxyethanol ester <sup>D,ND</sup>                                        | 103-60-6   | <b>115</b> ; 77; 94; 105                 | C          | C12H16O3       | 208                       | 5.62E-03                         |
| 169                                                      | Benzoic acid, 4-ethoxy-, ethyl ester                                                          | 23676-09-7 | <b>121</b> ; 138; 149; 166; 194          | C          | C11H14O3       | 194                       | 5.23E-03                         |
| 170                                                      | Dibenzofuran <sup>D,ND</sup>                                                                  | 132-64-9   | <b>168</b> ; 84; 139                     | B          | C12H8O         | 168                       | 4.40E-03                         |
| 171                                                      | Phenol, 4-(1,1,3,3-tetramethylbutyl)-                                                         | 140-66-9   | <b>135</b> ; 107; 136                    | C          | C14H22O        | 206                       | 1.98E-03                         |
| 172                                                      | Cyclopentaneacetic acid, 3-oxo-2-pentyl-, methyl ester <sup>D,ND</sup>                        | 24851-98-7 | <b>153</b> ; 55; 83; 96; 156             | B          | C13H22O3       | 226                       | 7.10E-04                         |
| 173                                                      | Octane, 1,1'-oxybis-                                                                          | 629-82-3   | <b>57</b> ; 71; 83; 84; 112; 113         | C          | C16H34O        | 242                       | 4.53E-03                         |
| 174                                                      | n-Hexyl salicylate                                                                            | 6259-76-3  | <b>120</b> ; 138; 222                    | C          | C13H18O3       | 222                       | 4.91E-04                         |
| 175                                                      | 2-Ethylhexyl salicylate                                                                       | 118-60-5   | <b>120</b> ; 71; 112; 121; 138; 250      | C          | C15H22O3       | 250                       | 8.07E-05                         |



| #                                                        | Compound Name                                                                                         | CAS        | Ions                          | Confidence | Molec. Formula | MW (g mol <sup>-1</sup> ) | Predicted pL <sup>o</sup> (torr) |
|----------------------------------------------------------|-------------------------------------------------------------------------------------------------------|------------|-------------------------------|------------|----------------|---------------------------|----------------------------------|
| <b>Multifunctional/Other Oxidized Compounds, cont'd.</b> |                                                                                                       |            |                               |            |                |                           |                                  |
| 176                                                      | Cyclopenta[g]-2-benzopyran, 1,3,4,6,7,8-hexahydro-4,6,6,7,8,8-hexamethyl (galaxolide) <sup>D,ND</sup> | 1222-05-5  | <u>243</u> ; 213; 258         | B          | C18H26O        | 258                       | 4.14E-04                         |
| <b>Terpenes, Oxidized Terpenes, and Terpenoids</b>       |                                                                                                       |            |                               |            |                |                           |                                  |
| 177                                                      | Limonene <sup>D,ND</sup>                                                                              | 138-86-3   | <u>68</u> ; 93; 107; 121; 136 | B          | C10H16         | 136                       | 1.54E+00                         |
| 178                                                      | beta-Ocimene                                                                                          | 3779-61-1  | <u>93</u> ; 136               | C          | C10H16         | 136                       | 1.56E+00                         |
| 179                                                      | Cyclohexanol, 3,3,5-trimethyl-(homomenthol)                                                           | 116-02-9   | <u>109</u> ; 83; 124          | C          | C9H18O         | 142                       | 1.73E-01                         |
| 180                                                      | 7-Octen-2-ol, 2,6-dimethyl-(dihydromyrcenol)                                                          | 18479-58-8 | <u>59</u> ; 67; 81; 123       | C          | C10H20O        | 156                       | 1.66E-01                         |
| 181                                                      | Linalool                                                                                              | 78-70-6    | <u>71</u> ; 93; 121           | C          | C10H18O        | 154                       | 9.05E-02                         |
| 182                                                      | 2-Cyclohexen-1-one, 3,5,5-trimethyl-(isophorone) <sup>ND</sup>                                        | 78-59-1    | <u>82</u> ; 39; 95; 138       | C          | C8H10O2        | 138                       | 1.50E-01                         |
| 183                                                      | Bicyclo[2.2.1]heptan-2-one, 1,7,7-trimethyl-(camphor)                                                 | 76-22-2    | <u>95</u> ; 69; 81; 108; 152  | C          | C10H16O        | 152                       | 2.25E-01                         |
| 184                                                      | Cyclohexanone, 5-methyl-2-(1-methylethyl)-(isomenthone)                                               | 1196-31-2  | <u>112</u> ; 69; 97; 139; 154 | C          | C10H18O        | 154                       | 2.56E-01                         |
| 185                                                      | Menthol                                                                                               | 15356-70-4 | <u>71</u> ; 81; 95; 123; 138  | B          | C10H20O        | 156                       | 3.23E-02                         |
| 186                                                      | α-Terpineol                                                                                           | 10482-56-1 | <u>59</u> ; 93; 121; 136      | C          | C10H18O        | 154                       | 2.83E-02                         |
| 187                                                      | 2-Cyclohexen-1-one, 2-methyl-5-(1-methylethenyl)- (carvone) <sup>ND</sup>                             | 99-49-0    | <u>82</u> ; 108; 150          | C          | C10H14O        | 150                       | 6.56E-02                         |
| 188                                                      | α-Cedrene <sup>D,ND</sup>                                                                             | 469-61-4   | <u>119</u> ; 93; 105; 161     | B          | C15H24         | 204                       | 1.77E-02                         |
| 189                                                      | β-Cedrene <sup>D,ND</sup>                                                                             | 546-28-1   | <u>161</u> ; 93; 120; 204     | B          | C15H24         | 204                       | 1.71E-02                         |
| <b>N- and S-Containing Compounds</b>                     |                                                                                                       |            |                               |            |                |                           |                                  |
| 190                                                      | 1,2-Benzisothiazole <sup>D,ND</sup>                                                                   | 272-16-2   | <u>135</u> ; 85; 108; 136     | B          | C7H5NS         | 135                       | 5.87E+00                         |
| 191                                                      | 2-methyl-3-oxime-1-cyclohexen-3-one                                                                   | NA         | <u>125</u> ; 67; 79; 81       | C          | C7H11NO        | 154                       | NF                               |
| 192                                                      | 2-Pentanone, 3-(phenylthio)-                                                                          | 62870-22-8 | <u>177</u> ; 194              | C          | C11H14OS       | 194                       | 3.87E-03                         |
| 193                                                      | Benzamide, N-propyl-                                                                                  | 10546-70-0 | <u>105</u> ; 77; 163          | C          | C10H13NO       | 163                       | 1.92E-04                         |
| 194                                                      | Diethyltoluamide (DEET) <sup>D,ND</sup>                                                               | 134-62-3   | <u>119</u> ; 65; 91; 190; 191 | B          | C12H17NO       | 191                       | 1.35E-03                         |
| 195                                                      | 2,3-Dihydro-1H-1-methylcyclopenta[b]quinoxaline                                                       | 26629-21-0 | <u>169</u> ; 184              | C          | C12H12N2       | 184                       | 6.10E-04                         |

| #                                             | Compound Name                                        | CAS      | Ions                              | Confidence | Molec. Formula | MW (g mol <sup>-1</sup> ) | Predicted pL <sup>o</sup> (torr) |
|-----------------------------------------------|------------------------------------------------------|----------|-----------------------------------|------------|----------------|---------------------------|----------------------------------|
| <b>N- and S-Containing Compounds, cont'd.</b> |                                                      |          |                                   |            |                |                           |                                  |
| 196                                           | 1-Azachrysene                                        | 218-08-6 | <b>229</b> ; 200; 201             | C          | C17H11N        | 229                       | 7.47E-08                         |
| <b>Siloxanes</b>                              |                                                      |          |                                   |            |                |                           |                                  |
| 197                                           | Cyclotrisiloxane, hexamethyl- <sup>C</sup>           | 541-05-9 | <b>207</b> ; 133; 191             | B          | C6H18O3Si3     | 222                       | 1.16E+02                         |
| 198                                           | Cyclotetrasiloxane, octamethyl- <sup>C</sup>         | 556-67-2 | <b>281</b> ; 73                   | B          | C8H24O4Si4     | 296                       | 1.57E+01                         |
| 199                                           | Cyclopentasiloxane, decamethyl                       | 541-02-6 | <b>73</b> ; 267; 355              | B          | C10H30O5Si5    | 370                       | 2.85E-01                         |
| 200                                           | Pentasiloxane, dodecamethyl-                         | 141-63-9 | <b>281</b> ; 73; 147; 207; 369    | C          | C12H36O4Si5    | 384                       | 5.12E-03                         |
| 201                                           | Cyclohexasiloxane, dodecamethyl-                     | 540-97-6 | <b>73</b> ; 325; 342; 429         | B          | C12H36O6Si6    | 444                       | 4.60E-02                         |
| 202                                           | Hexasiloxane, tetradecamethyl- <sup>D,ND</sup>       | 107-52-8 | <b>73</b> ; 147; <u>221</u> ; 281 | B          | C14H42O5Si6    | 458                       | 4.48E-02                         |
| 203                                           | Cycloheptasiloxane, tetradecamethyl- <sup>D,ND</sup> | 107-50-6 | <u>73</u> ; 147; 281; 327         | B          | C14H42O7Si7    | 519                       | 2.17E-04                         |
| 204                                           | Heptasiloxane, hexadecamethyl-                       | 541-01-5 | <b>221</b> ; 73; 147; 207         | C          | C16H48O6Si7    | 533                       | 1.16E-02                         |
| 205                                           | Cyclooctasiloxane, hexadecamethyl- <sup>D,ND</sup>   | 556-68-3 | <u>73</u> ; 147; 221; 281; 355    | B          | C16H48O8Si8    | 593                       | 3.70E-03                         |
| 206                                           | Cyclononasiloxane, octadecamethyl-                   | 556-71-8 | <b>73</b> ; 147; 221; 355; 429    | B          | C18H54O9Si9    | 667                       | 9.77E-07                         |

<sup>D</sup> Compound was included in denuded PMF calculations (Figure 4; Section S6, Figure S6A, Figure S7, Table S3).

<sup>ND</sup> Compound was included in non-denuded PMF calculations (Figure 5; Section S6, Figure S6B, Figure S8, Table S3).

<sup>C</sup> Compound loadings in this study have partial or full contribution from system contamination.

## Section S6: Positive Matrix Factorization (PMF) Analysis

### Description of pre-processing techniques

The PMF2 algorithm is fully described in Paatero (1997)<sup>6</sup> and Ulbrich et al. (2009).<sup>7</sup> For our analysis, a matrix with input integrated compound abundances is split into a factor profile matrix and a time series matrix:

$$X = GF + E \quad (\text{S1})$$

Here,  $X$  is the input data matrix with dimensions  $m$  compounds  $\times$   $n$  chromatograms, where each element  $x_{ij}$  of the matrix represents the integrated abundance of the  $j^{\text{th}}$  compound within the  $i^{\text{th}}$  chromatogram. PMF calculations split  $X$  into  $G$ , the time series matrix with dimensions  $n \times p$ , and  $F$ , the factor profile matrix with dimensions  $p \times m$ , according to a user-specified number of factors  $p$ . An input error matrix  $E$  ( $m \times n$ ) is determined using known instrument precision values. For this analysis, we determine the error matrix according to methods described in Williams et al. (2010b).<sup>8</sup> To obtain error matrix element  $e_{ij}$  for the  $j^{\text{th}}$  compound in the  $i^{\text{th}}$  chromatogram with corresponding data element  $x_{ij}$ , we calculate:

$$e_{ij} \equiv 2 \times IP, x_{ij} \leq IP \quad (\text{S2A})$$

$$e_{ij} \equiv \sqrt{(z \times x_{ij})^2 + (IP)^2}, x_{ij} > IP \quad (\text{S2B})$$

Here,  $z$  is the instrument uncertainty, determined based on observed instrument reproducibility, and  $IP$  is the instrument precision. For TAG measurements,  $z$  is assumed to be 10% based on previous work,<sup>9,10</sup> and for VOC adsorbent tube data,  $z$  is determined to be 39% based on a bromofluorobenzene internal standard. In all analyses, for each compound, we define  $IP$  as the limit of detection ( $\text{LOD} \equiv 3 \times$  standard deviation of the baseline abundance) for the integrated ion.

To ensure that PMF results are not driven primarily by compounds with the highest abundances, integrated abundances for each compound were normalized to the highest measured abundance across all chromatograms. Thus, each column of the input data matrices contained values ranging from 0 to 1. Corresponding error matrices were calculated following this normalization.

### PMF Results: $Q/Q_{\text{exp}}$ , $f_{\text{Peak}}$ , and factor loadings

The objective function  $Q$  is defined as the sum of weighed squared residuals: <sup>7,11</sup>

$$Q = \sum_n^{i=1} \sum_m^{j=1} \frac{e_{ij}^2}{\sigma_{ij}^2} \quad (\text{S3})$$

where  $\sigma_{ij}$  is the estimated precision of data point  $x_{ij}$ . If the residuals are normally distributed,  $Q$  is expected to equal the number of degrees of freedom for the solution, and  $Q/Q_{\text{exp}}$  equals 1.<sup>7,11</sup> If errors are underestimated,  $Q/Q_{\text{exp}}$  will exceed 1, and if overestimated,  $Q/Q_{\text{exp}}$  is less than 1. This guideline is often used to justify choosing a number of factors ( $p$ ) for a given solution,<sup>7,8</sup> though a  $Q/Q_{\text{exp}}$  not equal to 1 does not necessarily mean that calculated results are not meaningful, as long as overall  $Q/Q_{\text{exp}}$  does not exceed 10.<sup>8,12</sup>  $Q/Q_{\text{exp}}$  values are provided for each analysis in **Figure S6**, and summed residuals are plotted in **Figures S7, S8, and S9**.

The fPeak parameter allows exploration of solutions taking rotational ambiguity into account during calculations.<sup>7</sup> In this work, fPeak was varied between -1 and 1 in increments of 0.2. Although in previous work, TAG data has not been sensitive to variation in fPeak,<sup>8,13</sup> some effect is observed for VOC adsorbent tube results. PMF solutions presented here were selected to obtain  $Q/Q_{exp}$  values closest to 1 (Table S5).

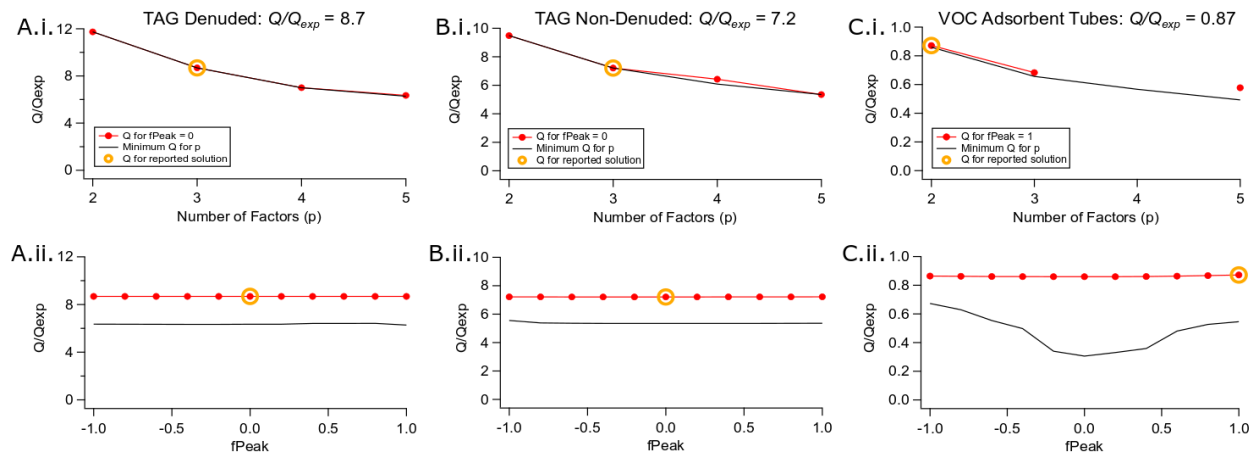

Figure S7.  $Q/Q_{exp}$  with varied  $p$  (panel i) and fPeak (panel ii) for (A) TAG denuded, (B) TAG non-denuded, and (C) VOC adsorbent tube PMF results.

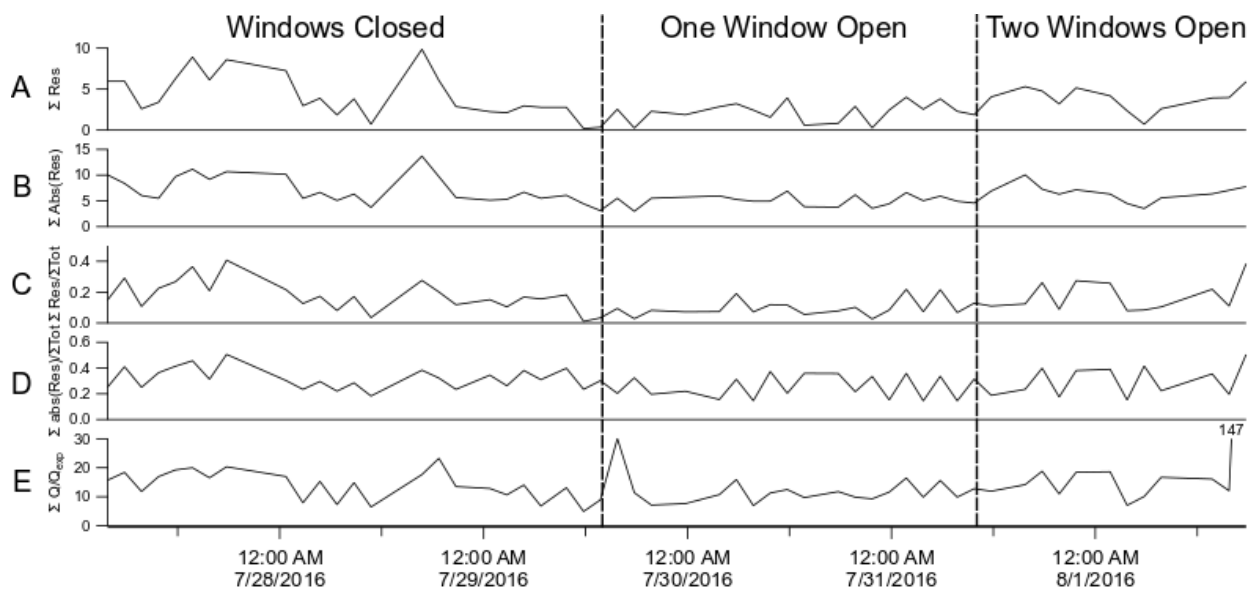

Figure S8. Residual plots for TAG denuded PMF results: (A) summed residuals, (B) sum of the absolute value of residuals, (C) residuals scaled by total signal, (D) sum of the absolute value of residuals scaled by total signal, and (E)  $Q/Q_{exp}$  for individual chromatograms.

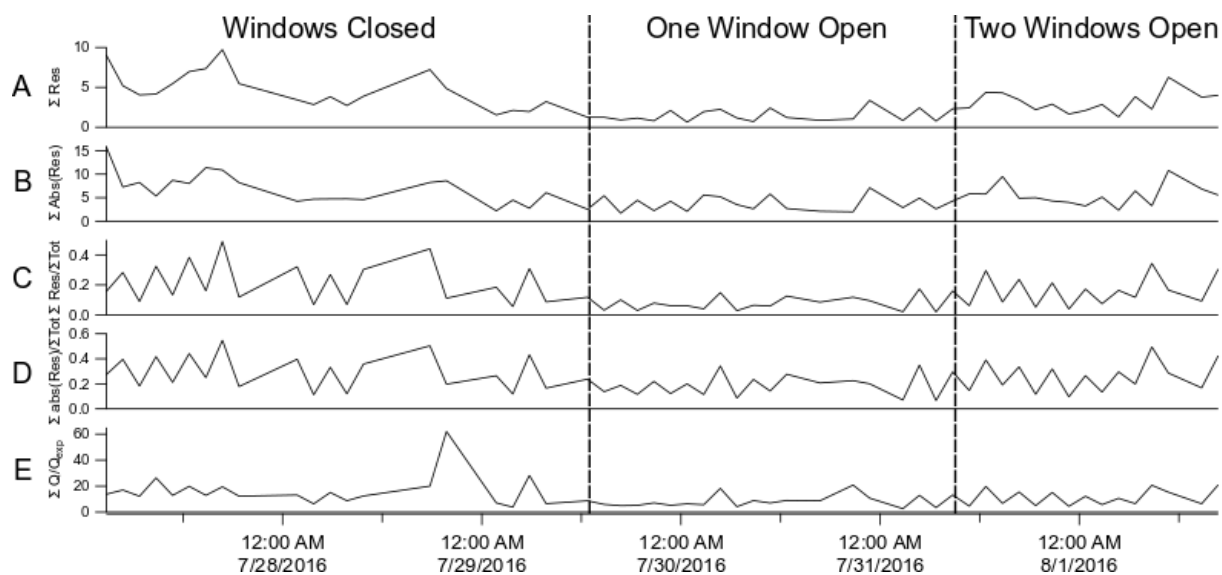

Figure S9. Residual plots for TAG non-denuded PMF results: (A) Summed residuals, (B) sum of the absolute value of residuals, (C) residuals scaled by total signal, (D) sum of the absolute value of residuals scaled by total signal, and (E)  $Q/Q_{exp}$  for individual chromatograms.

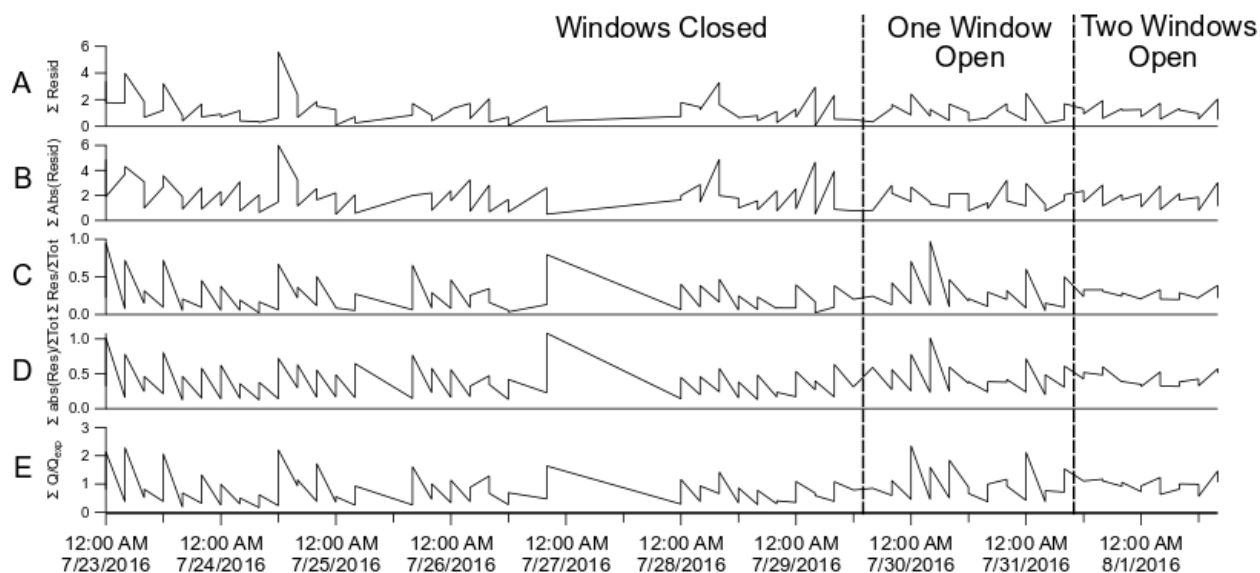

Figure S10. Residual plots for VOC adsorbent tube results: (A) summed residuals, (B) sum of the absolute value of residuals, (C) residuals scaled by total signal, (D) sum of the absolute value of residuals scaled by total signal, and (E)  $Q/Q_{exp}$  for individual chromatograms.

Table S3. Compound factor loadings for TAG denuded PMF results (fPeak=0).

| Compound                             | Factor 1              | Factor 2               | Factor 3              |
|--------------------------------------|-----------------------|------------------------|-----------------------|
| DEET                                 | $4.18 \times 10^{-2}$ | $7.11 \times 10^{-9}$  | $1.55 \times 10^{-3}$ |
| Phthalic acid, diisobutyl ester      | $4.16 \times 10^{-2}$ | $6.32 \times 10^{-4}$  | $1.94 \times 10^{-9}$ |
| Dimethyl Anthracene                  | $3.28 \times 10^{-2}$ | $6.10 \times 10^{-3}$  | $2.91 \times 10^{-2}$ |
| Benzene, 1,1'-cyclohexylidenebis-    | $3.22 \times 10^{-2}$ | $1.65 \times 10^{-2}$  | $2.66 \times 10^{-2}$ |
| Isopropyl Myristate                  | $3.21 \times 10^{-2}$ | $3.58 \times 10^{-3}$  | $1.35 \times 10^{-8}$ |
| Galaxolide                           | $2.98 \times 10^{-2}$ | $1.18 \times 10^{-2}$  | $9.69 \times 10^{-9}$ |
| Dodecanal                            | $2.88 \times 10^{-2}$ | $6.21 \times 10^{-3}$  | $9.90 \times 10^{-3}$ |
| Octanal, 2-phenylmethylene-          | $2.88 \times 10^{-2}$ | $1.84 \times 10^{-2}$  | $3.35 \times 10^{-3}$ |
| Octanoic Acid                        | $2.87 \times 10^{-2}$ | $1.12 \times 10^{-8}$  | $1.00 \times 10^{-3}$ |
| Dibutyl Phthalate                    | $2.82 \times 10^{-2}$ | $1.48 \times 10^{-9}$  | $4.49 \times 10^{-6}$ |
| Nonadecane                           | $2.81 \times 10^{-2}$ | $1.70 \times 10^{-2}$  | $1.54 \times 10^{-2}$ |
| Benzene, (1-methyltridecyl)-         | $2.74 \times 10^{-2}$ | $9.34 \times 10^{-3}$  | $2.24 \times 10^{-2}$ |
| Tonalid                              | $2.71 \times 10^{-2}$ | $1.27 \times 10^{-2}$  | $1.05 \times 10^{-3}$ |
| Hexadecanoic acid, methyl ester      | $2.66 \times 10^{-2}$ | $1.77 \times 10^{-9}$  | $2.30 \times 10^{-3}$ |
| Diethyl Phthalate                    | $2.53 \times 10^{-2}$ | $1.61 \times 10^{-2}$  | $1.21 \times 10^{-3}$ |
| Sandaracopimaradiene                 | $2.50 \times 10^{-2}$ | $1.32 \times 10^{-2}$  | $2.41 \times 10^{-2}$ |
| Nonanal                              | $2.46 \times 10^{-2}$ | $1.70 \times 10^{-3}$  | $1.67 \times 10^{-2}$ |
| Coumarin                             | $1.60 \times 10^{-2}$ | $1.79 \times 10^{-9}$  | $1.95 \times 10^{-3}$ |
| Isopropyl Palmitate                  | $1.13 \times 10^{-2}$ | $5.29 \times 10^{-9}$  | $6.29 \times 10^{-3}$ |
| Levoglucosenone                      | $9.09 \times 10^{-3}$ | $5.01 \times 10^{-10}$ | $2.50 \times 10^{-9}$ |
| Benzyl Benzoate                      | $8.77 \times 10^{-3}$ | $9.23 \times 10^{-9}$  | $2.90 \times 10^{-9}$ |
| 1,2-Benzisothiazole                  | $7.35 \times 10^{-3}$ | $6.59 \times 10^{-9}$  | $4.15 \times 10^{-9}$ |
| Tricosane                            | $4.87 \times 10^{-4}$ | $1.41 \times 10^{-9}$  | $2.05 \times 10^{-8}$ |
| Chrysene                             | $4.02 \times 10^{-4}$ | $1.96 \times 10^{-9}$  | $1.71 \times 10^{-4}$ |
| Tetracosane                          | $1.59 \times 10^{-4}$ | $1.65 \times 10^{-9}$  | $1.11 \times 10^{-4}$ |
| 9,10-Anthracenedione                 | $7.32 \times 10^{-5}$ | $3.22 \times 10^{-9}$  | $4.64 \times 10^{-5}$ |
| Benzene, (1-butyloctyl)-             | $3.95 \times 10^{-3}$ | $5.03 \times 10^{-2}$  | $8.53 \times 10^{-3}$ |
| Benzene, (1-pentylheptyl)-           | $4.34 \times 10^{-3}$ | $4.85 \times 10^{-2}$  | $6.30 \times 10^{-3}$ |
| alpha cedrene                        | $1.33 \times 10^{-3}$ | $4.67 \times 10^{-2}$  | $1.10 \times 10^{-2}$ |
| Heptadecane                          | $7.12 \times 10^{-3}$ | $4.52 \times 10^{-2}$  | $6.44 \times 10^{-3}$ |
| Pentadecane                          | $3.90 \times 10^{-7}$ | $4.51 \times 10^{-2}$  | $1.40 \times 10^{-2}$ |
| beta cedrene                         | $1.47 \times 10^{-2}$ | $4.24 \times 10^{-2}$  | $1.05 \times 10^{-2}$ |
| Phytane                              | $1.51 \times 10^{-2}$ | $3.78 \times 10^{-2}$  | $7.21 \times 10^{-3}$ |
| Benzoic acid, 2-ethylhexyl ester     | $2.18 \times 10^{-2}$ | $3.64 \times 10^{-2}$  | $1.99 \times 10^{-3}$ |
| Pentadecane, 3-methyl-               | $5.63 \times 10^{-8}$ | $3.45 \times 10^{-2}$  | $4.69 \times 10^{-3}$ |
| Hexasiloxane, tetradecamethyl-       | $5.55 \times 10^{-4}$ | $3.28 \times 10^{-2}$  | $2.44 \times 10^{-3}$ |
| Octadecane                           | $1.53 \times 10^{-2}$ | $2.92 \times 10^{-2}$  | $5.44 \times 10^{-3}$ |
| Benzophenone                         | $2.73 \times 10^{-2}$ | $2.90 \times 10^{-2}$  | $1.82 \times 10^{-2}$ |
| Cycloheptasiloxane, tetradecamethyl- | $1.68 \times 10^{-2}$ | $2.89 \times 10^{-2}$  | $1.28 \times 10^{-2}$ |
| Dimethyl Phthalate                   | $2.29 \times 10^{-2}$ | $2.35 \times 10^{-2}$  | $6.91 \times 10^{-9}$ |
| Limonene                             | $1.35 \times 10^{-8}$ | $2.25 \times 10^{-2}$  | $7.46 \times 10^{-8}$ |

| <b>Compound</b>                                  | <b>Factor 1</b>       | <b>Factor 2</b>       | <b>Factor 3</b>       |
|--------------------------------------------------|-----------------------|-----------------------|-----------------------|
| Isobutanoic acid, phenoxyethanol ester           | $1.71 \times 10^{-2}$ | $1.98 \times 10^{-2}$ | $1.77 \times 10^{-8}$ |
| Dodecanoic acid, methyl ester                    | $1.34 \times 10^{-2}$ | $1.92 \times 10^{-2}$ | $8.43 \times 10^{-4}$ |
| TXIB                                             | $1.07 \times 10^{-2}$ | $1.12 \times 10^{-2}$ | $4.02 \times 10^{-4}$ |
| Phthalic Acid                                    | $1.43 \times 10^{-2}$ | $2.52 \times 10^{-2}$ | $6.14 \times 10^{-2}$ |
| Fluoranthene                                     | $8.84 \times 10^{-3}$ | $2.26 \times 10^{-2}$ | $5.76 \times 10^{-2}$ |
| Dibenzofuran                                     | $1.13 \times 10^{-2}$ | $3.46 \times 10^{-2}$ | $5.71 \times 10^{-2}$ |
| 9H-Fluoren-9-one                                 | $1.60 \times 10^{-2}$ | $2.41 \times 10^{-2}$ | $5.60 \times 10^{-2}$ |
| Heptylbenzene                                    | $1.40 \times 10^{-2}$ | $2.25 \times 10^{-2}$ | $5.45 \times 10^{-2}$ |
| Phenanthrene                                     | $2.31 \times 10^{-2}$ | $3.22 \times 10^{-2}$ | $4.73 \times 10^{-2}$ |
| 1-Tetradecene                                    | $1.73 \times 10^{-2}$ | $1.58 \times 10^{-2}$ | $4.51 \times 10^{-2}$ |
| 1(2H)-Naphthalenone, 3,4-dihydro-                | $1.29 \times 10^{-2}$ | $6.02 \times 10^{-4}$ | $4.36 \times 10^{-2}$ |
| Pyrene                                           | $1.19 \times 10^{-2}$ | $9.76 \times 10^{-3}$ | $4.20 \times 10^{-2}$ |
| gamma-nonalactone                                | $5.10 \times 10^{-3}$ | $1.30 \times 10^{-2}$ | $3.61 \times 10^{-2}$ |
| Ethanone, 1-(4-methylphenyl)-                    | $1.33 \times 10^{-2}$ | $9.06 \times 10^{-3}$ | $3.57 \times 10^{-2}$ |
| Eicosane                                         | $2.00 \times 10^{-2}$ | $8.20 \times 10^{-3}$ | $3.17 \times 10^{-2}$ |
| 1H-Indene, 2,3-dihydro-1,1,3-trimethyl-3-phenyl- | $5.33 \times 10^{-3}$ | $6.66 \times 10^{-3}$ | $2.99 \times 10^{-2}$ |
| 2-Decanone                                       | $2.40 \times 10^{-2}$ | $1.28 \times 10^{-2}$ | $2.94 \times 10^{-2}$ |
| Heneicosane                                      | $1.67 \times 10^{-2}$ | $5.62 \times 10^{-3}$ | $2.81 \times 10^{-2}$ |
| Docosane                                         | $1.68 \times 10^{-2}$ | $5.60 \times 10^{-9}$ | $2.64 \times 10^{-2}$ |
| Biphenylene                                      | $5.64 \times 10^{-3}$ | $8.38 \times 10^{-3}$ | $2.61 \times 10^{-2}$ |
| Cyclooctasiloxane, hexadecamethyl-               | $7.97 \times 10^{-3}$ | $1.29 \times 10^{-2}$ | $1.36 \times 10^{-2}$ |
| Benzo[c]phenanthrene                             | $5.31 \times 10^{-4}$ | $1.88 \times 10^{-8}$ | $4.28 \times 10^{-3}$ |

Table S4. Compound factor loadings for TAG non-denuded PMF results (fPeak=0).

| Compound                                          | Factor 1              | Factor 2              | Factor 3               |
|---------------------------------------------------|-----------------------|-----------------------|------------------------|
| 1,2-Benzisothiazole                               | $3.93 \times 10^{-2}$ | $8.04 \times 10^{-4}$ | $7.49 \times 10^{-5}$  |
| Benzyl Benzoate                                   | $2.79 \times 10^{-2}$ | $6.38 \times 10^{-3}$ | $2.31 \times 10^{-9}$  |
| Hexadecanoic acid, methyl ester                   | $2.79 \times 10^{-2}$ | $8.55 \times 10^{-3}$ | $6.33 \times 10^{-3}$  |
| Isopropyl Myristate                               | $2.57 \times 10^{-2}$ | $1.33 \times 10^{-2}$ | $2.29 \times 10^{-3}$  |
| Nonanal                                           | $2.55 \times 10^{-2}$ | $5.81 \times 10^{-3}$ | $5.12 \times 10^{-3}$  |
| Phthalic acid, diisobutyl ester                   | $2.52 \times 10^{-2}$ | $1.12 \times 10^{-2}$ | $8.42 \times 10^{-3}$  |
| Dimethyl Anthracene                               | $2.26 \times 10^{-2}$ | $1.47 \times 10^{-2}$ | $1.93 \times 10^{-2}$  |
| Dibutyl Phthalate                                 | $2.00 \times 10^{-2}$ | $5.59 \times 10^{-3}$ | $1.28 \times 10^{-2}$  |
| Tricosane                                         | $1.98 \times 10^{-2}$ | $9.40 \times 10^{-4}$ | $5.08 \times 10^{-3}$  |
| Hedione                                           | $1.97 \times 10^{-2}$ | $4.72 \times 10^{-9}$ | $2.80 \times 10^{-9}$  |
| DEET                                              | $1.87 \times 10^{-2}$ | $1.72 \times 10^{-2}$ | $4.61 \times 10^{-3}$  |
| 9,10-Anthracenedione                              | $1.86 \times 10^{-2}$ | $1.38 \times 10^{-9}$ | $2.99 \times 10^{-4}$  |
| Isopropyl Palmitate                               | $1.74 \times 10^{-2}$ | $2.64 \times 10^{-3}$ | $7.31 \times 10^{-3}$  |
| 2,2,4-Trimethyl-3,3-pentanediol monoisobutyrate   | $1.68 \times 10^{-2}$ | $1.45 \times 10^{-9}$ | $6.63 \times 10^{-10}$ |
| Octanoic Acid                                     | $1.65 \times 10^{-2}$ | $1.13 \times 10^{-3}$ | $3.60 \times 10^{-3}$  |
| Tetracosane                                       | $1.48 \times 10^{-2}$ | $1.04 \times 10^{-9}$ | $2.90 \times 10^{-9}$  |
| 5,9-Undecadien-2-one, 6,10-dimethyl-              | $1.48 \times 10^{-2}$ | $1.34 \times 10^{-2}$ | $1.35 \times 10^{-3}$  |
| Benzo[c]phenanthrene                              | $1.01 \times 10^{-2}$ | $3.87 \times 10^{-9}$ | $3.40 \times 10^{-3}$  |
| 2-Propanol, 1-[1-methyl-2-(2-propenyloxy)ethoxy]- | $9.40 \times 10^{-3}$ | $2.96 \times 10^{-3}$ | $1.45 \times 10^{-8}$  |
| Di-(2-ethylhexyl)phthalate                        | $8.13 \times 10^{-3}$ | $1.11 \times 10^{-9}$ | $3.58 \times 10^{-4}$  |
| Pentacosane                                       | $2.36 \times 10^{-4}$ | $2.32 \times 10^{-9}$ | $7.05 \times 10^{-5}$  |
| Benzophenone                                      | $1.67 \times 10^{-2}$ | $2.84 \times 10^{-2}$ | $7.83 \times 10^{-3}$  |
| Benzoic acid, 2-ethylhexyl ester                  | $1.50 \times 10^{-2}$ | $2.80 \times 10^{-2}$ | $2.16 \times 10^{-3}$  |
| alpha cedrene                                     | $5.04 \times 10^{-3}$ | $2.78 \times 10^{-2}$ | $3.91 \times 10^{-3}$  |
| Benzene, (1-butyloctyl)-                          | $4.05 \times 10^{-3}$ | $2.64 \times 10^{-2}$ | $3.64 \times 10^{-3}$  |
| Phytane                                           | $5.18 \times 10^{-3}$ | $2.59 \times 10^{-2}$ | $7.28 \times 10^{-3}$  |
| Benzene, (1-pentylheptyl)-                        | $4.56 \times 10^{-3}$ | $2.56 \times 10^{-2}$ | $3.66 \times 10^{-3}$  |
| Dimethyl Phthalate                                | $1.74 \times 10^{-2}$ | $2.56 \times 10^{-2}$ | $1.11 \times 10^{-3}$  |
| Octanal, 2-phenylmethylene-                       | $1.66 \times 10^{-2}$ | $2.56 \times 10^{-2}$ | $2.02 \times 10^{-3}$  |
| Heptadecane                                       | $3.31 \times 10^{-3}$ | $2.51 \times 10^{-2}$ | $4.90 \times 10^{-3}$  |
| Diethyl Phthalate                                 | $2.02 \times 10^{-2}$ | $2.42 \times 10^{-2}$ | $1.07 \times 10^{-3}$  |
| Pentadecane                                       | $3.25 \times 10^{-7}$ | $2.37 \times 10^{-2}$ | $6.97 \times 10^{-3}$  |
| Octadecane                                        | $4.54 \times 10^{-3}$ | $2.37 \times 10^{-2}$ | $5.89 \times 10^{-3}$  |
| TXIB                                              | $1.40 \times 10^{-2}$ | $2.36 \times 10^{-2}$ | $4.68 \times 10^{-4}$  |
| Pentadecane, 3-methyl-                            | $9.70 \times 10^{-8}$ | $2.28 \times 10^{-2}$ | $2.24 \times 10^{-3}$  |
| Tonalid                                           | $1.84 \times 10^{-2}$ | $2.21 \times 10^{-2}$ | $5.52 \times 10^{-3}$  |
| beta cedrene                                      | $1.31 \times 10^{-2}$ | $2.13 \times 10^{-2}$ | $3.00 \times 10^{-3}$  |
| Carvone                                           | $5.58 \times 10^{-3}$ | $2.13 \times 10^{-2}$ | $9.50 \times 10^{-4}$  |
| Cycloheptasiloxane, tetradecamethyl-              | $7.97 \times 10^{-3}$ | $2.09 \times 10^{-2}$ | $1.71 \times 10^{-2}$  |



| Compound                                         | Factor 1              | Factor 2               | Factor 3               |
|--------------------------------------------------|-----------------------|------------------------|------------------------|
| Nonadecane                                       | $9.10 \times 10^{-3}$ | $2.04 \times 10^{-2}$  | $1.17 \times 10^{-2}$  |
| 2-Decanone                                       | $1.05 \times 10^{-2}$ | $2.02 \times 10^{-2}$  | $1.53 \times 10^{-2}$  |
| Sandaracopimaradiene                             | $9.62 \times 10^{-3}$ | $1.95 \times 10^{-2}$  | $1.92 \times 10^{-2}$  |
| Dodecanoic acid, methyl ester                    | $8.90 \times 10^{-3}$ | $1.90 \times 10^{-2}$  | $3.79 \times 10^{-4}$  |
| Isobutanoic acid, phenoxyethanol ester           | $1.72 \times 10^{-2}$ | $1.90 \times 10^{-2}$  | $4.54 \times 10^{-9}$  |
| Dodecanal                                        | $1.17 \times 10^{-2}$ | $1.89 \times 10^{-2}$  | $5.60 \times 10^{-3}$  |
| Hexasiloxane, tetradecamethyl-                   | $3.34 \times 10^{-8}$ | $1.83 \times 10^{-2}$  | $1.02 \times 10^{-3}$  |
| Isophorone                                       | $7.25 \times 10^{-3}$ | $1.63 \times 10^{-2}$  | $2.79 \times 10^{-8}$  |
| Galaxolide                                       | $1.35 \times 10^{-2}$ | $1.60 \times 10^{-2}$  | $8.98 \times 10^{-4}$  |
| Limonene                                         | $4.25 \times 10^{-9}$ | $1.44 \times 10^{-2}$  | $4.52 \times 10^{-4}$  |
| Ethanol, 2-phenoxy-                              | $1.04 \times 10^{-2}$ | $1.37 \times 10^{-2}$  | $4.87 \times 10^{-10}$ |
| 1(2H)-Naphthalenone, 3,4-dihydro-                | $2.35 \times 10^{-2}$ | $6.44 \times 10^{-4}$  | $6.75 \times 10^{-2}$  |
| Fluoranthene                                     | $2.13 \times 10^{-2}$ | $9.78 \times 10^{-3}$  | $6.67 \times 10^{-2}$  |
| 1-Tetradecene                                    | $1.86 \times 10^{-2}$ | $1.93 \times 10^{-2}$  | $5.45 \times 10^{-2}$  |
| Pyrene                                           | $1.62 \times 10^{-2}$ | $8.39 \times 10^{-3}$  | $5.27 \times 10^{-2}$  |
| Coumarin                                         | $2.36 \times 10^{-2}$ | $1.05 \times 10^{-2}$  | $4.94 \times 10^{-2}$  |
| 9H-Fluoren-9-one                                 | $2.32 \times 10^{-2}$ | $1.89 \times 10^{-2}$  | $4.74 \times 10^{-2}$  |
| Heptylbenzene                                    | $1.27 \times 10^{-2}$ | $1.74 \times 10^{-2}$  | $4.67 \times 10^{-2}$  |
| Dibenzofuran                                     | $1.39 \times 10^{-2}$ | $1.88 \times 10^{-2}$  | $4.58 \times 10^{-2}$  |
| 1H-Indene, 2,3-dihydro-1,1,3-trimethyl-3-phenyl- | $1.23 \times 10^{-2}$ | $9.17 \times 10^{-3}$  | $3.97 \times 10^{-2}$  |
| Heneicosane                                      | $1.47 \times 10^{-2}$ | $8.95 \times 10^{-3}$  | $3.71 \times 10^{-2}$  |
| Phenanthrene                                     | $2.11 \times 10^{-2}$ | $2.20 \times 10^{-2}$  | $3.61 \times 10^{-2}$  |
| gamma-nonalactone                                | $1.91 \times 10^{-2}$ | $1.23 \times 10^{-2}$  | $3.53 \times 10^{-2}$  |
| Ethanone, 1-(4-methylphenyl)-                    | $1.67 \times 10^{-2}$ | $2.08 \times 10^{-2}$  | $3.23 \times 10^{-2}$  |
| Phthalic Acid                                    | $4.35 \times 10^{-3}$ | $1.42 \times 10^{-2}$  | $3.09 \times 10^{-2}$  |
| Benzene, 1,1'-cyclohexylidenebis-                | $1.93 \times 10^{-2}$ | $2.13 \times 10^{-2}$  | $2.90 \times 10^{-2}$  |
| Docosane                                         | $2.39 \times 10^{-2}$ | $8.58 \times 10^{-5}$  | $2.86 \times 10^{-2}$  |
| Biphenylene                                      | $8.84 \times 10^{-3}$ | $5.02 \times 10^{-3}$  | $2.58 \times 10^{-2}$  |
| Cyclooctasiloxane, hexadecamethyl-               | $8.40 \times 10^{-3}$ | $1.89 \times 10^{-2}$  | $2.58 \times 10^{-2}$  |
| Benzene, (1-methyltridecyl)-                     | $1.74 \times 10^{-2}$ | $1.78 \times 10^{-2}$  | $2.03 \times 10^{-2}$  |
| Chrysene                                         | $1.04 \times 10^{-2}$ | $1.92 \times 10^{-3}$  | $1.08 \times 10^{-2}$  |
| Eicosane                                         | $1.30 \times 10^{-3}$ | $1.51 \times 10^{-3}$  | $3.04 \times 10^{-3}$  |
| Levoglucosenone                                  | $9.04 \times 10^{-9}$ | $4.10 \times 10^{-10}$ | $1.42 \times 10^{-4}$  |

Table S5. Compound factor loadings for VOC adsorbent tube PMF results (fPeak=1).

| Compound                         | Factor 1              | Factor 2              |
|----------------------------------|-----------------------|-----------------------|
| Furfuryl Alcohol                 | $1.59 \times 10^{-7}$ | $5.51 \times 10^{-2}$ |
| Phenol                           | $1.19 \times 10^{-1}$ | $1.13 \times 10^{-6}$ |
| Menthol                          | $9.10 \times 10^{-3}$ | $6.31 \times 10^{-2}$ |
| Hexanal                          | $1.63 \times 10^{-2}$ | $5.36 \times 10^{-2}$ |
| Heptanal                         | $4.28 \times 10^{-2}$ | $4.15 \times 10^{-2}$ |
| Benzaldehyde                     | $9.25 \times 10^{-2}$ | $1.69 \times 10^{-2}$ |
| Octanal                          | $5.53 \times 10^{-2}$ | $3.36 \times 10^{-2}$ |
| Nonanal                          | $5.34 \times 10^{-2}$ | $1.46 \times 10^{-2}$ |
| Decanal                          | $9.48 \times 10^{-2}$ | $2.89 \times 10^{-7}$ |
| Methycyclohexane                 | $1.53 \times 10^{-2}$ | $1.88 \times 10^{-2}$ |
| Ethylcyclohexane                 | $2.84 \times 10^{-3}$ | $4.39 \times 10^{-2}$ |
| p-Xylene                         | $8.19 \times 10^{-2}$ | $9.12 \times 10^{-3}$ |
| o-Xylene                         | $6.51 \times 10^{-2}$ | $9.85 \times 10^{-3}$ |
| Styrene                          | $1.19 \times 10^{-2}$ | $5.60 \times 10^{-2}$ |
| Trimethylbenzene                 | $7.74 \times 10^{-2}$ | $4.31 \times 10^{-7}$ |
| Naphthalene                      | $2.58 \times 10^{-2}$ | $4.52 \times 10^{-2}$ |
| Tetrachloroethylene              | $7.11 \times 10^{-4}$ | $2.24 \times 10^{-2}$ |
| Acetophenone                     | $7.32 \times 10^{-2}$ | $3.20 \times 10^{-4}$ |
| a-Pinene                         | $8.24 \times 10^{-3}$ | $4.66 \times 10^{-2}$ |
| 3-Carene                         | $5.87 \times 10^{-7}$ | $5.55 \times 10^{-2}$ |
| a-Phellandrene                   | $9.94 \times 10^{-3}$ | $4.96 \times 10^{-2}$ |
| Limonene                         | $8.71 \times 10^{-3}$ | $5.97 \times 10^{-2}$ |
| g-Terpinene                      | $1.71 \times 10^{-6}$ | $4.84 \times 10^{-2}$ |
| Fenchol                          | $4.93 \times 10^{-7}$ | $5.73 \times 10^{-2}$ |
| Camphor                          | $6.49 \times 10^{-7}$ | $7.00 \times 10^{-2}$ |
| a-Terpineol                      | $2.11 \times 10^{-2}$ | $1.09 \times 10^{-2}$ |
| Cyclotrisiloxane, hexamethyl-    | $3.67 \times 10^{-2}$ | $6.74 \times 10^{-8}$ |
| Cyclotetrasiloxane, octamethyl-  | $4.24 \times 10^{-2}$ | $1.67 \times 10^{-2}$ |
| Cyclopentasiloxane, decamethyl-  | $3.22 \times 10^{-3}$ | $2.84 \times 10^{-2}$ |
| Cyclohexasiloxane, dodecamethyl- | $3.22 \times 10^{-2}$ | $4.01 \times 10^{-2}$ |
| Hexafluorobenzene                | $1.41 \times 10^{-8}$ | $3.28 \times 10^{-2}$ |

### Section S7: TAG and VOC Adsorbent Tube Integrated Time Series

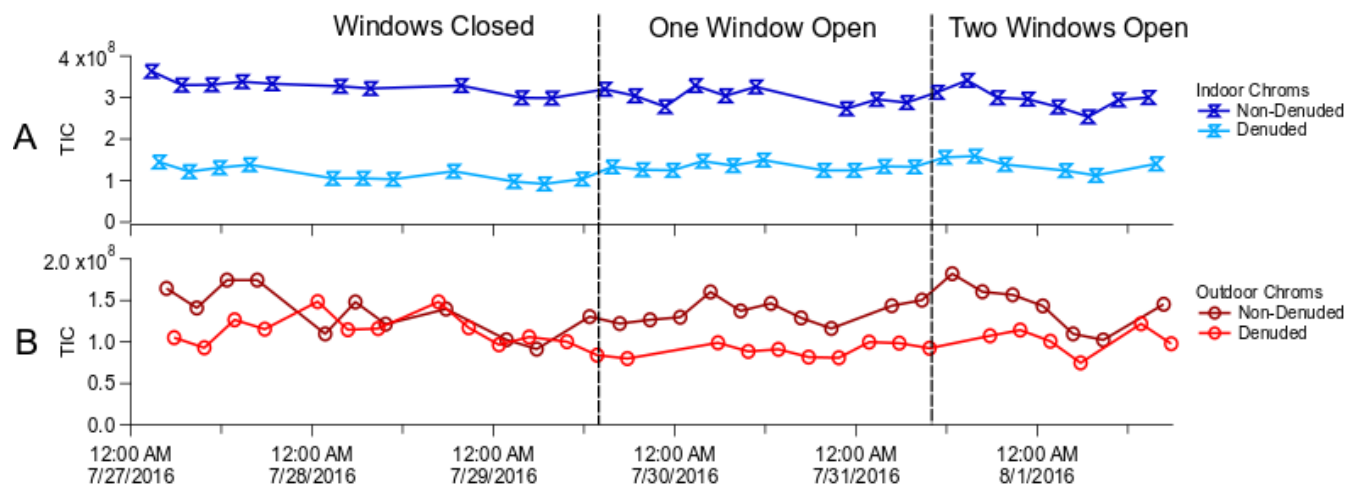

Figure S11. Total ion counts (TICs) summed across the compound period (20-40 minutes of chromatogram) for (A) indoor chromatograms and (B) outdoor chromatograms. Ions were summed from 29-450  $m/z$ .

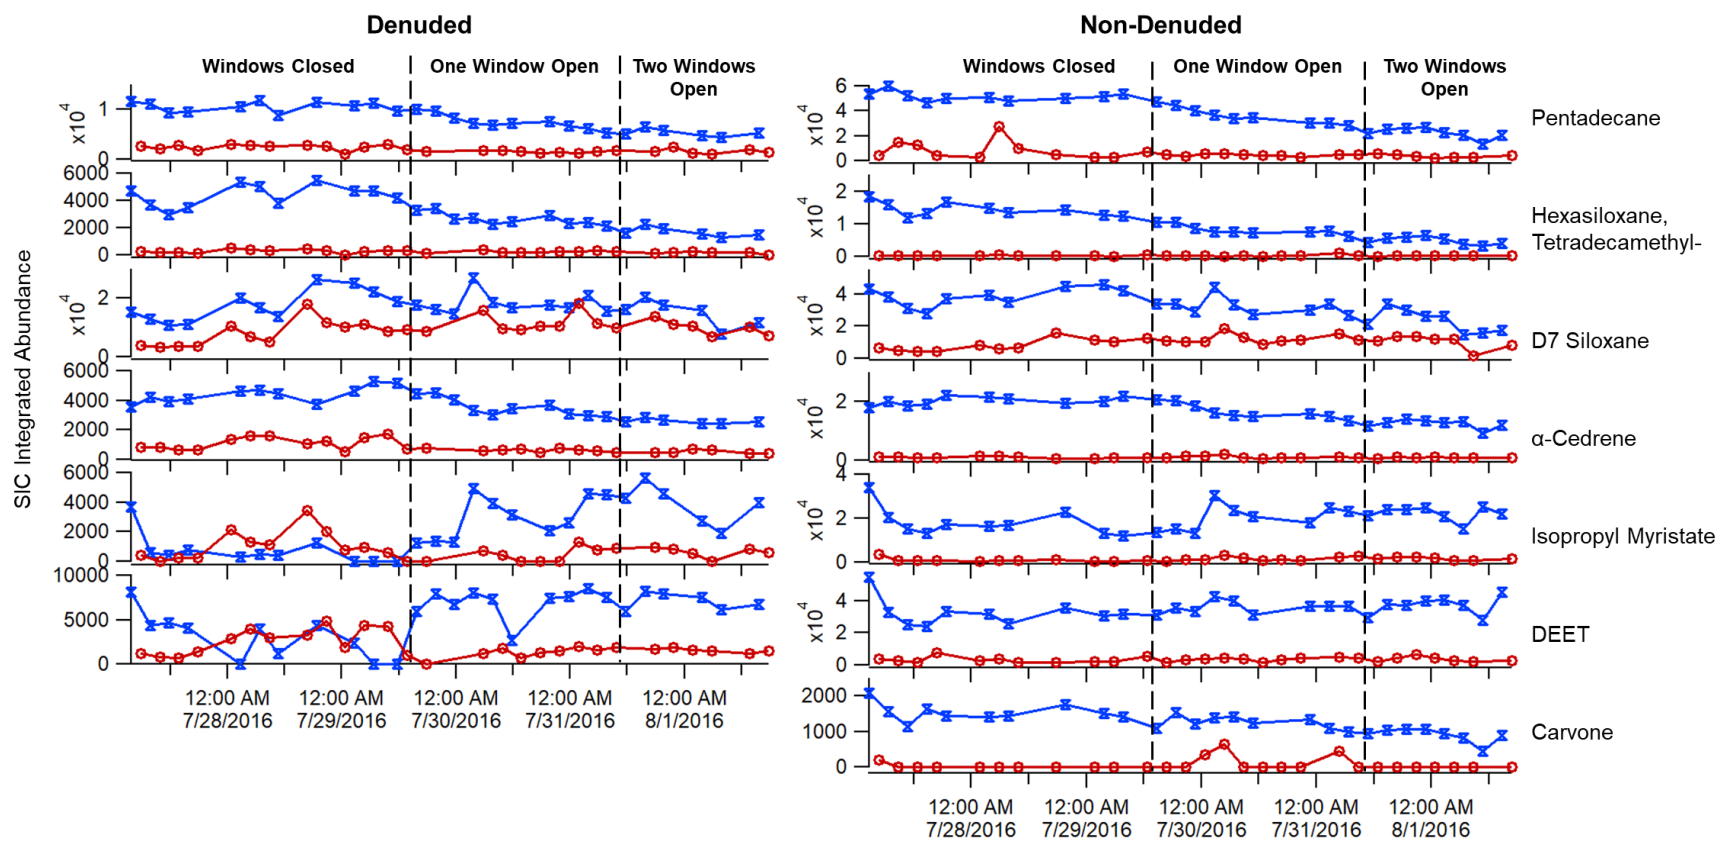

Figure S12. Raw single ion count (SIC) integrated time series for compounds displayed in Figure 7. Red circles denote outdoor abundances, and blue hourglasses denote indoor abundances.

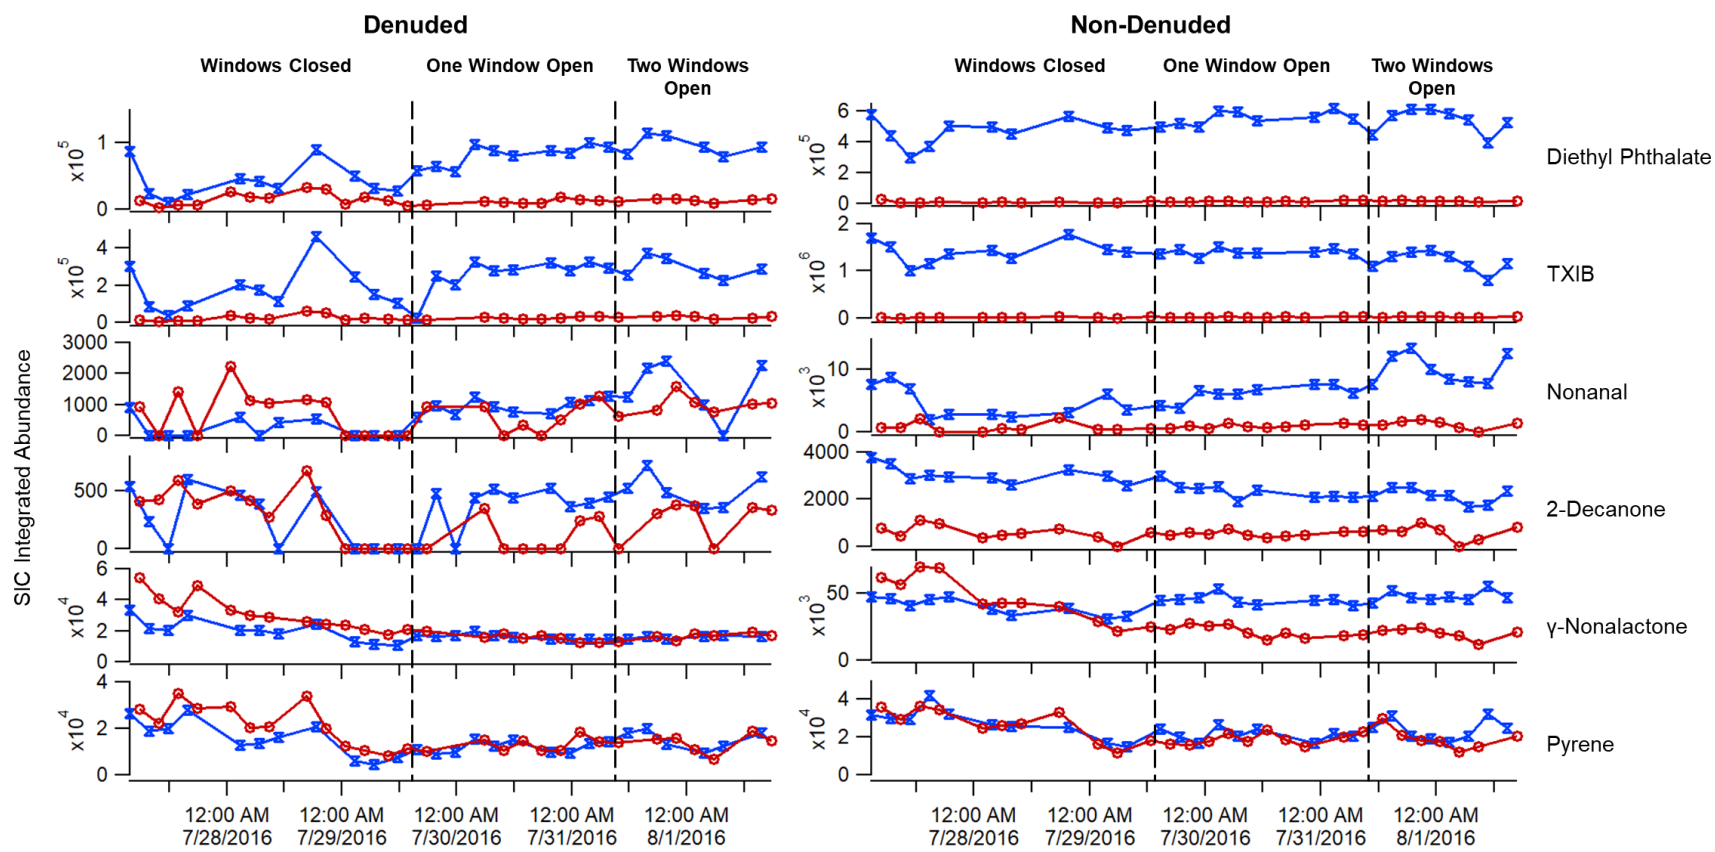

Figure S12, cont'd.

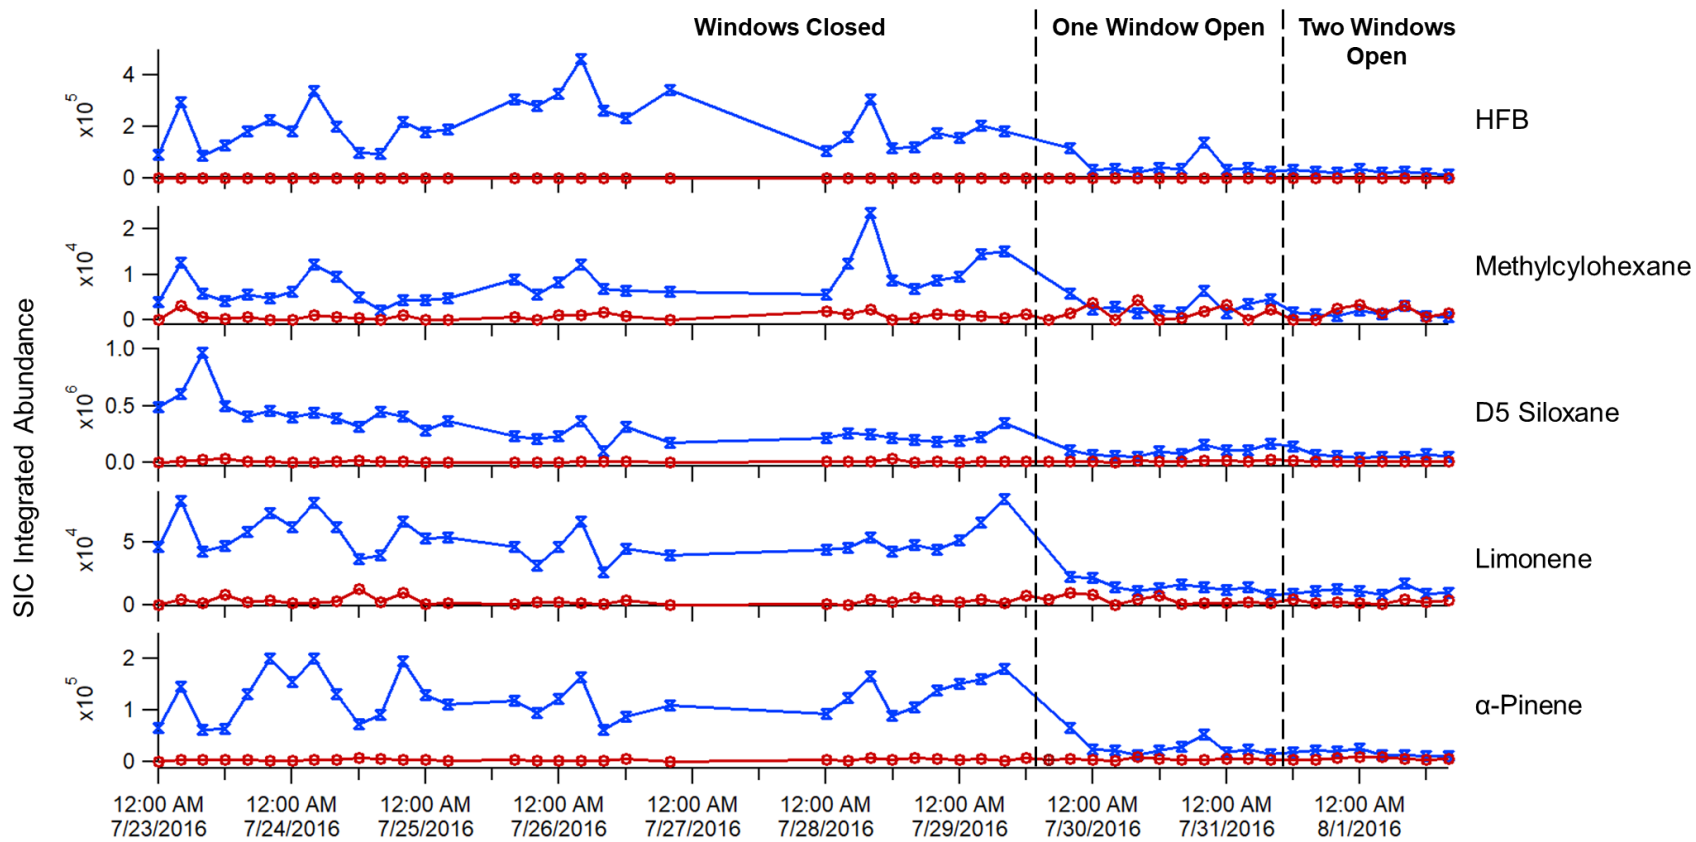

Figure S13. Raw SIC integrated time series for VOC adsorbent tube-measured compounds displayed in Figure 7. Red circles denote outdoor abundances, and blue hourglasses denote indoor abundances.

### Section S8: VOC Adsorbent Tube Mass Concentrations

In this section, we provide indoor concentrations for key VOCs over each of the three main natural ventilation conditions (WC, 1WO, 2WO). Quantified concentrations (ppb) were obtained, integrated, and calibrated for mass using total ion count (TIC) chromatographic peaks. Subsequent integrations, used in PMF and additional analysis presented in the main document, were performed on single ion chromatograms (SICs) using the TAG ExploRer and iNtegration package software (TERN, version 2.1.10), which allows for improved identification of retention time shift and therefore a more accurate representation of compound trends over time. We correlate TERN-integrated peak areas to previously quantified mass concentrations and provide a corresponding  $R^2$  to indicate the quality of the mass calibration (Table S6).

Table S6. Compounds quantified in indoor air VOC adsorbent tubes with average concentrations (ppb  $\pm$  1 standard deviation) across the three natural ventilation conditions (WC, 1WO, 2WO).  $R^2$  values for correlated TERN integrations and mass concentrations are also provided.

| Compound                                         | Average Conc.,<br>WC (ppb) | Average Conc.,<br>1WO (ppb) | Average Conc.,<br>2WO (ppb) | $R^2$           |
|--------------------------------------------------|----------------------------|-----------------------------|-----------------------------|-----------------|
| Hexafluorobenzene <sup>a</sup>                   | 27.6 $\pm$ 12              | 8.77 $\pm$ 6                | 5.20 $\pm$ 2                | 0.92            |
| Octafluorotoluene <sup>a</sup>                   | 7.38 $\pm$ 3               | 2.19 $\pm$ 2                | 1.25 $\pm$ 0.4              | 1               |
| Furfuryl alcohol                                 | 0.08 $\pm$ 0.03            | 0.04 $\pm$ 0.01             | 0.03 $\pm$ 0.01             | 0.81            |
| Phenol                                           | 2.95 $\pm$ 1               | 2.08 $\pm$ 0.9              | 2.81 $\pm$ 0.8              | 0.95            |
| Menthol                                          | 3.45 $\pm$ 1               | 1.69 $\pm$ 0.7              | 1.12 $\pm$ 0.4              | 0.91            |
| Formaldehyde                                     | 10.4 $\pm$ 2               | 13.3 $\pm$ 4                | 11.8 $\pm$ 1                | NA <sup>b</sup> |
| Acetaldehyde                                     | 11.7 $\pm$ 4               | 11.2 $\pm$ 5                | 14.5 $\pm$ 10               | NA <sup>b</sup> |
| Hexanal                                          | 13.9 $\pm$ 5               | 4.38 $\pm$ 1                | 5.31 $\pm$ 2                | 0.82            |
| Heptanal                                         | 4.90 $\pm$ 2               | 2.25 $\pm$ 0.8              | 3.93 $\pm$ 2                | 0.43            |
| Octanal                                          | 6.35 $\pm$ 2               | 2.92 $\pm$ 0.7              | 4.35 $\pm$ 1                | 0.68            |
| Nonanal                                          | 17.3 $\pm$ 5               | 12.2 $\pm$ 3                | 22.6 $\pm$ 11               | 0.41            |
| Decanal                                          | 3.52 $\pm$ 1               | 2.86 $\pm$ 0.8              | 5.12 $\pm$ 2                | 0.47            |
| Benzaldehyde                                     | 8.49 $\pm$ 3               | 4.26 $\pm$ 0.7              | 3.86 $\pm$ 0.9              | 0.73            |
| Methylcyclohexane                                | 3.16 $\pm$ 2               | 1.67 $\pm$ 1                | 0.561 $\pm$ 0.6             | 0.92            |
| Toluene                                          | 5.01 $\pm$ 2               | 2.21 $\pm$ 0.9              | 1.81 $\pm$ 0.3              | 0.99            |
| <i>p</i> -Xylene                                 | 2.49 $\pm$ 0.8             | 1.11 $\pm$ 0.3              | 0.902 $\pm$ 0.2             | 0.97            |
| <i>o</i> -Xylene                                 | 0.963 $\pm$ 0.4            | 0.332 $\pm$ 0.07            | 0.217 $\pm$ 0.1             | 0.89            |
| Styrene                                          | 0.960 $\pm$ 0.4            | 0.310 $\pm$ 0.09            | 0.292 $\pm$ 0.1             | 0.94            |
| Naphthalene                                      | 1.78 $\pm$ 0.5             | 0.992 $\pm$ 0.3             | 0.826 $\pm$ 0.1             | 0.94            |
| Tetrachloroethylene                              | 1.30 $\pm$ 0.8             | 0.591 $\pm$ 0.7             | 0.0509 $\pm$ 0.01           | 0.86            |
| Acetone                                          | 78.5 $\pm$ 20              | 32.4 $\pm$ 20               | 25.0 $\pm$ 20               | NA <sup>b</sup> |
| Acetophenone                                     | 1.39 $\pm$ 0.4             | 0.742 $\pm$ 0.4             | 0.626 $\pm$ 0.3             | 0.60            |
| $\alpha$ -Pinene                                 | 17.0 $\pm$ 6               | 3.72 $\pm$ 2                | 2.15 $\pm$ 0.7              | 1               |
| $\beta$ -Pinene                                  | 2.97 $\pm$ 1               | 0.608 $\pm$ 0.4             | 0.400 $\pm$ 0.1             | 0.98            |
| Limonene                                         | 7.37 $\pm$ 2               | 1.94 $\pm$ 0.6              | 1.26 $\pm$ 0.6              | 1               |
| $\alpha$ -terpineol                              | 8.64 $\pm$ 5               | 5.78 $\pm$ 2                | 7.07 $\pm$ 3                | 0.88            |
| Cyclotetrasiloxane, octamethyl-                  | 2.58 $\pm$ 1               | 0.866 $\pm$ 0.2             | 0.992 $\pm$ 0.5             | 0.96            |
| Cyclopentasiloxane,<br>decamethyl- (D5 Siloxane) | 16.0 $\pm$ 6               | 4.69 $\pm$ 2                | 3.16 $\pm$ 1                | 1               |
| Cyclohexasiloxane,<br>dodecamethyl-              | 2.30 $\pm$ 0.6             | 1.56 $\pm$ 0.4              | 1.40 $\pm$ 0.3              | 0.50            |

<sup>a</sup> Gas-phase tracers used to determine AER (Figure S3).

<sup>b</sup> Concentrations were quantified using HPLC and were therefore not re-integrated using TERN

**Section S9: Processed Integrated Abundances ( $I/I_{WC}$  and  $I/O$ )**

Table S7.  $I/I_{WC}$  and estimated particle-phase fractions for 70 selected TAG compounds. For each point, error is reported as  $\pm$  one standard deviation of normalized integrated abundances across the time period as a percent of the average value. Compounds marked with an asterisk designate those included in figures 7 and 8 within main text. Cells marked “ND” (no data) indicate that the value was not computed for reasons described in the table footnotes.

| Compound Name                                     | $I/I_{WC}$        |                   |                   |              |                 |                 | $f_p$           |                 |                 |
|---------------------------------------------------|-------------------|-------------------|-------------------|--------------|-----------------|-----------------|-----------------|-----------------|-----------------|
|                                                   | Denuded           |                   |                   | Non-Denuded  |                 |                 | WC              | 1WO             | 2WO             |
|                                                   | WC                | 1WO               | 2WO               | WC           | 1WO             | 2WO             |                 |                 |                 |
| 1,2-Benzisothiazole                               | ND <sup>a</sup>   | ND <sup>a</sup>   | ND <sup>a</sup>   | 1 $\pm$ 7%   | 0.95 $\pm$ 7%   | 0.92 $\pm$ 16%  | 0 $\pm$ 0%      | 0.02 $\pm$ 77%  | 0.03 $\pm$ 34%  |
| Benzyl Benzoate                                   | 1 $\pm$ 469%      | 7.66 $\pm$ 348%   | 17.88 $\pm$ 336%  | 1 $\pm$ 109% | 1.31 $\pm$ 88%  | 1.91 $\pm$ 82%  | 0.01 $\pm$ 340% | 0.05 $\pm$ 113% | 0.09 $\pm$ 60%  |
| Hexadecanoic acid, methyl ester                   | 1 $\pm$ 284%      | 3.94 $\pm$ 210%   | 7.02 $\pm$ 206%   | 1 $\pm$ 64%  | 1.11 $\pm$ 61%  | 1.52 $\pm$ 55%  | 0.05 $\pm$ 206% | 0.17 $\pm$ 74%  | 0.22 $\pm$ 56%  |
| Isopropyl Myristate*                              | 1 $\pm$ 209%      | 4.18 $\pm$ 156%   | 5.41 $\pm$ 152%   | 1 $\pm$ 50%  | 1.12 $\pm$ 45%  | 1.22 $\pm$ 38%  | 0.04 $\pm$ 152% | 0.15 $\pm$ 56%  | 0.17 $\pm$ 38%  |
| Nonanal*                                          | 1 $\pm$ 209%      | 4.19 $\pm$ 150%   | 6.80 $\pm$ 160%   | 1 $\pm$ 77%  | 1.34 $\pm$ 59%  | 2.19 $\pm$ 59%  | 0.05 $\pm$ 157% | 0.15 $\pm$ 34%  | 0.15 $\pm$ 67%  |
| Phthalic Acid, diisobutyl ester                   | 1 $\pm$ 243%      | 7.24 $\pm$ 178%   | 10.89 $\pm$ 173%  | 1 $\pm$ 36%  | 1.41 $\pm$ 37%  | 1.86 $\pm$ 30%  | 0.05 $\pm$ 173% | 0.24 $\pm$ 53%  | 0.28 $\pm$ 26%  |
| Dimethyl Anthracene                               | 1 $\pm$ 150%      | 3.11 $\pm$ 108%   | 2.93 $\pm$ 110%   | 1 $\pm$ 23%  | 1.12 $\pm$ 27%  | 1.29 $\pm$ 24%  | 0.14 $\pm$ 107% | 0.38 $\pm$ 28%  | 0.32 $\pm$ 35%  |
| Dibutyl Phthalate                                 | 1 $\pm$ 256%      | 7.64 $\pm$ 190%   | 14.52 $\pm$ 186%  | 1 $\pm$ 42%  | 1.50 $\pm$ 49%  | 2.23 $\pm$ 44%  | 0.06 $\pm$ 184% | 0.30 $\pm$ 68%  | 0.38 $\pm$ 53%  |
| Tricosane                                         | 1 $\pm$ 209%      | 0.72 $\pm$ 189%   | 1.59 $\pm$ 157%   | 1 $\pm$ 102% | 0.62 $\pm$ 79%  | 1.00 $\pm$ 85%  | 0.20 $\pm$ 165% | 0.23 $\pm$ 122% | 0.32 $\pm$ 68%  |
| Hedione                                           | ND <sup>a</sup>   | ND <sup>a</sup>   | ND <sup>a</sup>   | 1 $\pm$ 447% | 2.63 $\pm$ 327% | 4.21 $\pm$ 319% | 0 $\pm$ 0%      | 0.03 $\pm$ 227% | 0.10 $\pm$ 75%  |
| DEET*                                             | 1 $\pm$ 120%      | 2.31 $\pm$ 88%    | 2.35 $\pm$ 86%    | 1 $\pm$ 38%  | 1.11 $\pm$ 29%  | 1.13 $\pm$ 31%  | 0.09 $\pm$ 89%  | 0.19 $\pm$ 26%  | 0.19 $\pm$ 20%  |
| 9,10-Anthracenedione                              | 1 $\pm$ 344%      | 1.23 $\pm$ 294%   | 2.81 $\pm$ 258%   | 1 $\pm$ 136% | 1.33 $\pm$ 151% | 2.15 $\pm$ 116% | 0.39 $\pm$ 262% | 0.36 $\pm$ 202% | 0.52 $\pm$ 108% |
| Isopropyl Palmitate                               | 1 $\pm$ 330%      | 5.10 $\pm$ 251%   | 15.53 $\pm$ 244%  | 1 $\pm$ 111% | 1.22 $\pm$ 91%  | 2.06 $\pm$ 97%  | 0.03 $\pm$ 246% | 0.15 $\pm$ 105% | 0.26 $\pm$ 93%  |
| 2,2,4-Trimethyl-3,3-pentenediol monoisobutyrate   | ND <sup>a,b</sup> | ND <sup>a,b</sup> | ND <sup>a,b</sup> | 1 $\pm$ 360% | 1.85 $\pm$ 268% | 3.60 $\pm$ 259% | 0 $\pm$ 0%      | 0 $\pm$ 0%      | 0 $\pm$ 0%      |
| Octanoic Acid                                     | 1 $\pm$ 329%      | 7.85 $\pm$ 237%   | 13.96 $\pm$ 235%  | 1 $\pm$ 83%  | 3.07 $\pm$ 67%  | 4.88 $\pm$ 63%  | 0.04 $\pm$ 240% | 0.10 $\pm$ 55%  | 0.12 $\pm$ 35%  |
| Tetracosane                                       | 1 $\pm$ 271%      | 0.27 $\pm$ 299%   | 1.72 $\pm$ 220%   | 1 $\pm$ 150% | 0.39 $\pm$ 152% | 1.16 $\pm$ 123% | 0.12 $\pm$ 219% | 0.08 $\pm$ 254% | 0.18 $\pm$ 126% |
| 5,9-Undecadien-2-one, 6,10-dimethyl-              | ND <sup>a</sup>   | ND <sup>a</sup>   | ND <sup>a</sup>   | 1 $\pm$ 49%  | 1.09 $\pm$ 42%  | 1.14 $\pm$ 59%  | 0 $\pm$ 0%      | 0.05 $\pm$ 113% | 0.15 $\pm$ 68%  |
| Benzo[c]phenanthrene                              | 1 $\pm$ 207%      | 0.03 $\pm$ 348%   | 0.17 $\pm$ 285%   | 1 $\pm$ 138% | 0.29 $\pm$ 137% | 0.52 $\pm$ 108% | 0.51 $\pm$ 176% | 0.06 $\pm$ 331% | 0.16 $\pm$ 249% |
| 2-Propanol, 1-[1-methyl-2-(2-propenyloxy)ethoxy]- | ND <sup>a,b</sup> | ND <sup>a,b</sup> | ND <sup>a,b</sup> | 1 $\pm$ 209% | 1.14 $\pm$ 152% | 1.17 $\pm$ 156% | 0 $\pm$ 0%      | 0 $\pm$ 0%      | 0 $\pm$ 0%      |



| Compound Name                         | $I/I_{wc}$        |                   |                   |             |             |             | $f_p$       |            |             |
|---------------------------------------|-------------------|-------------------|-------------------|-------------|-------------|-------------|-------------|------------|-------------|
|                                       | Denuded           |                   |                   | Non-Denuded |             |             |             |            |             |
|                                       | WC                | 1WO               | 2WO               | WC          | 1WO         | 2WO         | WC          | 1WO        | 2WO         |
| Bis-(2-ethylhexyl)-phthalate          | ND <sup>a</sup>   | ND <sup>a</sup>   | ND <sup>a</sup>   | 1 ± 447%    | 1.64 ± 337% | 7.93 ± 326% | 0 ± 0%      | 0 ± 0%     | 0.18 ± 154% |
| Pentacosane                           | 1 ± 317%          | 0 ± 0%            | 2.01 ± 280%       | 1 ± 179%    | 0.21 ± 216% | 0.93 ± 163% | 0.08 ± 257% | 0 ± 0%     | 0.17 ± 197% |
| Benzophenone                          | 1 ± 25%           | 1.38 ± 19%        | 1.51 ± 21%        | 1 ± 100%    | 1.97 ± 73%  | 2.06 ± 76%  | 1.44 ± 73%  | 1.01 ± 20% | 1.05 ± 29%  |
| Benzoic acid, 2-ethylhexyl ester      | 1 ± 40%           | 1.36 ± 29%        | 1.34 ± 31%        | 1 ± 14%     | 0.97 ± 10%  | 0.85 ± 17%  | 0.15 ± 30%  | 0.21 ± 9%  | 0.24 ± 20%  |
| alpha cedrene*                        | 1 ± 18%           | 0.81 ± 21%        | 0.59 ± 14%        | 1 ± 10%     | 0.83 ± 17%  | 0.62 ± 14%  | 0.22 ± 14%  | 0.21 ± 23% | 0.21 ± 13%  |
| Benzene, (1-butylloctyl)-             | 1 ± 8%            | 0.81 ± 15%        | 0.65 ± 9%         | 1 ± 12%     | 0.78 ± 14%  | 0.57 ± 15%  | 0.26 ± 10%  | 0.27 ± 18% | 0.30 ± 14%  |
| Phytane                               | 1 ± 39%           | 1.19 ± 28%        | 0.86 ± 29%        | 1 ± 15%     | 0.80 ± 14%  | 0.62 ± 14%  | 0.26 ± 29%  | 0.38 ± 12% | 0.36 ± 12%  |
| Benzene, (1-pentylheptyl)-            | 1 ± 14%           | 0.81 ± 15%        | 0.64 ± 10%        | 1 ± 14%     | 0.77 ± 15%  | 0.56 ± 17%  | 0.24 ± 14%  | 0.25 ± 16% | 0.28 ± 15%  |
| Dimethyl Phthalate                    | 1 ± 55%           | 1.58 ± 41%        | 1.88 ± 41%        | 1 ± 19%     | 1.13 ± 16%  | 1.12 ± 23%  | 0.11 ± 41%  | 0.15 ± 16% | 0.18 ± 24%  |
| Octanal, 2-phenylmethylene-           | 1 ± 61%           | 2.00 ± 49%        | 2.06 ± 47%        | 1 ± 17%     | 1.00 ± 17%  | 0.91 ± 16%  | 0.07 ± 45%  | 0.14 ± 26% | 0.16 ± 23%  |
| Heptadecane                           | 1 ± 18%           | 0.93 ± 16%        | 0.73 ± 16%        | 1 ± 11%     | 0.76 ± 14%  | 0.53 ± 14%  | 0.21 ± 15%  | 0.25 ± 16% | 0.29 ± 15%  |
| Diethyl Phthalate*                    | 1 ± 86%           | 1.94 ± 64%        | 2.28 ± 63%        | 1 ± 26%     | 1.18 ± 20%  | 1.15 ± 23%  | 0.09 ± 63%  | 0.15 ± 21% | 0.18 ± 21%  |
| Pentadecane*                          | 1 ± 14%           | 0.71 ± 22%        | 0.50 ± 18%        | 1 ± 10%     | 0.70 ± 20%  | 0.43 ± 21%  | 0.20 ± 12%  | 0.21 ± 27% | 0.24 ± 25%  |
| Octadecane                            | 1 ± 54%           | 1.24 ± 39%        | 0.96 ± 39%        | 1 ± 14%     | 0.74 ± 14%  | 0.57 ± 13%  | 0.16 ± 40%  | 0.27 ± 12% | 0.27 ± 13%  |
| TXIB*                                 | 1 ± 96%           | 1.44 ± 77%        | 1.63 ± 71%        | 1 ± 23%     | 0.99 ± 17%  | 0.85 ± 23%  | 0.13 ± 70%  | 0.18 ± 36% | 0.24 ± 26%  |
| Pentadecane, 3-methyl-                | 1 ± 22%           | 0.58 ± 27%        | 0.43 ± 29%        | 1 ± 12%     | 0.65 ± 25%  | 0.41 ± 27%  | 0.21 ± 18%  | 0.18 ± 32% | 0.22 ± 36%  |
| Tonalid                               | 1 ± 83%           | 2.45 ± 61%        | 2.55 ± 65%        | 1 ± 21%     | 0.98 ± 18%  | 0.93 ± 16%  | 0.12 ± 60%  | 0.29 ± 19% | 0.32 ± 28%  |
| beta cedrene                          | 1 ± 25%           | 1.09 ± 18%        | 1.02 ± 20%        | 1 ± 29%     | 0.91 ± 25%  | 0.77 ± 27%  | 0.16 ± 27%  | 0.19 ± 16% | 0.20 ± 20%  |
| Carvone*                              | ND <sup>a,b</sup> | ND <sup>a,b</sup> | ND <sup>a,b</sup> | 1 ± 23%     | 0.82 ± 22%  | 0.59 ± 28%  | 0 ± 0%      | 0 ± 0%     | 0 ± 0%      |
| Cycloheptasiloxane, tetradecamethyl-* | 1 ± 44%           | 1.04 ± 37%        | 0.85 ± 43%        | 1 ± 22%     | 0.84 ± 22%  | 0.61 ± 34%  | 0.46 ± 35%  | 0.56 ± 25% | 0.65 ± 43%  |
| Nonadecane                            | 1 ± 75%           | 1.54 ± 55%        | 1.34 ± 55%        | 1 ± 21%     | 0.78 ± 18%  | 0.71 ± 18%  | 0.18 ± 55%  | 0.35 ± 18% | 0.33 ± 18%  |
| 2-Decanone*                           | 1 ± 145%          | 1.45 ± 116%       | 2.05 ± 106%       | 1 ± 17%     | 0.77 ± 19%  | 0.71 ± 19%  | 0.08 ± 103% | 0.15 ± 56% | 0.23 ± 32%  |
| Sandaracopimaradiene                  | 1 ± 66%           | 2.10 ± 53%        | 1.94 ± 51%        | 1 ± 14%     | 0.85 ± 24%  | 0.76 ± 24%  | 0.20 ± 47%  | 0.50 ± 33% | 0.52 ± 29%  |

| Compound Name                                        | $I/I_{wc}$        |                   |                   |             |            |            | $f_p$       |             |            |
|------------------------------------------------------|-------------------|-------------------|-------------------|-------------|------------|------------|-------------|-------------|------------|
|                                                      | Denuded           |                   |                   | Non-Denuded |            |            |             |             |            |
|                                                      | WC                | 1WO               | 2WO               | WC          | 1WO        | 2WO        | WC          | 1WO         | 2WO        |
| Dodecanoic acid, methyl ester                        | 1 ± 75%           | 0.91 ± 55%        | 1.05 ± 59%        | 1 ± 27%     | 0.82 ± 22% | 0.70 ± 34% | 0.11 ± 56%  | 0.12 ± 18%  | 0.16 ± 39% |
| Isobutanoic acid, phenoxyethanol ester               | 1 ± 108%          | 1.61 ± 80%        | 2.10 ± 81%        | 1 ± 54%     | 1.06 ± 40% | 1.01 ± 45% | 0.08 ± 85%  | 0.13 ± 28%  | 0.17 ± 37% |
| Dodecanal                                            | 1 ± 259%          | 2.93 ± 185%       | 3.56 ± 184%       | 1 ± 30%     | 0.80 ± 23% | 0.74 ± 24% | 0.03 ± 184% | 0.12 ± 30%  | 0.16 ± 22% |
| Hexasiloxane, tetradecamethyl-*                      | 1 ± 26%           | 0.61 ± 25%        | 0.39 ± 28%        | 1 ± 20%     | 0.56 ± 23% | 0.34 ± 28% | 0.30 ± 24%  | 0.33 ± 25%  | 0.35 ± 32% |
| Isophorone                                           | ND <sup>a,b</sup> | ND <sup>a,b</sup> | ND <sup>a,b</sup> | 1 ± 52%     | 0.91 ± 39% | 0.60 ± 61% | 0 ± 0%      | 0 ± 0%      | 0 ± 0%     |
| Galaxolide                                           | 1 ± 117%          | 2.54 ± 88%        | 2.55 ± 87%        | 1 ± 37%     | 0.86 ± 33% | 0.80 ± 31% | 0.06 ± 87%  | 0.19 ± 35%  | 0.21 ± 30% |
| Limonene                                             | 1 ± 59%           | 0.46 ± 48%        | 0.40 ± 63%        | 1 ± 19%     | 0.49 ± 34% | 0.21 ± 54% | 0.19 ± 44%  | 0.18 ± 40%  | 0.36 ± 71% |
| Ethanol, 2-phenoxy-1(2H)-Naphthalenone, 3,4-dihydro- | ND <sup>a,b</sup> | ND <sup>a,b</sup> | ND <sup>a,b</sup> | 1 ± 45%     | 1.29 ± 37% | 1.62 ± 43% | 0 ± 0%      | 0 ± 0%      | 0 ± 0%     |
| Fluoranthene                                         | 1 ± 29%           | 0.73 ± 22%        | 0.83 ± 26%        | 1 ± 27%     | 0.90 ± 24% | 1.03 ± 30% | 0.66 ± 28%  | 0.54 ± 17%  | 0.53 ± 29% |
| 1-Tetradecene                                        | 1 ± 33%           | 1.15 ± 26%        | 1.37 ± 34%        | 1 ± 6%      | 0.89 ± 8%  | 0.87 ± 15% | 0.30 ± 24%  | 0.38 ± 14%  | 0.46 ± 29% |
| Pyrene*                                              | 1 ± 70%           | 0.76 ± 54%        | 0.96 ± 57%        | 1 ± 40%     | 0.78 ± 32% | 0.87 ± 37% | 0.58 ± 57%  | 0.56 ± 26%  | 0.64 ± 36% |
| Coumarin                                             | 1 ± 469%          | 5.86 ± 348%       | 11.83 ± 335%      | 1 ± 19%     | 1.04 ± 15% | 1.26 ± 21% | 0.02 ± 332% | 0.13 ± 106% | 0.22 ± 53% |
| 9H-Fluoren-9-one                                     | 1 ± 25%           | 1.01 ± 20%        | 1.06 ± 26%        | 1 ± 9%      | 0.98 ± 10% | 1.00 ± 12% | 0.33 ± 19%  | 0.34 ± 12%  | 0.35 ± 22% |
| Heptylbenzene                                        | 1 ± 38%           | 1.10 ± 29%        | 1.10 ± 31%        | 1 ± 22%     | 0.84 ± 23% | 0.78 ± 21% | 0.36 ± 31%  | 0.47 ± 21%  | 0.51 ± 21% |
| Dibenzofuran                                         | 1 ± 19%           | 0.93 ± 17%        | 0.89 ± 21%        | 1 ± 6%      | 0.89 ± 8%  | 0.80 ± 16% | 0.29 ± 14%  | 0.31 ± 12%  | 0.33 ± 22% |
| 1H-Indene, 2,3-dihydro-1,1,3-trimethyl-3-phenyl-     | 1 ± 141%          | 0.55 ± 123%       | 0.93 ± 100%       | 1 ± 52%     | 0.68 ± 41% | 0.87 ± 44% | 0.30 ± 106% | 0.24 ± 74%  | 0.32 ± 27% |
| Heneicosane                                          | 1 ± 87%           | 1.33 ± 67%        | 1.88 ± 76%        | 1 ± 48%     | 0.92 ± 43% | 1.03 ± 52% | 0.25 ± 71%  | 0.36 ± 37%  | 0.45 ± 60% |
| Phenanthrene                                         | 1 ± 25%           | 1.12 ± 20%        | 1.12 ± 19%        | 1 ± 11%     | 1.04 ± 10% | 0.99 ± 12% | 0.22 ± 20%  | 0.23 ± 10%  | 0.25 ± 12% |
| gamma-nonalactone*                                   | 1 ± 50%           | 0.80 ± 37%        | 0.79 ± 36%        | 1 ± 22%     | 1.13 ± 17% | 1.19 ± 18% | 0.51 ± 39%  | 0.36 ± 13%  | 0.33 ± 10% |
| Ethanone, 1-(4-methylphenyl)-                        | 1 ± 31%           | 1.29 ± 34%        | 1.45 ± 26%        | 1 ± 15%     | 0.90 ± 15% | 0.83 ± 13% | 0.20 ± 25%  | 0.29 ± 28%  | 0.35 ± 16% |
| Phthalic Acid                                        | 1 ± 25%           | 1.14 ± 22%        | 1.08 ± 25%        | 1 ± 41%     | 0.63 ± 39% | 0.61 ± 37% | 0.27 ± 34%  | 0.50 ± 29%  | 0.49 ± 29% |
| Benzene, 1,1'-cyclohexylidenebis-                    | 1 ± 72%           | 1.51 ± 53%        | 1.61 ± 51%        | 1 ± 12%     | 0.92 ± 12% | 1.01 ± 11% | 0.36 ± 51%  | 0.60 ± 17%  | 0.58 ± 10% |

| Compound Name                         | $I/I_{WC}$ |             |              |                   |                   |                   | $f_p$           |             |             |
|---------------------------------------|------------|-------------|--------------|-------------------|-------------------|-------------------|-----------------|-------------|-------------|
|                                       | Denuded    |             |              | Non-Denuded       |                   |                   |                 |             |             |
|                                       | WC         | 1WO         | 2WO          | WC                | 1WO               | 2WO               | WC              | 1WO         | 2WO         |
| Docosane                              | 1 ± 125%   | 1.39 ± 91%  | 2.07 ± 97%   | 1 ± 78%           | 1.00 ± 58%        | 1.31 ± 67%        | 0.24 ± 104%     | 0.33 ± 29%  | 0.37 ± 55%  |
| Biphenylene                           | 1 ± 20%    | 0.93 ± 22%  | 0.95 ± 26%   | 1 ± 22%           | 1.18 ± 66%        | 1.11 ± 58%        | 0.87 ± 21%      | 0.69 ± 66%  | 0.75 ± 59%  |
| Cyclooctasiloxane,<br>hexadecamethyl- | 1 ± 29%    | 1.15 ± 26%  | 0.95 ± 29%   | 1 ± 28%           | 0.82 ± 24%        | 0.64 ± 27%        | 0.23 ± 29%      | 0.33 ± 21%  | 0.35 ± 27%  |
| Benzene, (1-<br>methyltridecyl)-      | 1 ± 75%    | 1.98 ± 59%  | 2.21 ± 58%   | 1 ± 22%           | 0.94 ± 26%        | 1.04 ± 23%        | 0.21 ± 56%      | 0.44 ± 32%  | 0.44 ± 29%  |
| Chrysene                              | 1 ± 99%    | 0.35 ± 123% | 0.69 ± 87%   | 1 ± 101%          | 0.47 ± 78%        | 0.57 ± 83%        | 0.40 ± 100%     | 0.30 ± 106% | 0.49 ± 67%  |
| Eicosane                              | 1 ± 68%    | 1.55 ± 59%  | 1.76 ± 63%   | 1 ± 31%           | 0.89 ± 39%        | 2.38 ± 189%       | 0.22 ± 53%      | 0.38 ± 46%  | 0.16 ± 192% |
| Levoglucosenone                       | 1 ± 469%   | 7.82 ± 336% | 10.14 ± 334% | ND <sup>a,b</sup> | ND <sup>a,b</sup> | ND <sup>a,b</sup> | ND <sup>c</sup> | 1.20 ± 141% | 1.56 ± 151% |

<sup>a</sup>  $I/I_{WC}$  was not calculated for this condition because  $I_{WC} = 0$ .

<sup>b</sup>  $I/I_{WC}$  was not calculated for this condition because  $I_{WC} = 0$  and  $I = 0$ .

<sup>c</sup>  $f_p$  was not calculated for this condition because  $I_{ND} = 0$ .

Table S8. Indoor-to-outdoor ratios (*I/O*) and TAG-sulfate normalized indoor-to-outdoor ratios ( $[I/O]_{i/m/z\ 64}$ ) for 70 selected TAG compounds. For each point, error is reported as  $\pm$  one standard deviation as a percent of the average value. Compounds marked with an asterisk designate those included in figures 8 and 9 within main text. Cells marked “ND” (no data) indicate that the value was not computed for reasons described in the table footnotes.

| Compound Name                                   | <i>I/O</i>        |                   |                   |                   |                  |                  | $[I/O]_{i/m/z\ 64}$ |                   |                   |                   |                  |                   |
|-------------------------------------------------|-------------------|-------------------|-------------------|-------------------|------------------|------------------|---------------------|-------------------|-------------------|-------------------|------------------|-------------------|
|                                                 | Denuded           |                   |                   | Non-Denuded       |                  |                  | Denuded             |                   |                   | Non-Denuded       |                  |                   |
|                                                 | WC                | 1WO               | 2WO               | WC                | 1WO              | 2WO              | WC                  | 1WO               | 2WO               | WC                | 1WO              | 2WO               |
| 1,2-Benzisothiazole                             | 0 $\pm$ 0         | 20.35 $\pm$ 310%  | 7.64 $\pm$ 207%   | 207.91 $\pm$ 138% | 59.59 $\pm$ 64%  | 99.85 $\pm$ 127% | 0 $\pm$ 0           | 34.05 $\pm$ 315%  | 10.97 $\pm$ 225%  | 990.71 $\pm$ 152% | 99.73 $\pm$ 87%  | 143.38 $\pm$ 153% |
| Benzyl Benzoate                                 | 0.54 $\pm$ 411%   | ND <sup>a</sup>   | 45.07 $\pm$ 270%  | 42.40 $\pm$ 176%  | 40.25 $\pm$ 146% | 23.09 $\pm$ 74%  | 2.59 $\pm$ 415%     | ND <sup>a</sup>   | 64.72 $\pm$ 283%  | 202.02 $\pm$ 187% | 67.36 $\pm$ 157% | 33.16 $\pm$ 114%  |
| Hexadecanoic acid, methyl ester                 | 0.30 $\pm$ 218%   | 2.41 $\pm$ 120%   | 2.63 $\pm$ 60%    | 5.54 $\pm$ 102%   | 4.89 $\pm$ 79%   | 5.94 $\pm$ 55%   | 1.42 $\pm$ 227%     | 4.04 $\pm$ 134%   | 3.77 $\pm$ 105%   | 26.38 $\pm$ 120%  | 8.18 $\pm$ 99%   | 8.53 $\pm$ 102%   |
| Isopropyl Myristate*                            | 0.65 $\pm$ 174%   | 8.34 $\pm$ 142%   | 5.88 $\pm$ 61%    | 18.41 $\pm$ 98%   | 12.74 $\pm$ 65%  | 13.95 $\pm$ 45%  | 3.08 $\pm$ 185%     | 13.95 $\pm$ 154%  | 8.45 $\pm$ 106%   | 87.71 $\pm$ 116%  | 21.32 $\pm$ 88%  | 20.02 $\pm$ 98%   |
| Nonanal*                                        | 0.30 $\pm$ 178%   | 1.67 $\pm$ 93%    | 1.53 $\pm$ 70%    | 6.18 $\pm$ 114%   | 6.37 $\pm$ 39%   | 8.35 $\pm$ 61%   | 1.42 $\pm$ 188%     | 2.80 $\pm$ 110%   | 2.20 $\pm$ 111%   | 29.44 $\pm$ 130%  | 10.66 $\pm$ 71%  | 11.99 $\pm$ 106%  |
| Phthalic Acid, diisobutyl ester                 | 0.32 $\pm$ 187%   | 2.08 $\pm$ 75%    | 2.41 $\pm$ 27%    | 5.01 $\pm$ 88%    | 2.53 $\pm$ 54%   | 2.83 $\pm$ 23%   | 1.53 $\pm$ 197%     | 3.49 $\pm$ 96%    | 3.47 $\pm$ 91%    | 23.86 $\pm$ 108%  | 4.24 $\pm$ 80%   | 4.06 $\pm$ 89%    |
| Dimethyl Anthracene                             | 0.42 $\pm$ 114%   | 2.00 $\pm$ 40%    | 1.91 $\pm$ 59%    | 3.66 $\pm$ 45%    | 3.06 $\pm$ 32%   | 4.07 $\pm$ 34%   | 1.99 $\pm$ 130%     | 3.35 $\pm$ 71%    | 2.74 $\pm$ 105%   | 17.45 $\pm$ 78%   | 5.12 $\pm$ 68%   | 5.84 $\pm$ 93%    |
| Dibutyl Phthalate                               | 0.22 $\pm$ 199%   | 1.14 $\pm$ 75%    | 1.32 $\pm$ 49%    | 2.34 $\pm$ 68%    | 1.52 $\pm$ 59%   | 1.45 $\pm$ 40%   | 1.03 $\pm$ 209%     | 1.91 $\pm$ 96%    | 1.90 $\pm$ 99%    | 11.14 $\pm$ 93%   | 2.54 $\pm$ 84%   | 2.08 $\pm$ 95%    |
| Tricosane                                       | 0.30 $\pm$ 171%   | 1.39 $\pm$ 179%   | 1.08 $\pm$ 78%    | 1.25 $\pm$ 112%   | 2.25 $\pm$ 76%   | 1.66 $\pm$ 69%   | 1.41 $\pm$ 183%     | 2.33 $\pm$ 189%   | 1.55 $\pm$ 116%   | 5.94 $\pm$ 128%   | 3.77 $\pm$ 96%   | 2.39 $\pm$ 111%   |
| Hedione                                         | ND <sup>a,b</sup> | ND <sup>a</sup>   | ND <sup>a</sup>   | ND <sup>a</sup>   | ND <sup>a</sup>  | ND <sup>a</sup>  | ND <sup>a,b</sup>   | ND <sup>a</sup>   | ND <sup>a</sup>   | ND <sup>a</sup>   | ND <sup>a</sup>  | ND <sup>a</sup>   |
| DEET*                                           | 1.12 $\pm$ 101%   | 5.71 $\pm$ 55%    | 4.43 $\pm$ 20%    | 10.07 $\pm$ 62%   | 10.07 $\pm$ 31%  | 10.15 $\pm$ 51%  | 5.31 $\pm$ 119%     | 9.56 $\pm$ 81%    | 6.36 $\pm$ 89%    | 48.01 $\pm$ 88%   | 16.85 $\pm$ 67%  | 14.57 $\pm$ 100%  |
| 9,10-Anthracenedione                            | 0.25 $\pm$ 283%   | 0.53 $\pm$ 234%   | 0.78 $\pm$ 99%    | 0.70 $\pm$ 139%   | 1.71 $\pm$ 154%  | 1.66 $\pm$ 97%   | 1.17 $\pm$ 290%     | 0.89 $\pm$ 242%   | 1.12 $\pm$ 131%   | 3.34 $\pm$ 152%   | 2.85 $\pm$ 165%  | 2.38 $\pm$ 130%   |
| Isopropyl Palmitate                             | 0.14 $\pm$ 273%   | 1.56 $\pm$ 154%   | 1.58 $\pm$ 90%    | 2.45 $\pm$ 115%   | 2.62 $\pm$ 73%   | 2.19 $\pm$ 91%   | 0.66 $\pm$ 280%     | 2.61 $\pm$ 165%   | 2.27 $\pm$ 125%   | 11.69 $\pm$ 132%  | 4.38 $\pm$ 94%   | 3.14 $\pm$ 125%   |
| 2,2,4-Trimethyl-3,3-pentanediol monoisobutyrate | ND <sup>a,b</sup> | ND <sup>a,b</sup> | ND <sup>a,b</sup> | ND <sup>a</sup>   | ND <sup>a</sup>  | ND <sup>a</sup>  | ND <sup>a,b</sup>   | ND <sup>a,b</sup> | ND <sup>a,b</sup> | ND <sup>a</sup>   | ND <sup>a</sup>  | ND <sup>a</sup>   |
| Octanoic Acid                                   | 0.10 $\pm$ 245%   | 1.08 $\pm$ 93%    | 0.90 $\pm$ 54%    | 0.64 $\pm$ 236%   | 6.19 $\pm$ 41%   | 4.58 $\pm$ 91%   | 0.46 $\pm$ 253%     | 1.80 $\pm$ 111%   | 1.30 $\pm$ 102%   | 3.05 $\pm$ 244%   | 10.36 $\pm$ 72%  | 6.58 $\pm$ 125%   |
| Tetracosane                                     | 0.16 $\pm$ 220%   | 0.55 $\pm$ 280%   | 1.07 $\pm$ 139%   | 1.22 $\pm$ 152%   | 4.42 $\pm$ 206%  | 3.19 $\pm$ 105%  | 0.77 $\pm$ 229%     | 0.93 $\pm$ 286%   | 1.54 $\pm$ 164%   | 5.80 $\pm$ 165%   | 7.40 $\pm$ 215%  | 4.59 $\pm$ 136%   |

| Compound Name                                     | I/O               |                   |                   |                 |                 |                 | [I/O] <sup>i/m/z64</sup> |                   |                   |                 |                 |                 |
|---------------------------------------------------|-------------------|-------------------|-------------------|-----------------|-----------------|-----------------|--------------------------|-------------------|-------------------|-----------------|-----------------|-----------------|
|                                                   | Denuded           |                   |                   | Non-Denuded     |                 |                 | Denuded                  |                   |                   | Non-Denuded     |                 |                 |
|                                                   | WC                | 1WO               | 2WO               | WC              | 1WO             | 2WO             | WC                       | 1WO               | 2WO               | WC              | 1WO             | 2WO             |
| 5,9-Undecadien-2-one, 6,10-dimethyl-              | ND <sup>a,b</sup> | ND <sup>a</sup>   | ND <sup>a</sup>   | 8.45 ± 175%     | ND <sup>a</sup> | ND <sup>a</sup> | ND <sup>a,b</sup>        | ND <sup>a</sup>   | ND <sup>a</sup>   | 40.28 ± 186%    | ND <sup>a</sup> | ND <sup>a</sup> |
| Benzo[c]phenanthrene                              | 0.49 ± 171%       | 0.27 ± 351%       | 0.75 ± 299%       | 0.92 ± 125%     | 2.24 ± 188%     | 1.34 ± 85%      | 2.33 ± 182%              | 0.46 ± 356%       | 1.08 ± 311%       | 4.38 ± 140%     | 3.76 ± 198%     | 1.92 ± 121%     |
| 2-Propanol, 1-[1-methyl-2-(2-propenyloxy)ethoxy]- | ND <sup>a,b</sup> | ND <sup>a,b</sup> | ND <sup>a,b</sup> | ND <sup>a</sup> | ND <sup>a</sup> | ND <sup>a</sup> | ND <sup>a,b</sup>        | ND <sup>a,b</sup> | ND <sup>a,b</sup> | ND <sup>a</sup> | ND <sup>a</sup> | ND <sup>a</sup> |
| Di-(2-ethylhexyl)-phthalate                       | 0 ± 0             | ND <sup>a,b</sup> | 1.62 ± 159%       | 5.43 ± 458%     | 10.65 ± 256%    | 4.77 ± 114%     | 0 ± 0                    | ND <sup>a,b</sup> | 2.33 ± 181%       | 25.87 ± 463%    | 17.82 ± 263%    | 6.85 ± 143%     |
| Pentacosane                                       | 0.10 ± 266%       | ND <sup>a,b</sup> | 1.25 ± 226%       | 1.29 ± 195%     | 8.79 ± 361%     | 7.24 ± 157%     | 0.48 ± 273%              | ND <sup>a,b</sup> | 1.79 ± 242%       | 6.13 ± 205%     | 14.71 ± 366%    | 10.39 ± 179%    |
| Benzophenone                                      | 1.32 ± 52%        | 3.24 ± 39%        | 3.23 ± 22%        | 1.04 ± 80%      | 2.19 ± 24%      | 2.39 ± 33%      | 6.30 ± 82%               | 5.42 ± 71%        | 4.64 ± 89%        | 4.98 ± 102%     | 3.67 ± 64%      | 3.44 ± 93%      |
| Benzoic acid, 2-ethylhexyl ester                  | 3.72 ± 64%        | 8.18 ± 21%        | 6.79 ± 19%        | 36.83 ± 33%     | 22.02 ± 19%     | 21.02 ± 20%     | 17.71 ± 90%              | 13.69 ± 63%       | 9.75 ± 88%        | 175.51 ± 71%    | 36.85 ± 62%     | 30.19 ± 89%     |
| alpha cedrene*                                    | 3.89 ± 39%        | 5.40 ± 22%        | 5.00 ± 21%        | 19.32 ± 29%     | 15.04 ± 38%     | 13.54 ± 27%     | 18.55 ± 74%              | 9.03 ± 63%        | 7.18 ± 89%        | 92.04 ± 69%     | 25.17 ± 71%     | 19.44 ± 90%     |
| Benzene, (1-butylloctyl)-                         | 5.01 ± 46%        | 7.31 ± 30%        | 5.75 ± 33%        | 21.58 ± 28%     | 14.83 ± 21%     | 15.46 ± 21%     | 23.86 ± 78%              | 12.23 ± 66%       | 8.26 ± 93%        | 102.81 ± 69%    | 24.82 ± 63%     | 22.20 ± 89%     |
| Phytane                                           | 1.97 ± 65%        | 3.99 ± 104%       | 5.75 ± 10%        | 10.71 ± 37%     | 7.78 ± 16%      | 9.20 ± 15%      | 9.39 ± 90%               | 6.68 ± 120%       | 8.26 ± 87%        | 51.01 ± 73%     | 13.03 ± 61%     | 13.21 ± 88%     |
| Benzene, (1-pentylheptyl)-                        | 5.44 ± 53%        | 8.54 ± 25%        | 7.19 ± 16%        | 21.33 ± 37%     | 14.70 ± 31%     | 15.45 ± 21%     | 25.91 ± 82%              | 14.30 ± 64%       | 10.32 ± 88%       | 101.65 ± 73%    | 24.61 ± 67%     | 22.18 ± 89%     |
| Dimethyl Phthalate                                | 3.53 ± 96%        | 16.93 ± 122%      | 7.09 ± 36%        | 49.82 ± 37%     | 35.05 ± 23%     | 29.81 ± 29%     | 16.82 ± 115%             | 28.34 ± 136%      | 10.18 ± 94%       | 237.39 ± 73%    | 58.66 ± 64%     | 42.81 ± 91%     |
| Octanal, 2-phenylmethylene-                       | 1.53 ± 66%        | 6.72 ± 48%        | 6.29 ± 28%        | 32.45 ± 47%     | 21.83 ± 33%     | 4.59 ± 217%     | 7.29 ± 91%               | 11.24 ± 76%       | 9.03 ± 91%        | 154.63 ± 79%    | 36.53 ± 68%     | 6.58 ± 233%     |
| Heptadecane                                       | 4.64 ± 39%        | 8.22 ± 15%        | 6.49 ± 27%        | 10.78 ± 52%     | 11.57 ± 20%     | 10.47 ± 37%     | 22.12 ± 74%              | 13.76 ± 61%       | 9.31 ± 90%        | 51.38 ± 82%     | 19.37 ± 63%     | 15.04 ± 94%     |
| Diethyl Phthalate*                                | 2.61 ± 86%        | 7.38 ± 43%        | 6.95 ± 22%        | 45.31 ± 63%     | 35.96 ± 24%     | 31.67 ± 27%     | 12.46 ± 106%             | 12.35 ± 73%       | 9.98 ± 89%        | 215.91 ± 89%    | 60.18 ± 64%     | 45.48 ± 90%     |
| Pentadecane*                                      | 4.24 ± 25%        | 4.75 ± 25%        | 3.17 ± 33%        | 6.06 ± 87%      | 7.88 ± 29%      | 6.03 ± 39%      | 20.19 ± 68%              | 7.95 ± 64%        | 4.55 ± 92%        | 28.86 ± 107%    | 13.18 ± 66%     | 8.66 ± 95%      |
| Octadecane                                        | 1.91 ± 66%        | 6.92 ± 20%        | 5.96 ± 22%        | 12.51 ± 37%     | 9.29 ± 16%      | 10.16 ± 18%     | 9.10 ± 91%               | 11.59 ± 63%       | 8.56 ± 89%        | 59.61 ± 73%     | 15.55 ± 61%     | 14.60 ± 88%     |

| Compound Name                          | <i>I/O</i>        |                   |                   |                   |                   |                   | <i>[I/O]<sub>i/m/z:64</sub></i> |                   |                   |                   |                   |                   |
|----------------------------------------|-------------------|-------------------|-------------------|-------------------|-------------------|-------------------|---------------------------------|-------------------|-------------------|-------------------|-------------------|-------------------|
|                                        | Denuded           |                   |                   | Non-Denuded       |                   |                   | Denuded                         |                   |                   | Non-Denuded       |                   |                   |
|                                        | WC                | 1WO               | 2WO               | WC                | 1WO               | 2WO               | WC                              | 1WO               | 2WO               | WC                | 1WO               | 2WO               |
| TXIB*                                  | 7.45 ±<br>99%     | 11.05 ±<br>48%    | 9.80 ±<br>26%     | 81.55 ±<br>47%    | 48.20 ±<br>29%    | 39.03 ±<br>31%    | 35.48 ±<br>117%                 | 18.50 ±<br>76%    | 14.07 ±<br>90%    | 388.57 ±<br>79%   | 80.67 ±<br>66%    | 56.04 ±<br>92%    |
| Pentadecane, 3-methyl-                 | 8.34 ±<br>33%     | 9.45 ±<br>50%     | 10.10 ±<br>76%    | 17.69 ±<br>91%    | 15.59 ±<br>75%    | 21.15 ±<br>62%    | 39.72 ±<br>71%                  | 15.82 ±<br>77%    | 14.50 ±<br>115%   | 84.28 ±<br>111%   | 26.09 ±<br>96%    | 30.37 ±<br>106%   |
| Tonalid                                | 1.25 ±<br>86%     | 6.21 ±<br>37%     | 6.60 ±<br>32%     | 15.92 ±<br>46%    | 8.99 ±<br>23%     | 9.49 ±<br>19%     | 5.95 ±<br>106%                  | 10.39 ±<br>70%    | 9.48 ±<br>92%     | 75.87 ±<br>78%    | 15.05 ±<br>64%    | 13.62 ±<br>88%    |
| beta cedrene                           | 2.62 ±<br>34%     | 8.09 ±<br>32%     | 4.97 ±<br>25%     | 26.40 ±<br>47%    | 16.10 ±<br>34%    | 13.75 ±<br>38%    | 12.48 ±<br>72%                  | 13.54 ±<br>67%    | 7.14 ±<br>90%     | 125.78 ±<br>79%   | 26.95 ±<br>68%    | 19.74 ±<br>94%    |
| Carvone*                               | ND <sup>a,b</sup> | ND <sup>a,b</sup> | ND <sup>a,b</sup> | 90.56 ±<br>332%   | 8.77 ±<br>169%    | ND <sup>a,b</sup> | ND <sup>a,b</sup>               | ND <sup>a,b</sup> | ND <sup>a,b</sup> | 431.51 ±<br>338%  | 14.68 ±<br>180%   | ND <sup>a,b</sup> |
| Cycloheptasiloxane, tetradecamethyl-*  | 2.18 ±<br>64%     | 1.58 ±<br>35%     | 1.50 ±<br>38%     | 4.61 ±<br>48%     | 2.69 ±<br>29%     | 2.26 ±<br>50%     | 10.41 ±<br>90%                  | 2.65 ±<br>69%     | 2.15 ±<br>94%     | 21.97 ±<br>79%    | 4.50 ±<br>66%     | 3.25 ±<br>100%    |
| Nonadecane                             | 0.94 ±<br>67%     | 3.52 ±<br>32%     | 3.58 ±<br>27%     | 6.14 ±<br>42%     | 4.74 ±<br>24%     | 6.22 ±<br>18%     | 4.46 ±<br>92%                   | 5.88 ±<br>67%     | 5.15 ±<br>91%     | 29.26 ±<br>76%    | 7.94 ±<br>64%     | 8.93 ±<br>88%     |
| 2-Decanone*                            | 0.75 ±<br>124%    | 3.70 ±<br>162%    | 2.04 ±<br>75%     | 5.16 ±<br>54%     | 4.33 ±<br>24%     | 3.61 ±<br>58%     | 3.56 ±<br>139%                  | 6.20 ±<br>172%    | 2.93 ±<br>114%    | 24.61 ±<br>83%    | 7.25 ±<br>64%     | 5.18 ±<br>104%    |
| Sandaracopimaradiene                   | 0.73 ±<br>61%     | 2.09 ±<br>37%     | 2.80 ±<br>61%     | 4.28 ±<br>38%     | 2.84 ±<br>38%     | 4.22 ±<br>55%     | 3.50 ±<br>88%                   | 3.49 ±<br>70%     | 4.02 ±<br>106%    | 20.40 ±<br>74%    | 4.76 ±<br>71%     | 6.06 ±<br>103%    |
| Dodecanoic acid, methyl ester          | 4.66 ±<br>140%    | 15.22 ±<br>200%   | ND <sup>a</sup>   | 87.23 ±<br>147%   | ND <sup>a</sup>   | 91.22 ±<br>174%   | 22.22 ±<br>153%                 | 25.47 ±<br>209%   | ND <sup>a</sup>   | 415.66 ±<br>160%  | ND <sup>a</sup>   | 130.99 ±<br>194%  |
| Isobutanoic acid, phenoxyethanol ester | 16.59 ±<br>355%   | ND <sup>a</sup>   | ND <sup>a</sup>   | 4.78 ±<br>226%    | ND <sup>a</sup>   | ND <sup>a</sup>   | 79.06 ±<br>360%                 | ND <sup>a</sup>   | ND <sup>a</sup>   | 22.79 ±<br>235%   | ND <sup>a</sup>   | ND <sup>a</sup>   |
| Dodecanal                              | 0.58 ±<br>204%    | 5.03 ±<br>124%    | 3.91 ±<br>172%    | 12.25 ±<br>69%    | 9.63 ±<br>29%     | 7.61 ±<br>80%     | 2.78 ±<br>214%                  | 8.42 ±<br>137%    | 5.61 ±<br>193%    | 58.38 ±<br>93%    | 16.12 ±<br>66%    | 10.93 ±<br>118%   |
| Hexasiloxane, tetradecamethyl-*        | 15.56 ±<br>56%    | 10.49 ±<br>36%    | 10.03 ±<br>54%    | 46.82 ±<br>46%    | 27.66 ±<br>110%   | 29.30 ±<br>39%    | 74.13 ±<br>84%                  | 17.56 ±<br>70%    | 14.40 ±<br>102%   | 223.12 ±<br>78%   | 46.28 ±<br>125%   | 42.08 ±<br>95%    |
| Isophorone                             | ND <sup>a,b</sup>               | ND <sup>a,b</sup> | ND <sup>a,b</sup> | ND <sup>a,b</sup> | ND <sup>a,b</sup> | ND <sup>a,b</sup> |
| Galaxolide                             | 1.42 ±<br>119%    | 9.27 ±<br>89%     | 11.51 ±<br>64%    | 55.07 ±<br>78%    | 6.73 ±<br>222%    | 29.74 ±<br>50%    | 6.77 ±<br>135%                  | 15.51 ±<br>107%   | 16.53 ±<br>107%   | 262.43 ±<br>100%  | 11.26 ±<br>230%   | 42.70 ±<br>100%   |
| Limonene                               | ND <sup>a</sup>   | ND <sup>a</sup>   | 14.21 ±<br>269%   | ND <sup>a</sup>   | 60.20 ±<br>318%   | 5.00 ±<br>111%    | ND <sup>a</sup>                 | ND <sup>a</sup>   | 20.40 ±<br>282%   | ND <sup>a</sup>   | 100.75 ±<br>323%  | 7.18 ±<br>141%    |
| Ethanol, 2-phenoxy-                    | ND <sup>a,b</sup> | ND <sup>a,b</sup> | ND <sup>a,b</sup> | ND <sup>a</sup>   | ND <sup>a</sup>   | ND <sup>a</sup>   | ND <sup>a,b</sup>               | ND <sup>a,b</sup> | ND <sup>a,b</sup> | ND <sup>a</sup>   | ND <sup>a</sup>   | ND <sup>a</sup>   |
| 1(2H)-Naphthalenone, 3,4-dihydro-      | 0.34 ±<br>70%     | 0.67 ±<br>25%     | 0.63 ±<br>38%     | 0.54 ±<br>32%     | 0.78 ±<br>14%     | 0.90 ±<br>50%     | 1.60 ±<br>94%                   | 1.13 ±<br>64%     | 0.90 ±<br>94%     | 2.58 ±<br>71%     | 1.31 ±<br>61%     | 1.30 ±<br>100%    |

| Compound Name                                    | I/O            |                |               |                 |                 |                 | I/O <sup>i/m/z64</sup> |                |                |                 |                 |                 |
|--------------------------------------------------|----------------|----------------|---------------|-----------------|-----------------|-----------------|------------------------|----------------|----------------|-----------------|-----------------|-----------------|
|                                                  | Denuded        |                |               | Non-Denuded     |                 |                 | Denuded                |                |                | Non-Denuded     |                 |                 |
|                                                  | WC             | 1WO            | 2WO           | WC              | 1WO             | 2WO             | WC                     | 1WO            | 2WO            | WC              | 1WO             | 2WO             |
| Fluoranthene                                     | 0.91 ±<br>32%  | 0.94 ±<br>15%  | 1.09 ±<br>24% | 0.99 ±<br>29%   | 1.06 ±<br>23%   | 1.31 ±<br>29%   | 4.33 ±<br>71%          | 1.58 ±<br>61%  | 1.57 ±<br>90%  | 4.71 ±<br>70%   | 1.77 ±<br>63%   | 1.88 ±<br>91%   |
| 1-Tetradecene                                    | 0.73 ±<br>37%  | 1.15 ±<br>24%  | 1.25 ±<br>30% | 1.67 ±<br>26%   | 1.66 ±<br>13%   | 1.75 ±<br>33%   | 3.49 ±<br>73%          | 1.92 ±<br>64%  | 1.79 ±<br>91%  | 7.97 ±<br>68%   | 2.78 ±<br>61%   | 2.51 ±<br>92%   |
| Pyrene*                                          | 0.71 ±<br>63%  | 0.94 ±<br>31%  | 1.10 ±<br>40% | 1.03 ±<br>42%   | 1.12 ±<br>23%   | 1.24 ±<br>37%   | 3.37 ±<br>89%          | 1.57 ±<br>67%  | 1.58 ±<br>95%  | 4.89 ±<br>76%   | 1.88 ±<br>63%   | 1.78 ±<br>94%   |
| Coumarin                                         | 0.07 ±<br>335% | 0.64 ±<br>116% | 0.73 ±<br>58% | 1.22 ±<br>30%   | 1.31 ±<br>26%   | 1.55 ±<br>44%   | 0.35 ±<br>341%         | 1.08 ±<br>130% | 1.05 ±<br>104% | 5.82 ±<br>70%   | 2.20 ±<br>65%   | 2.22 ±<br>97%   |
| 9H-Fluoren-9-one                                 | 0.87 ±<br>28%  | 1.19 ±<br>16%  | 1.15 ±<br>33% | 1.81 ±<br>24%   | 1.92 ±<br>18%   | 2.15 ±<br>40%   | 4.17 ±<br>69%          | 1.99 ±<br>61%  | 1.65 ±<br>93%  | 8.61 ±<br>68%   | 3.21 ±<br>62%   | 3.08 ±<br>95%   |
| Heptylbenzene                                    | 0.78 ±<br>33%  | 1.30 ±<br>18%  | 1.29 ±<br>25% | 1.68 ±<br>32%   | 1.67 ±<br>23%   | 1.73 ±<br>31%   | 3.71 ±<br>71%          | 2.18 ±<br>62%  | 1.86 ±<br>90%  | 7.98 ±<br>71%   | 2.79 ±<br>64%   | 2.49 ±<br>92%   |
| Dibenzofuran                                     | 1.13 ±<br>23%  | 1.28 ±<br>21%  | 1.28 ±<br>24% | 1.74 ±<br>25%   | 1.39 ±<br>40%   | 1.85 ±<br>39%   | 5.39 ±<br>67%          | 2.15 ±<br>63%  | 1.84 ±<br>90%  | 8.27 ±<br>68%   | 2.33 ±<br>72%   | 2.65 ±<br>95%   |
| 1H-Indene, 2,3-dihydro-1,1,3-trimethyl-3-phenyl- | 0.54 ±<br>120% | 1.62 ±<br>140% | 1.09 ±<br>51% | 1.14 ±<br>61%   | 1.44 ±<br>37%   | 1.32 ±<br>45%   | 2.56 ±<br>135%         | 2.71 ±<br>152% | 1.56 ±<br>100% | 5.45 ±<br>88%   | 2.41 ±<br>70%   | 1.89 ±<br>97%   |
| Heneicosane                                      | 0.58 ±<br>81%  | 1.08 ±<br>33%  | 1.56 ±<br>76% | 1.42 ±<br>65%   | 1.39 ±<br>38%   | 1.35 ±<br>61%   | 2.74 ±<br>103%         | 1.80 ±<br>68%  | 2.24 ±<br>115% | 6.77 ±<br>91%   | 2.32 ±<br>71%   | 1.94 ±<br>106%  |
| Phenanthrene                                     | 1.05 ±<br>29%  | 1.66 ±<br>29%  | 1.76 ±<br>16% | 2.30 ±<br>30%   | 2.06 ±<br>33%   | 2.70 ±<br>33%   | 5.02 ±<br>70%          | 2.77 ±<br>66%  | 2.53 ±<br>88%  | 10.95 ±<br>70%  | 3.44 ±<br>68%   | 3.87 ±<br>93%   |
| gamma-nonalactone*                               | 0.64 ±<br>50%  | 0.99 ±<br>21%  | 0.98 ±<br>14% | 0.88 ±<br>40%   | 2.12 ±<br>22%   | 2.35 ±<br>22%   | 3.05 ±<br>81%          | 1.66 ±<br>63%  | 1.41 ±<br>88%  | 4.18 ±<br>75%   | 3.54 ±<br>63%   | 3.38 ±<br>89%   |
| Ethanone, 1-(4-methylphenyl)-                    | 0.55 ±<br>43%  | 1.00 ±<br>51%  | 1.00 ±<br>27% | ND <sup>a</sup> | ND <sup>a</sup> | ND <sup>a</sup> | 2.61 ±<br>76%          | 1.68 ±<br>78%  | 1.44 ±<br>90%  | ND <sup>a</sup> | ND <sup>a</sup> | ND <sup>a</sup> |
| Phthalic Acid                                    | 0.77 ±<br>28%  | 1.06 ±<br>23%  | 1.01 ±<br>30% | 2.20 ±<br>49%   | 1.64 ±<br>34%   | 1.40 ±<br>28%   | 3.68 ±<br>69%          | 1.78 ±<br>64%  | 1.45 ±<br>91%  | 10.50 ±<br>80%  | 2.75 ±<br>69%   | 2.01 ±<br>91%   |
| Benzene, 1,1'-cyclohexylidenebis-                | 0.86 ±<br>62%  | 2.55 ±<br>31%  | 2.63 ±<br>25% | 3.27 ±<br>19%   | 2.61 ±<br>15%   | 2.74 ±<br>20%   | 4.10 ±<br>88%          | 4.27 ±<br>67%  | 3.78 ±<br>90%  | 15.60 ±<br>66%  | 4.37 ±<br>61%   | 3.94 ±<br>89%   |
| Docosane                                         | 0.40 ±<br>104% | 1.11 ±<br>36%  | 1.13 ±<br>56% | 1.33 ±<br>81%   | 1.60 ±<br>33%   | 1.45 ±<br>65%   | 1.92 ±<br>122%         | 1.86 ±<br>69%  | 1.62 ±<br>103% | 6.32 ±<br>103%  | 2.69 ±<br>68%   | 2.09 ±<br>108%  |
| Biphenylene                                      | 0.73 ±<br>62%  | 0.69 ±<br>49%  | 0.86 ±<br>25% | 0.98 ±<br>41%   | 1.41 ±<br>72%   | 1.68 ±<br>59%   | 3.46 ±<br>89%          | 1.16 ±<br>77%  | 1.23 ±<br>90%  | 4.66 ±<br>76%   | 2.36 ±<br>93%   | 2.41 ±<br>104%  |
| Cyclooctasiloxane, hexadecamethyl-               | 1.05 ±<br>90%  | 1.90 ±<br>24%  | 1.83 ±<br>26% | 3.27 ±<br>34%   | 2.38 ±<br>24%   | 2.47 ±<br>28%   | 5.02 ±<br>110%         | 3.18 ±<br>64%  | 2.63 ±<br>90%  | 15.56 ±<br>72%  | 3.99 ±<br>64%   | 3.55 ±<br>91%   |

|                              | <i>I/O</i>     |                |               |               |                |                | $[I/O]_{i/m/z64}$ |                |                |                |                |                |
|------------------------------|----------------|----------------|---------------|---------------|----------------|----------------|-------------------|----------------|----------------|----------------|----------------|----------------|
|                              | Denuded        |                |               | Non-Denuded   |                |                | Denuded           |                |                | Non-Denuded    |                |                |
|                              | WC             | 1WO            | 2WO           | WC            | 1WO            | 2WO            | WC                | 1WO            | 2WO            | WC             | 1WO            | 2WO            |
| Benzene, (1-methyltridecyl)- | 0.77 ±<br>63%  | 2.06 ±<br>34%  | 2.46 ±<br>27% | 3.95 ±<br>46% | 2.99 ±<br>33%  | 3.54 ±<br>19%  | 3.67 ±<br>89%     | 3.45 ±<br>68%  | 3.53 ±<br>90%  | 18.80 ±<br>78% | 5.01 ±<br>68%  | 5.08 ±<br>88%  |
| Chrysene                     | 0.53 ±<br>96%  | 0.87 ±<br>140% | 1.05 ±<br>72% | 1.15 ±<br>91% | 1.77 ±<br>56%  | 1.79 ±<br>73%  | 2.54 ±<br>115%    | 1.45 ±<br>152% | 1.51 ±<br>113% | 5.49 ±<br>111% | 2.96 ±<br>81%  | 2.57 ±<br>113% |
| Eicosane                     | 0.70 ±<br>55%  | 1.52 ±<br>39%  | 1.89 ±<br>45% | 2.39 ±<br>54% | 2.01 ±<br>39%  | 6.50 ±<br>188% | 3.31 ±<br>84%     | 2.54 ±<br>71%  | 2.72 ±<br>97%  | 11.37 ±<br>83% | 3.36 ±<br>71%  | 9.33 ±<br>207% |
| Levoglucosenone              | 0.07 ±<br>345% | 0.53 ±<br>125% | 0.59 ±<br>89% | 0 ± 0%        | 0.36 ±<br>159% | 0.46 ±<br>156% | 0.34 ±<br>351%    | 0.89 ±<br>138% | 0.84 ±<br>124% | 0 ± 0%         | 0.59 ±<br>169% | 0.66 ±<br>179% |

<sup>a</sup> *I/O* and  $[I/O]_i/[I/O]_{m/z64}$  values were not calculated for this condition because  $O = 0$ .

<sup>b</sup> *I/O* and  $[I/O]_i/[I/O]_{m/z64}$  values were not calculated for this condition because  $O = 0$  and  $I = 0$ .



**Table S9.**  $I/I_{WC}$  and indoor-to-outdoor ratios ( $I/O$ ) averaged over the three natural ventilation conditions for VOCs measured in adsorbent tubes. For each point, error is reported as  $\pm$  one standard deviation as a percent of the average value. Compounds marked with an asterisk designate those included in figures 8 and 9 within main text. Cells marked “ND” (no data) indicate that the value was not computed for reasons described in the table footnotes.

| Compound            | $I/I_{WC}$   |                |                 | $I/O$            |                  |                 |
|---------------------|--------------|----------------|-----------------|------------------|------------------|-----------------|
|                     | WC           | 1WO            | 2WO             | WC               | 1WO              | 2WO             |
| Furfuryl Alcohol    | 1 $\pm$ 57%  | 0.45 $\pm$ 76% | 0.26 $\pm$ 56%  | ND <sup>a</sup>  | ND <sup>a</sup>  | ND <sup>a</sup> |
| Phenol              | 1 $\pm$ 54%  | 0.81 $\pm$ 48% | 0.85 $\pm$ 43%  | 2.66 $\pm$ 84%   | 1.66 $\pm$ 53%   | 1.31 $\pm$ 35%  |
| Menthol             | 1 $\pm$ 35%  | 0.50 $\pm$ 41% | 0.33 $\pm$ 30%  | 71.91 $\pm$ 266% | 81.22 $\pm$ 333% | 7.36 $\pm$ 113% |
| Hexanal             | 1 $\pm$ 45%  | 0.38 $\pm$ 48% | 0.33 $\pm$ 42%  | 7.37 $\pm$ 189%  | 8.61 $\pm$ 92%   | 5.34 $\pm$ 67%  |
| Heptanal            | 1 $\pm$ 45%  | 0.54 $\pm$ 45% | 0.68 $\pm$ 37%  | 5.02 $\pm$ 152%  | 4.93 $\pm$ 86%   | 6.11 $\pm$ 70%  |
| Benzaldehyde        | 1 $\pm$ 44%  | 0.53 $\pm$ 44% | 0.64 $\pm$ 35%  | 3.67 $\pm$ 117%  | 4.30 $\pm$ 83%   | 2.97 $\pm$ 60%  |
| Octanal             | 1 $\pm$ 43%  | 0.75 $\pm$ 42% | 1.11 $\pm$ 38%  | 2.12 $\pm$ 116%  | 3.76 $\pm$ 54%   | 3.19 $\pm$ 47%  |
| Nonanal             | 1 $\pm$ 57%  | 0.78 $\pm$ 49% | 1.15 $\pm$ 47%  | 1.45 $\pm$ 85%   | 2.32 $\pm$ 51%   | 1.57 $\pm$ 68%  |
| Decanal             | 1 $\pm$ 41%  | 0.58 $\pm$ 38% | 0.48 $\pm$ 36%  | 3.52 $\pm$ 76%   | 1.88 $\pm$ 47%   | 1.41 $\pm$ 31%  |
| Methycyclohexane    | 1 $\pm$ 77%  | 0.39 $\pm$ 78% | 0.18 $\pm$ 77%  | 10.72 $\pm$ 113% | 2.04 $\pm$ 118%  | 0.93 $\pm$ 101% |
| Ethylcyclohexane    | 1 $\pm$ 51%  | 0.30 $\pm$ 89% | 0.13 $\pm$ 93%  | 42.50 $\pm$ 380% | 4.46 $\pm$ 193%  | 1.43 $\pm$ 155% |
| p-Xylene            | 1 $\pm$ 43%  | 0.41 $\pm$ 36% | 0.32 $\pm$ 37%  | 2.92 $\pm$ 79%   | 0.84 $\pm$ 55%   | 0.77 $\pm$ 46%  |
| o-Xylene            | 1 $\pm$ 48%  | 0.38 $\pm$ 39% | 0.30 $\pm$ 40%  | 3.20 $\pm$ 88%   | 0.92 $\pm$ 54%   | 0.81 $\pm$ 41%  |
| Styrene             | 1 $\pm$ 41%  | 0.37 $\pm$ 39% | 0.28 $\pm$ 40%  | 18.88 $\pm$ 148% | 5.05 $\pm$ 113%  | 4.29 $\pm$ 123% |
| Trimethylbenzene    | 1 $\pm$ 38%  | 0.57 $\pm$ 31% | 0.42 $\pm$ 35%  | 1.79 $\pm$ 101%  | 0.70 $\pm$ 61%   | 0.63 $\pm$ 52%  |
| Naphthalene         | 1 $\pm$ 38%  | 0.65 $\pm$ 38% | 0.49 $\pm$ 31%  | 9.94 $\pm$ 61%   | 3.63 $\pm$ 64%   | 4.12 $\pm$ 43%  |
| Tetrachloroethylene | 1 $\pm$ 89%  | 0.29 $\pm$ 82% | 0.02 $\pm$ 206% | 52.10 $\pm$ 339% | 10.10 $\pm$ 230% | 0.32 $\pm$ 250% |
| Acetophenone        | 1 $\pm$ 40%  | 0.48 $\pm$ 62% | 0.33 $\pm$ 106% | 2.09 $\pm$ 137%  | 0.53 $\pm$ 87%   | 0.55 $\pm$ 128% |
| a-Pinene            | 1 $\pm$ 48%  | 0.23 $\pm$ 69% | 0.13 $\pm$ 47%  | 35.08 $\pm$ 67%  | 5.96 $\pm$ 74%   | 2.67 $\pm$ 49%  |
| 3-Carene            | 1 $\pm$ 47%  | 0.28 $\pm$ 67% | 0.14 $\pm$ 113% | 55.49 $\pm$ 558% | ND <sup>a</sup>  | ND <sup>a</sup> |
| a-Phellandrene      | 1 $\pm$ 48%  | 0.30 $\pm$ 48% | 0.21 $\pm$ 43%  | 63.09 $\pm$ 261% | 7.74 $\pm$ 191%  | 2.74 $\pm$ 71%  |
| Limonene            | 1 $\pm$ 39%  | 0.28 $\pm$ 41% | 0.21 $\pm$ 38%  | 16.76 $\pm$ 100% | 4.03 $\pm$ 95%   | 4.26 $\pm$ 59%  |
| g-Terpinene         | 1 $\pm$ 65%  | 0 $\pm$ 0%     | 0.04 $\pm$ 287% | 59.11 $\pm$ 559% | ND <sup>a</sup>  | 0.58 $\pm$ 400% |
| Fenchol             | 1 $\pm$ 48%  | 0.40 $\pm$ 72% | 0.19 $\pm$ 73%  | ND <sup>a</sup>  | ND <sup>a</sup>  | ND <sup>a</sup> |
| Camphor             | 1 $\pm$ 47%  | 0.41 $\pm$ 56% | 0.28 $\pm$ 38%  | ND <sup>a</sup>  | ND <sup>a</sup>  | ND <sup>a</sup> |
| a-Terpineol         | 1 $\pm$ 105% | 0.74 $\pm$ 83% | 0.98 $\pm$ 89%  | 2.85 $\pm$ 129%  | 1.76 $\pm$ 84%   | 1.27 $\pm$ 71%  |

| Compound           | <i>I/I<sub>wc</sub></i> |             |            | <i>I/O</i>     |               |               |
|--------------------|-------------------------|-------------|------------|----------------|---------------|---------------|
|                    | WC                      | 1WO         | 2WO        | WC             | 1WO           | 2WO           |
| Cyclotrisiloxane   | 1 ± 132%                | 0.54 ± 101% | 0.77 ± 99% | 1.69 ± 165%    | 0.46 ± 120%   | 1.04 ± 66%    |
| Cyclotetrasiloxane | 1 ± 62%                 | 0.41 ± 51%  | 0.47 ± 56% | 3.95 ± 100%    | 1.01 ± 97%    | 1.31 ± 59%    |
| Cyclopentasiloxane | 1 ± 70%                 | 0.29 ± 63%  | 0.20 ± 69% | 44.45 ± 112%   | 10.04 ± 78%   | 6.92 ± 52%    |
| Cyclohexasiloxane  | 1 ± 48%                 | 0.45 ± 40%  | 0.37 ± 41% | 6.54 ± 60%     | 4.03 ± 82%    | 3.01 ± 32%    |
| Hexafluorobenzene  | 1 ± 62%                 | 0.25 ± 89%  | 0.12 ± 51% | 1236.94 ± 180% | 189.18 ± 146% | 133.33 ± 191% |

<sup>a</sup> *I/O* values were not calculated for this condition because *O* = 0.

## Section S10: TAG Thermal Decomposition Analysis

The TAG thermal decomposition period (Figure 3) was used to evaluate two outdoor-originating species: sulfates ( $m/z$  64) and isoprene epoxydiols (IEPOX;  $m/z$  82). For certain ions in the decomposition period, including  $m/z$  64 and  $m/z$  82, we occasionally observed a detector artifact wherein signals abruptly dropped from above the detector threshold to zero before recovering to values above threshold in subsequent scans. To correct individual single ion chromatograms (SIC) for this effect, we took the average of the nearest five non-zero intensities on the left and on the right of the observed signal drop, then linearly interpolated between the left and right averages. If the interpolated value exceeded the detection limit for the ion, the value was substituted in place of the zero signal in the chromatogram; if not, the zero value was retained. Signals plotted in Figures S14 and S15 were obtained by integrating each SIC from minute 6-16 of TAG chromatographic analysis.

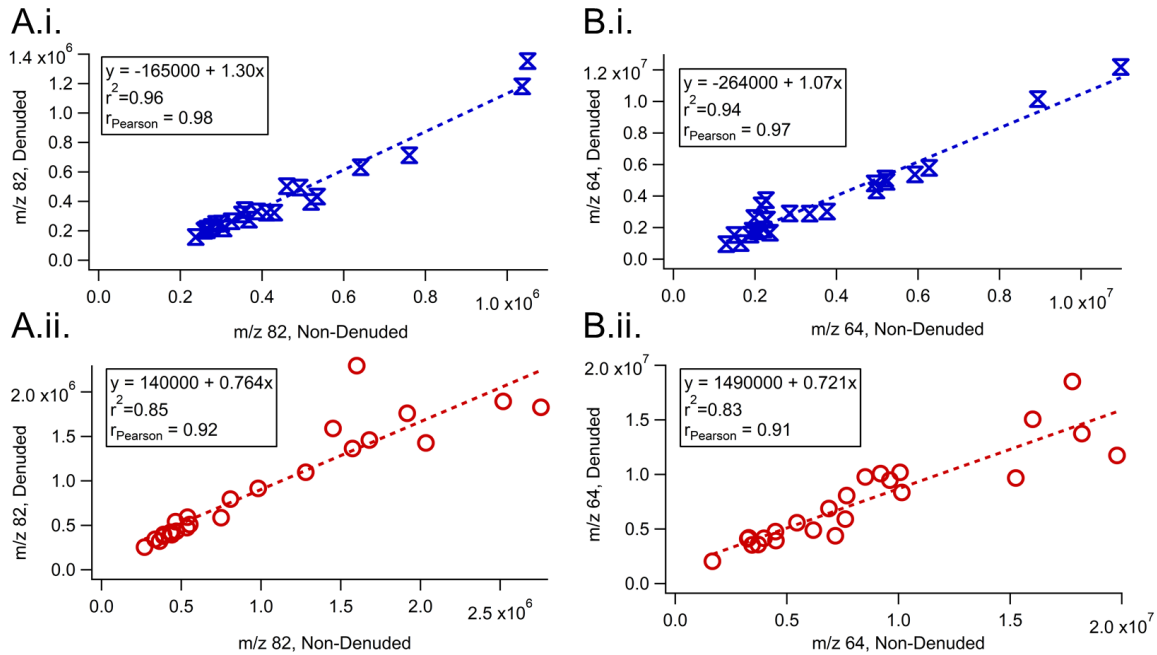

Figure S14. Integrated non-denuded vs denuded SICs for (A)  $m/z$  82 and (B)  $m/z$  64 across (i) indoor and (ii) outdoor chromatograms. The plotted signals were obtained by integrating each single ion chromatogram from minute 6-16 of TAG chromatographic analysis. To determine these correlations, denuded and non-denuded signals were paired such that collections took place one hour apart.

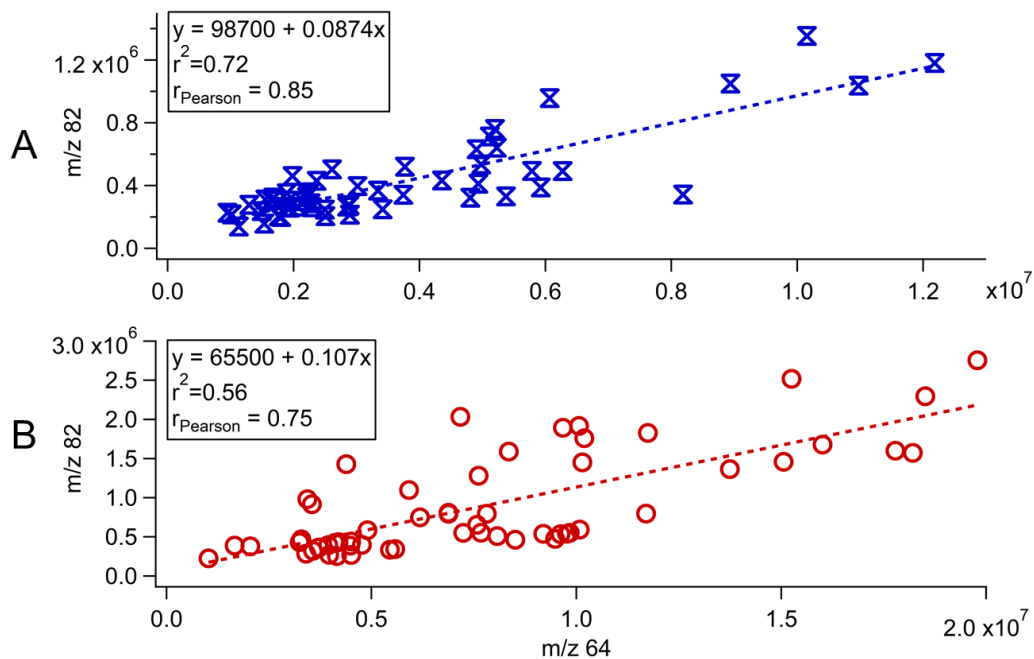

Figure S15. Integrated  $m/z$  82 (IEPOX tracer) vs  $m/z$  64 (sulfate tracer) signals across the TAG thermal decomposition period for (A) indoor and (B) outdoor chromatograms. The plotted signals were obtained by integrating each single ion chromatogram from minute 6-16 of TAG chromatographic analysis. Each point was obtained using one chromatogram. Because we found little difference between non-denuded and denuded decomposition signals for these ions (Figure S13), we assume negligible contribution from gas-phase IEPOX and sulfate species, and non-denuded and denuded signals are included together in each panel.

## Section S11: Evaluation of Temperature- and Particle Concentration-Driven Phase Partitioning

As windows are opened, gas-to-particle phase partitioning of many S/IVOCs increases, potentially because particles infiltrating indoors from outdoor air act as a condensational sink. However, temperature gradients between the outdoor and indoor environment will also influence phase partitioning of S/IVOCs. In this section, we predict the relative contributions of increased particle concentrations and temperature gradients to overall observed phase partitioning within our simplified system.

The partitioning constant for a species  $i$  ( $K_{p,i}$ ,  $\text{m}^3 \mu\text{g}^{-1}$ ) relates the concentration of  $i$  in the gas and particle phases ( $C_{g,i}$  and  $C_{p,i}$ , respectively,  $\text{ng m}^{-3}$ ):

$$K_{p,i} = \frac{c_{p,i}/PM}{C_{g,i}} = \frac{\left(\frac{C_{OM}}{C_{Tot}}\right)760RT}{MW_{OM}\zeta_i P_{L,i}^\circ 10^6} \quad (\text{S4})$$

Here,  $PM$  is the concentration of total particulate matter ( $\mu\text{g m}^{-3}$ ),  $C_{OM}/C_{Tot}$  is the ratio of concentration of organic matter to total aerosol concentration,  $R$  is the ideal gas constant ( $\text{m}^3 \text{atm mol}^{-1} \text{K}^{-1}$ ),  $T$  is temperature (K),  $MW_{OM}$  is the average molecular weight of organic compounds within the aerosol ( $\text{g mol}^{-1}$ ),  $\zeta_i$  is the activity coefficient of compound  $i$ , which is inversely proportional to the compound's affinity for the particle phase, and  $P_{L,i}^\circ$  is the subcooled liquid vapor pressure at temperature  $T$  (torr).

The fraction of species  $i$  in the particle phase is defined in terms of  $K_{p,i}$ :

$$f_{p,i} = \frac{c_{p,i}}{c_{p,i}+c_{g,i}} = \frac{K_{p,i}PM}{K_{p,i}PM+1} \quad (\text{S5})$$

In the following phase partitioning approximations, we choose four phthalates (dimethyl phthalate, diethyl phthalate, dibutyl phthalate, and bis(2-ethylhexyl)phthalate) as model compounds to assess partitioning for a range of relevant volatilities. Calculations are performed using particle concentration and temperature data from 00:00 7/31/2016-00:00 8/1/2016 (Figures 10C and S6A for concentration and temperature, respectively). This time frame was chosen because the second window was opened at 10:00 7/31/2016, driving the most significant changes in indoor particle concentrations. Furthermore, assessing a 24-hour period allows for evaluation of temperature gradient effects for a typical diurnal temperature cycle.

Several assumptions are made to simplify these phase partitioning calculations. First, we assume that changes in particle concentration and temperature gradients occur independently from one another; thus, when assessing particle concentration effects, we assume that temperature remains constant, and when assessing temperature effects, we assume a constant particle mass concentration. Second, when calculating  $K_{p,i}$ , we assume  $P_{L,i}^\circ$  to be the predicted subcooled liquid vapor pressure for the model compound (Table S2),  $MW_{OM}$  to be the molar mass of octadecane (in the middle of the volatility range measured by the TAG during this study,  $254 \text{ g mol}^{-1}$ ), and  $\zeta_i$  to be constant at 1. Based on  $\text{PM}_{2.5}$  total mass and total organic carbon measurements measured during July 2016 at the St. Louis Blair Street EPA monitoring site,<sup>14</sup>  $C_{OM}/C_{Tot}$  is assumed to be 0.27, which constitutes a theoretical minimum value, since the fraction of organic matter will increase as indoor gas-phase S/IVOCs partition to the particle phase with window opening. As stated in the main text, spherical particles with a density of  $1.2 \text{ g cm}^{-3}$  are assumed to obtain mass concentrations from SMPS-measured number concentrations. Finally, for each case, we assume that at the final condition defined for the system, steady state is reached. Although several of these assumptions may not be fully accurate for the system, this simplified approach is sufficient to illustrate the relative magnitudes of particle concentration and temperature-driven phase partitioning effects.

### Particle Concentration Effects

During the unoccupied study, indoor particle concentrations increase with window opening as outdoor particles infiltrate indoors. Therefore, we define the relevant change in  $f_{p,i}$  ( $\Delta f_{p,i}$ ) with respect to  $f_{p,i}$  calculated using the first PM data point of the day obtained by the SMPS at 2:09 7/31/2016 ( $f_{p,i,t0}$ ):

$$\Delta f_{p,i} \equiv f_{p,i,t} - f_{p,i,t0} \quad (\text{S6})$$

In these calculations,  $\Delta f_{p,i}$  is determined for each of the four model compounds for each indoor mass concentration measured by the SMPS at an assumed constant temperature of 25°C (Figure S16).

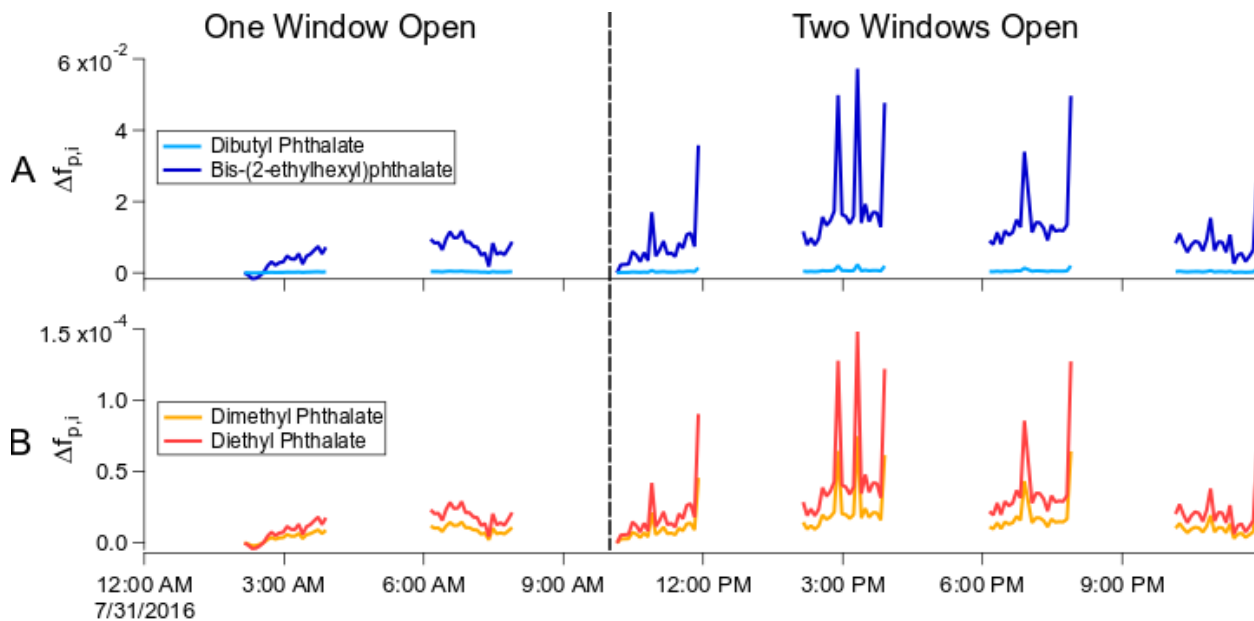

Figure S16.  $\Delta f_{p,i}$  calculated for selected model compounds using indoor particle mass concentrations for 7/31/2016 (Figure 10C): (A) dibutyl phthalate and bis-(2-ethylhexyl)phthalate, and (B) dimethyl phthalate and diethyl phthalate.

#### Temperature Effects

To evaluate temperature gradient impacts, we define  $\Delta f_{p,i}$  as:

$$\Delta f_{p,i} \equiv f_{p,i,T_{in}} - f_{p,i,T_{out}} \quad (S7)$$

where  $f_{p,i,T_{in}}$  is the approximate  $f_{p,i}$  at the indoor temperature and  $f_{p,i,T_{out}}$  is the approximate  $f_{p,i}$  at the corresponding outdoor temperature. A constant particle mass concentration of  $5 \mu\text{g m}^{-3}$ , the average indoor mass concentration for 7/31/2016, is assumed for these calculations.

Figure S17 displays  $\Delta f_{p,i}$  for the four phthalates under varied temperature gradient conditions for 7/31/2016. Notably, when compared with  $\Delta f_{p,i}$  evaluated under varied PM conditions, typical  $\Delta f_{p,i}$  values under observed temperature gradients are generally lower by two orders of magnitude. Thus, we conclude that the influx of infiltrating particles acting as a condensational sink is the primary mechanism for the increased S/IVOC gas-to-particle phase partitioning observed with window opening.

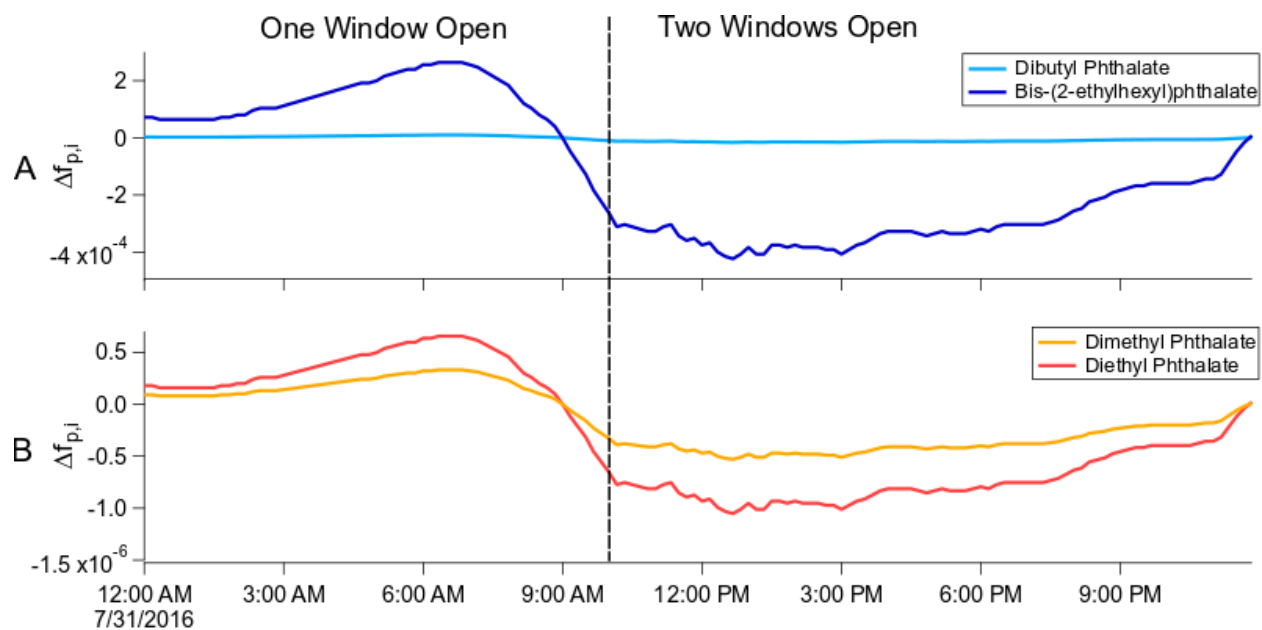

Figure S17.  $\Delta f_{p,i}$  calculated for selected model compounds using temperature gradients ( $\Delta T = T_{in} - T_{out}$ ) measured for 7/31/2016 (Figure S6A): (A) dibutyl phthalate and bis-(2-ethylhexyl)phthalate, and (B) dimethyl phthalate and diethyl phthalate.

## Section S12: Evaluation of Particle-Phase Enhancements Relative to Outdoor Particle Infiltration

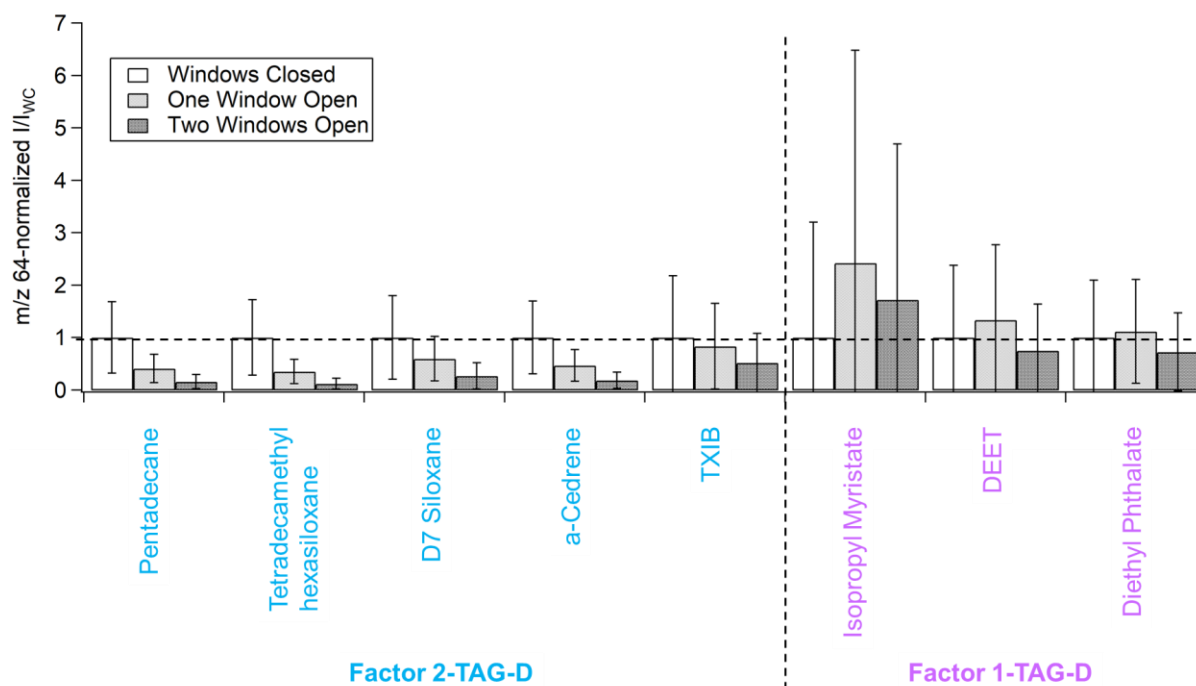

Figure S18.  $I/I_{WC}$  for selected TAG denuded (particle only) compounds loading into PMF factors 1-TAG-D and 2-TAG-D, normalized to  $I/I_{WC}$  for TAG decomposition sulfate ( $m/z$  64). Compounds with purple text load primarily into factor 1-TAG-D, and compounds with blue text load primarily into factor 2-TAG-D.



## References

1. ACRONIM Field Site. October 2018. October 2018. <https://www.google.com/maps/@38.6092313,-90.2306351,1615m/data=!3m1!1e3>.
2. Horel J, Splitt M, Dunn L, et al. Mesowest: cooperative mesonets in the western united states. *Bull Am Meteorol Soc.* 2002;83:211–226.
3. Horel J, Potter T, Dunn L, et al. Weather Support for the 2002 Winter Olympic and Paralympic Games. *Bull Am Meteorol Soc.* 2002;83:227–240.
4. MesoWest Data. <https://mesowest.utah.edu/>. Accessed May 28, 2019.
5. ACD/Labs: Advanced Chemistry Development (ACD/Labs) Software V11.02 (© 1994–2012 ACD/Labs), Retrieved from <http://www.cas.org/products/scifinder>, May 11, 2017.
6. Paatero P. Least squares formulation of robust non-negative factor analysis. *Chemom Intell Lab Syst.* 1997;37:23–35.
7. Ulbrich IM, Canagaratna MR, Zhang Q, Worsnop DR, Jimenez JL. Interpretation of organic components from Positive Matrix Factorization of aerosol mass spectrometric data. *Atmos Chem Phys.* 2009;9:2891–2918.
8. Williams BJ, Goldstein AH, Kreisberg NM, et al. Major components of atmospheric organic aerosol in southern California as determined by hourly measurements of source marker compounds. *Atmos Chem Phys.* 2010;10:11577–11603.
9. Williams BJ, Goldstein AH, Kreisberg NM, Hering SV. An In-Situ Instrument for Speciated Organic Composition of Atmospheric Aerosols: Thermal Desorption Aerosol GC/MS-FID (TAG). *Aerosol Sci Technol.* 2006;40:627–638.
10. Kreisberg NM, Hering SV, Williams BJ, Worton DR, Goldstein AH. Quantification of Hourly Speciated Organic Compounds in Atmospheric Aerosols, Measured by an In-Situ Thermal Desorption Aerosol Gas Chromatograph (TAG). *Aerosol Sci Technol.* 2009;43:38–52.
11. Zhang Y, Williams BJ, Goldstein AH, Docherty K, Ulbrich IM, Jimenez JL. A Technique for Rapid Gas Chromatography Analysis Applied to Ambient Organic Aerosol Measurements from the Thermal Desorption Aerosol Gas Chromatograph (TAG). *Aerosol Sci Technol.* 2014;48:1166–1182.
12. EPA PMF 1.1 User's Guide. [https://cfpub.epa.gov/si/si\\_public\\_record\\_report.cfm?Lab=NERL&dirEntryId=140842](https://cfpub.epa.gov/si/si_public_record_report.cfm?Lab=NERL&dirEntryId=140842). Accessed March 12, 2019.
13. Fortenberry CF, Walker MJ, Zhang Y, Mitroo D, Brune WH, Williams BJ. Bulk and molecular-level characterization of laboratory-aged biomass burning organic aerosol from oak leaf and heartwood fuels. *Atmos Chem Phys.* 2018;18:2199–2224.
14. US Environmental Protection Agency. Air Quality System Data Mart [internet database] available at <http://www.epa.gov/ttn/airs/aqsdatamart>. Accessed May 28, 2019.
